# Supplementary material for: Nitrile stabilized synthesis of pyrrolidine and piperidine derivatives via tandem alkynyl aza-Prins–Ritter reactions
Source: Royal Society of Chemistry journal article supplement (doi:10.1039/d3ob01764h), 2023-12-14

Supporting Information for Publication

**Nitrile Stabilized Synthesis of Pyrrolidine and Piperidine Derivatives *via* Tandem Alkynyl aza Prins-Ritter Reactions**

Sudip Shit, Chinmayee Choudhury and Anil K. Saikia\*

Department of Chemistry, Indian Institute of Technology Guwahati, Guwahati 781039, Assam, India.

Email: [asaikia@iitg.ac.in](mailto:asaikia@iitg.ac.in)

**Contents**

1. HRMS spectra of all new compounds S2-S29

# HRMS spectrum of **1a**

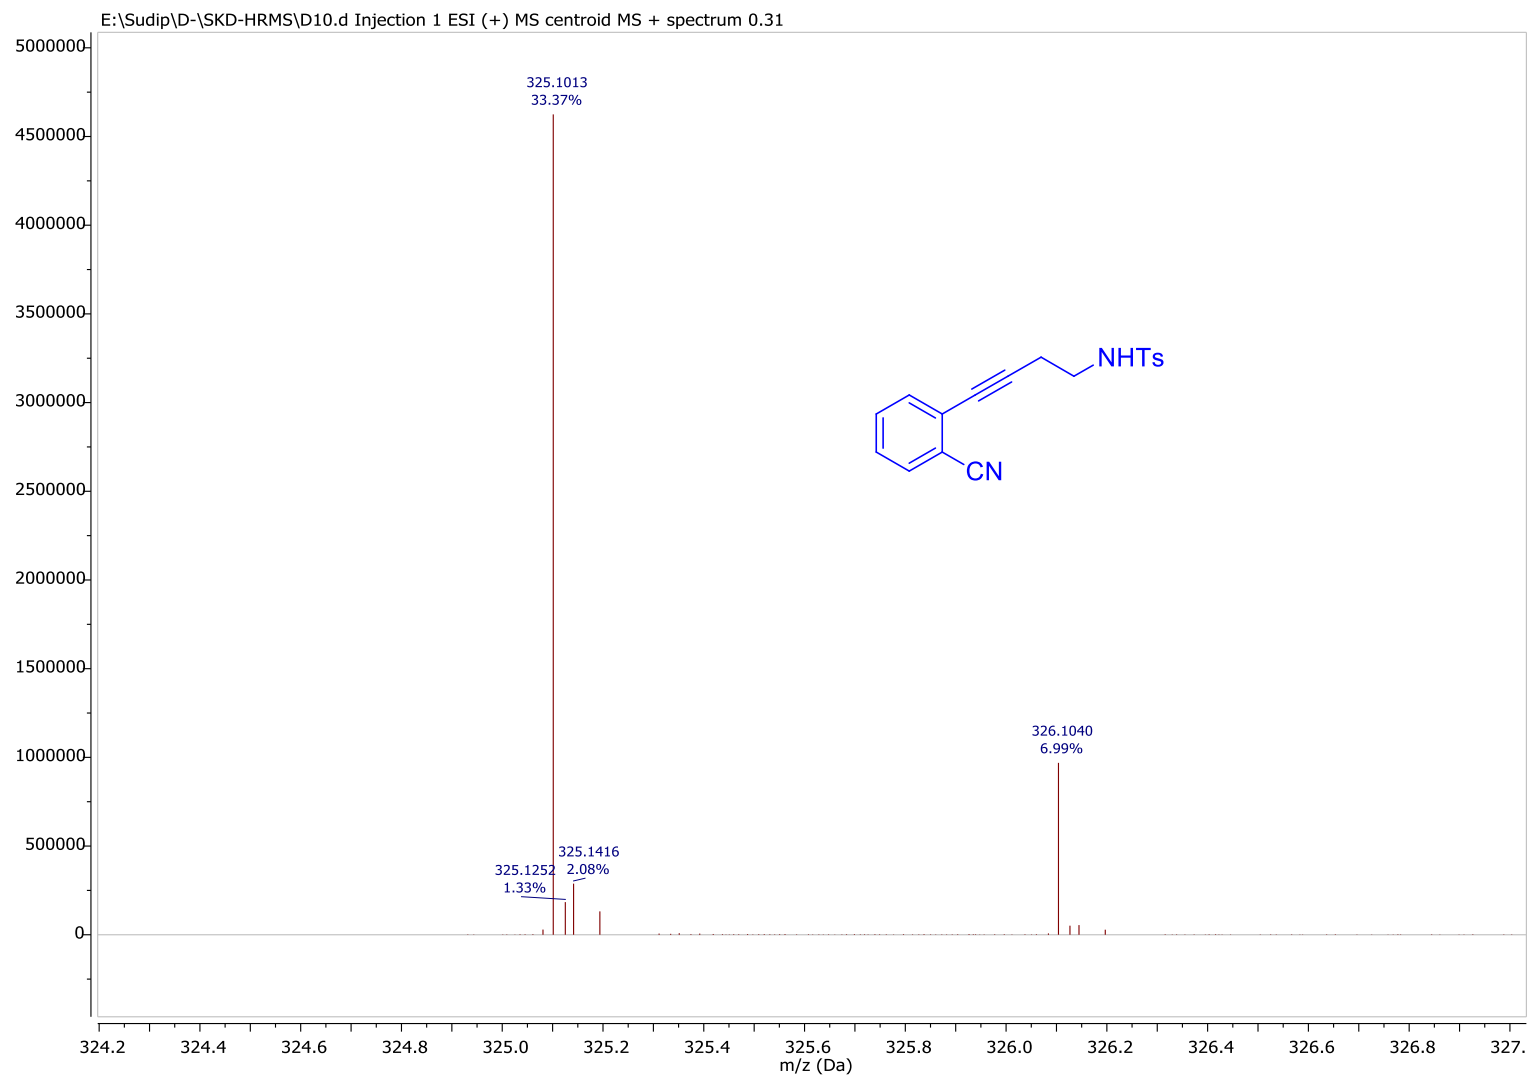

# HRMS spectrum of **1b**

E:\Sudip\D-\SKD-HRMS\D 26.d Injection 1 ESI (+) MS centroid MS + spectrum 0.35

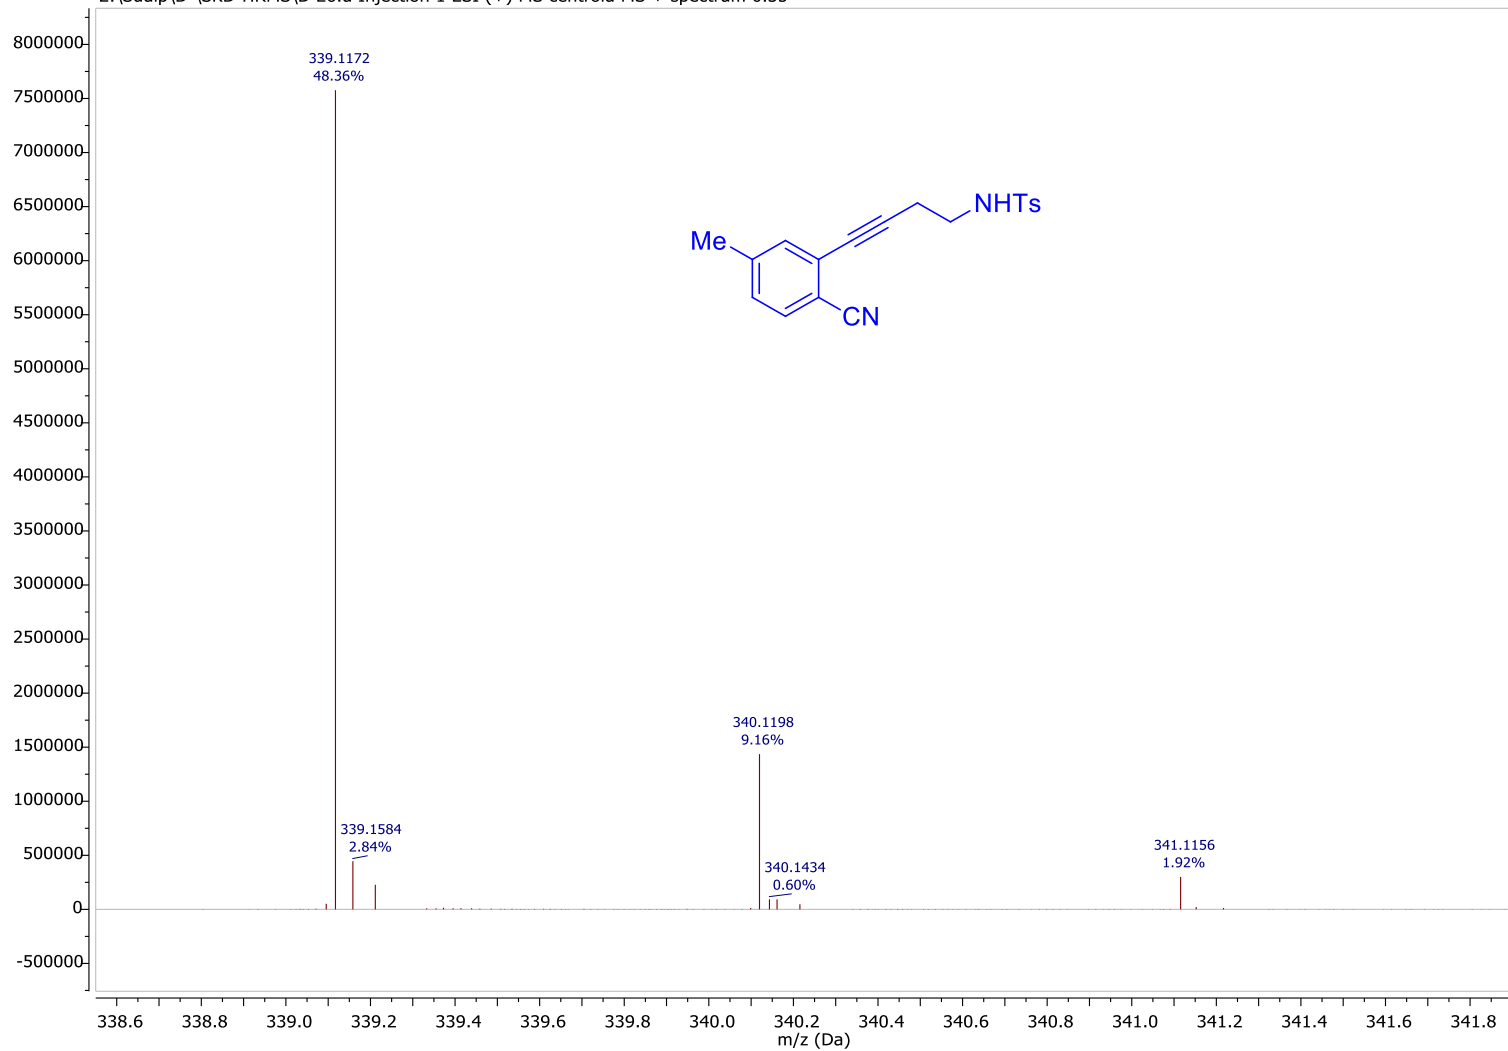

# HRMS spectrum of **1c**

E:\Sudip\D-\SKD-HRMS\D27.d Injection 1 ESI (+) MS centroid MS + spectrum 0.31

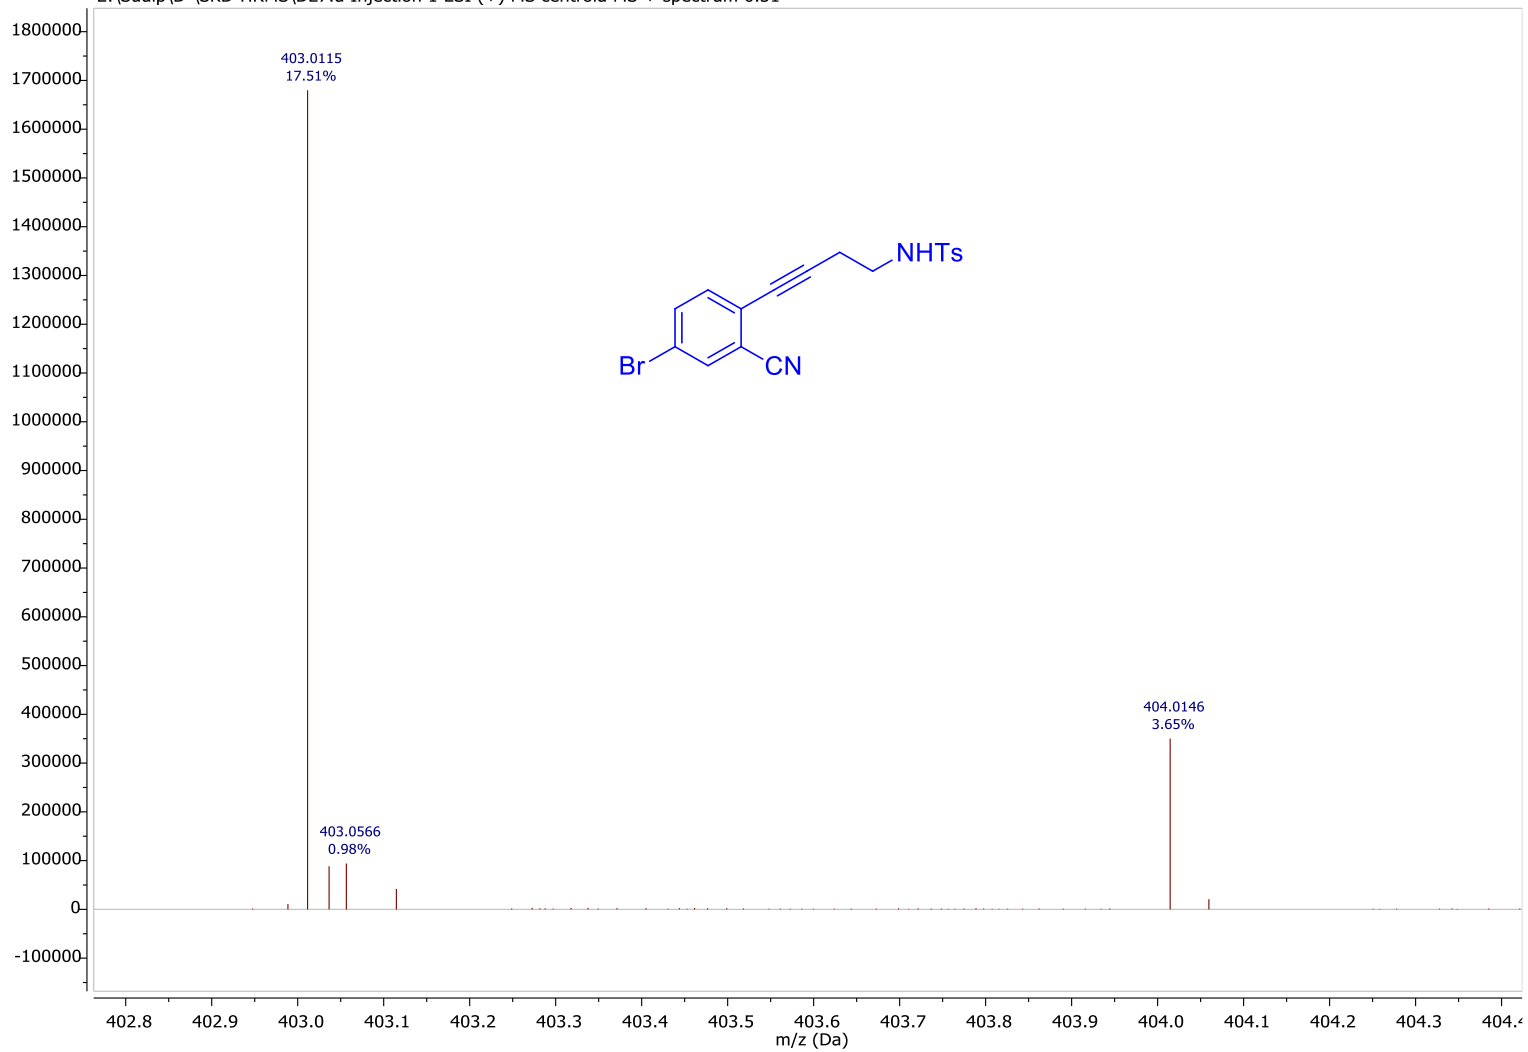

# HRMS spectrum of **1d**

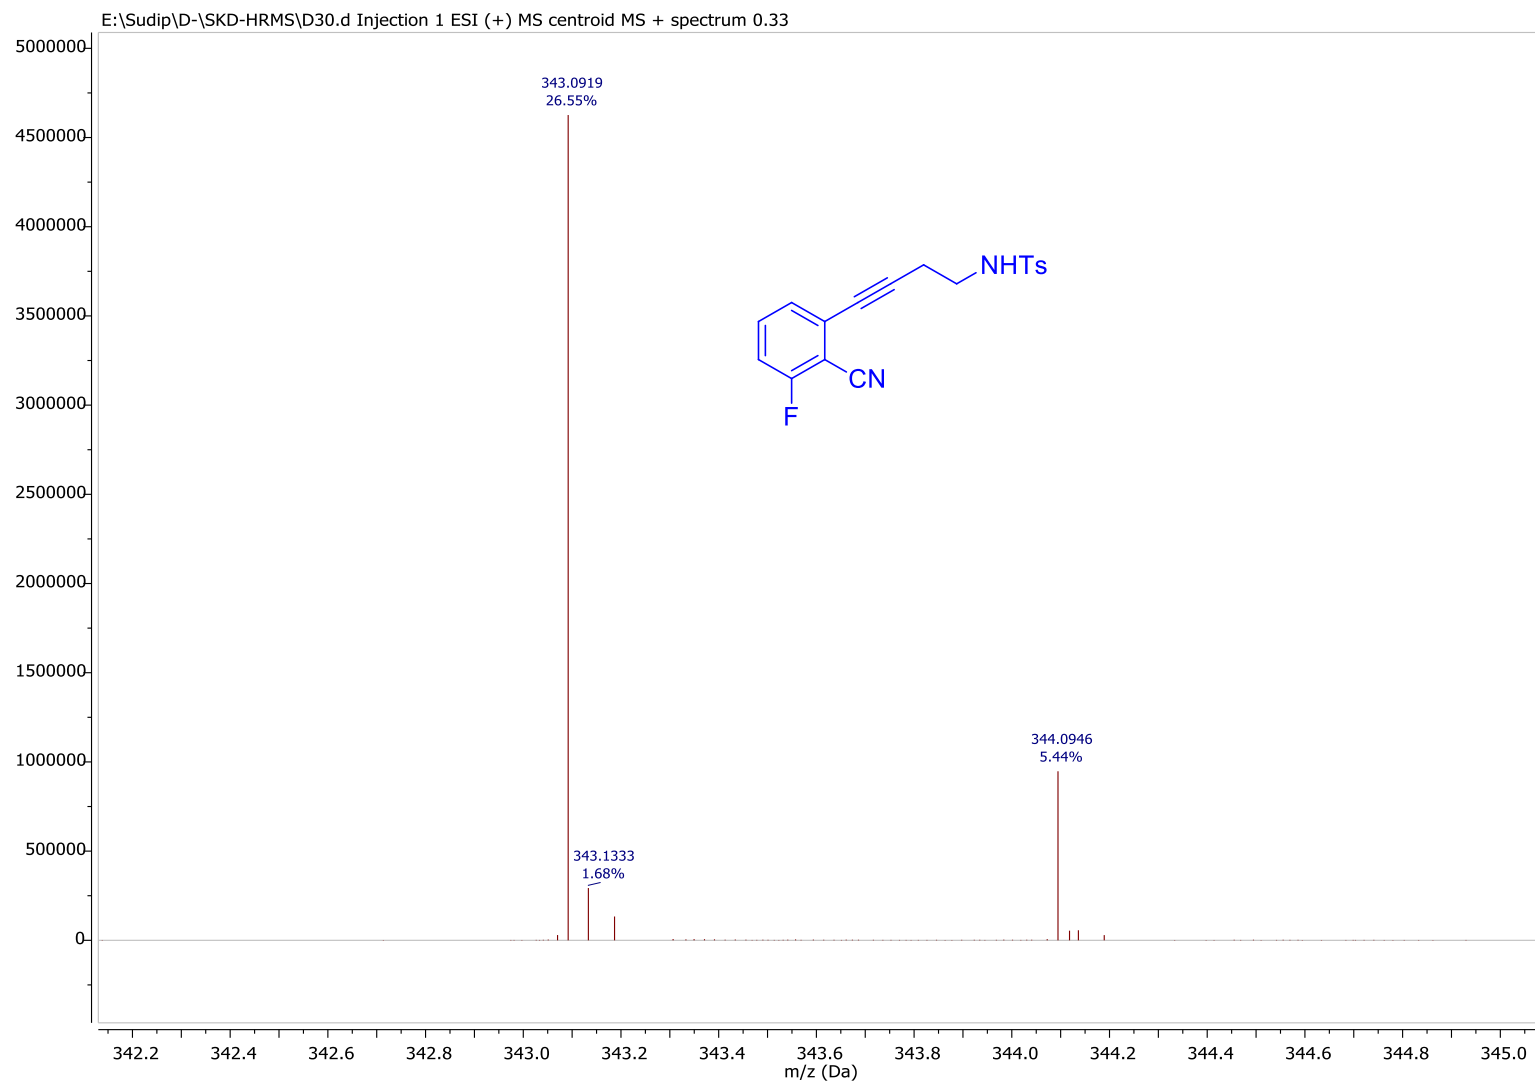

# HRMS spectrum of **1e**

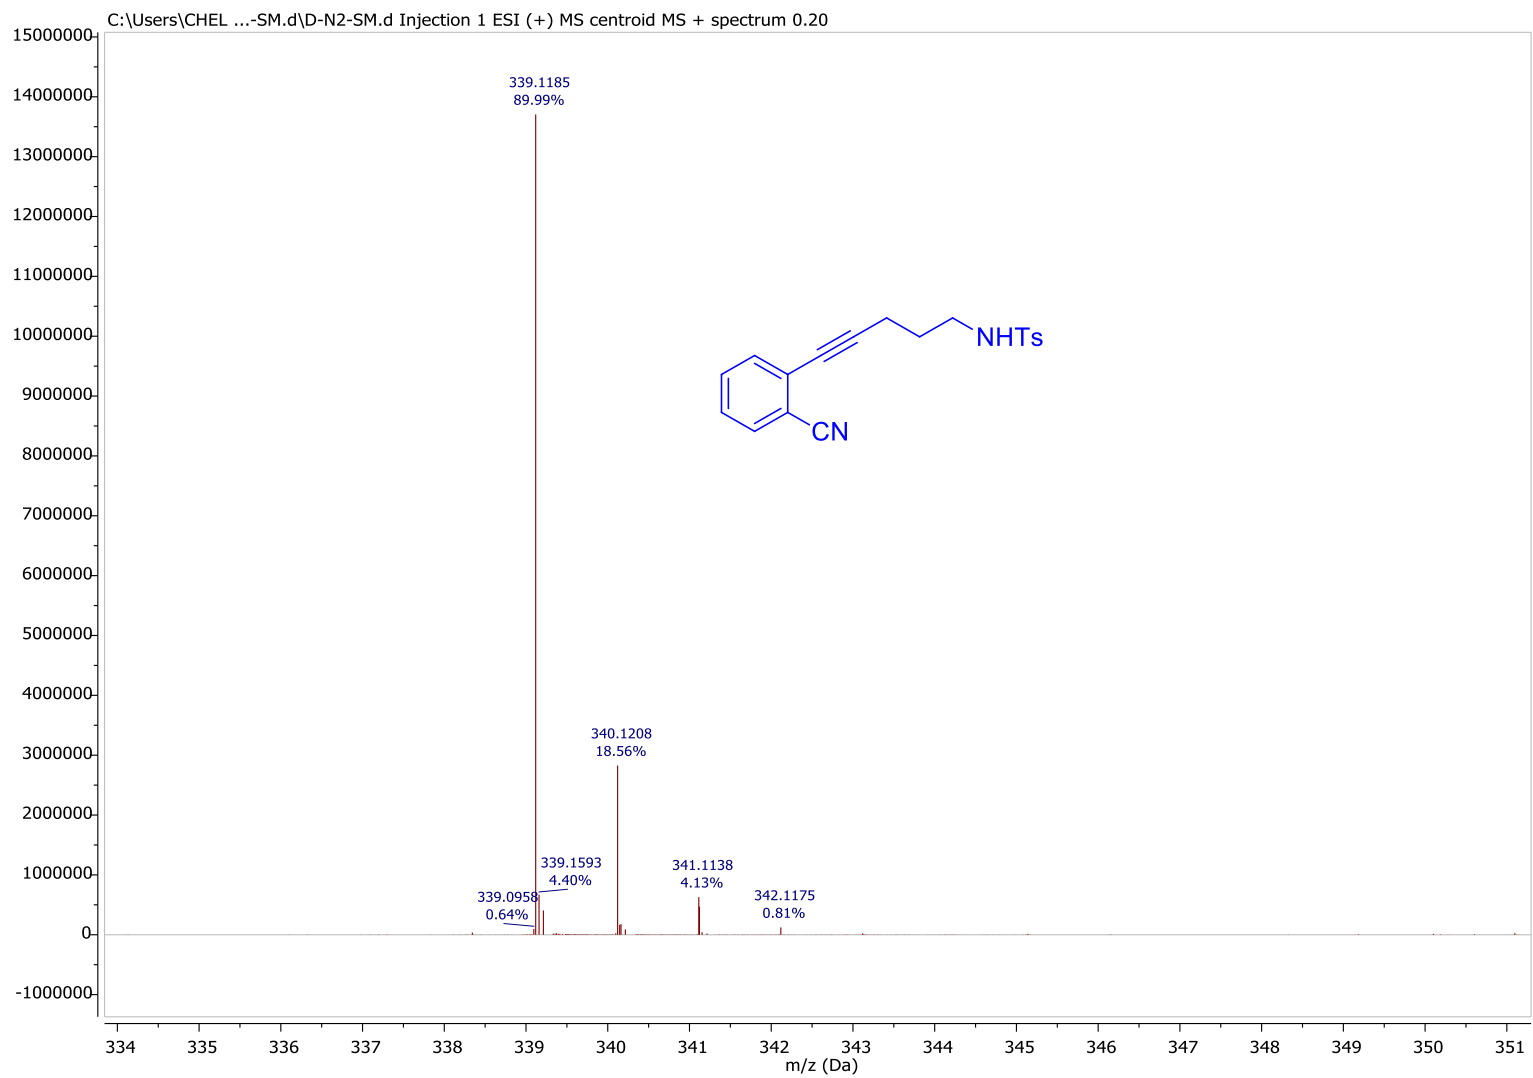

# HRMS spectrum of **1f**

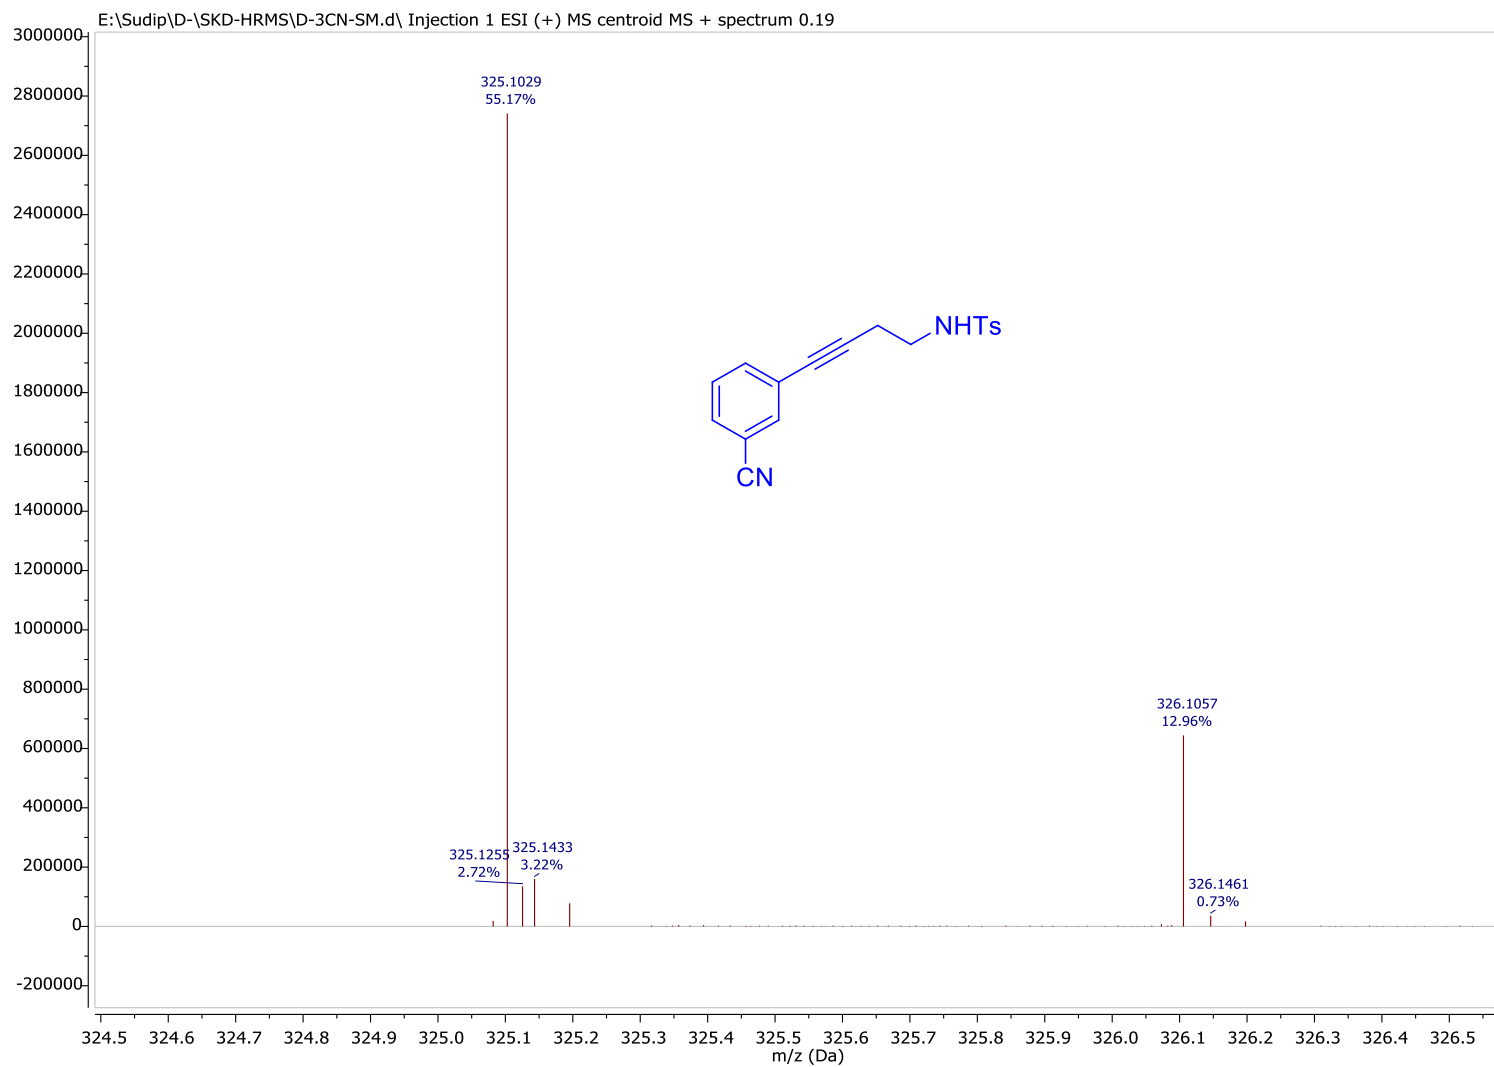

# HRMS spectrum of **1g**

C:\Users\Subha...r\AKS-SS-1-OH.d Injection 1 ESI (+) MS centroid MS + spectrum 0.28

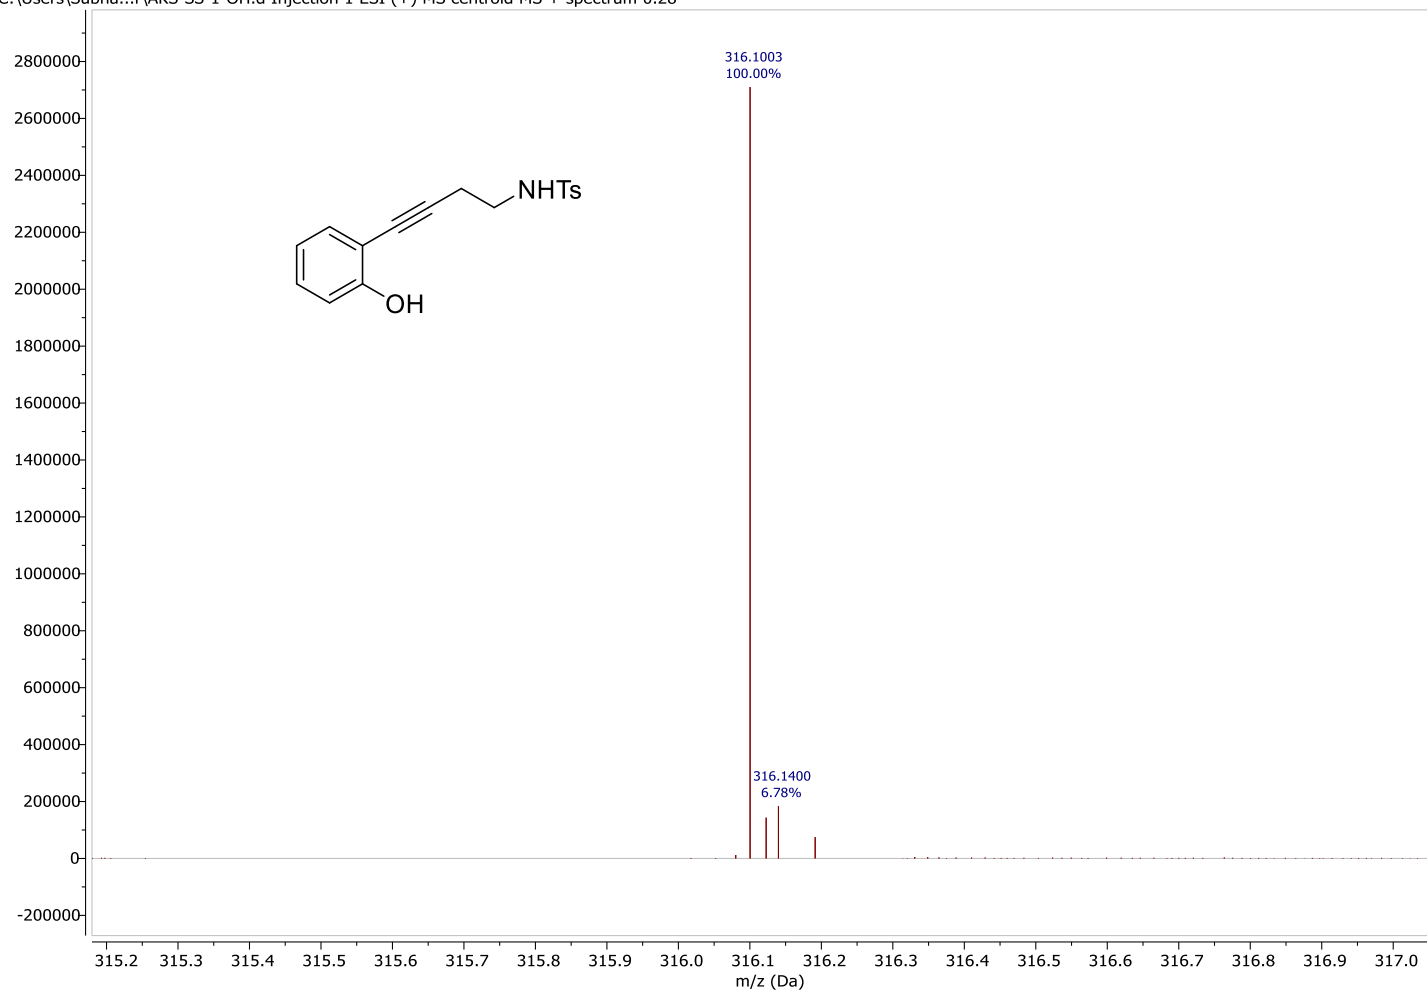



# HRMS spectrum of Z-3aa

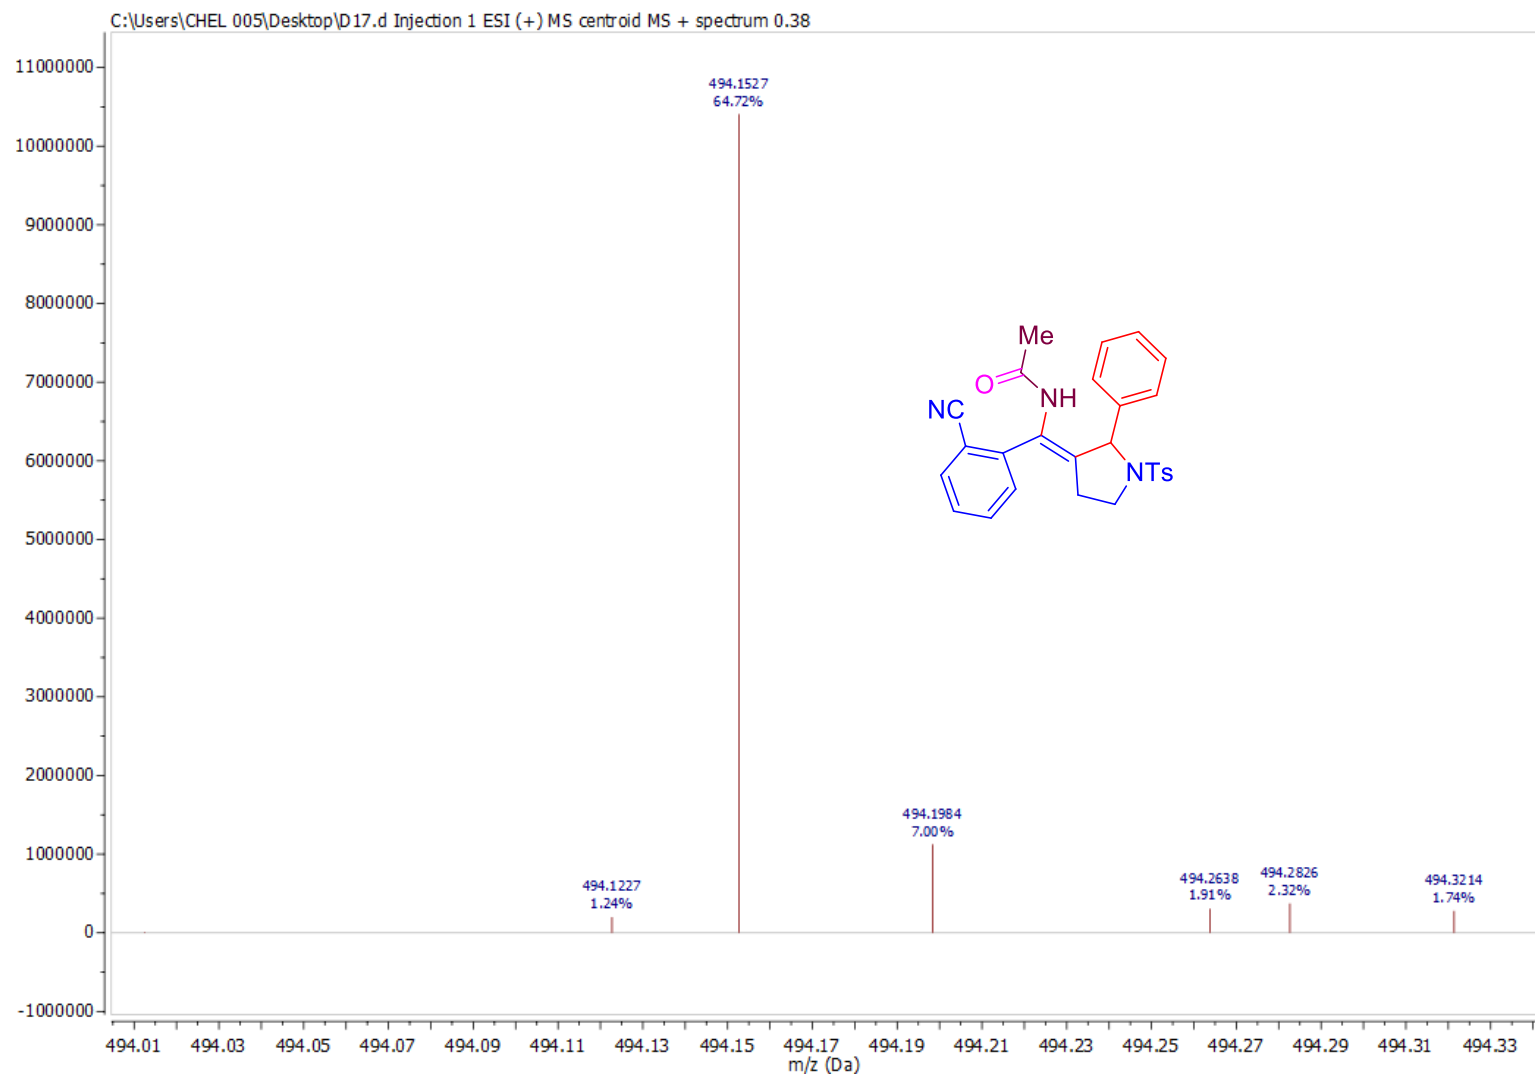

# HRMS spectrum of *E-3aa*

E:\Sudip\D-\SKD-HRMS\SKD-PH.d Injection 1 ESI (+) MS centroid MS + spectrum 0.34

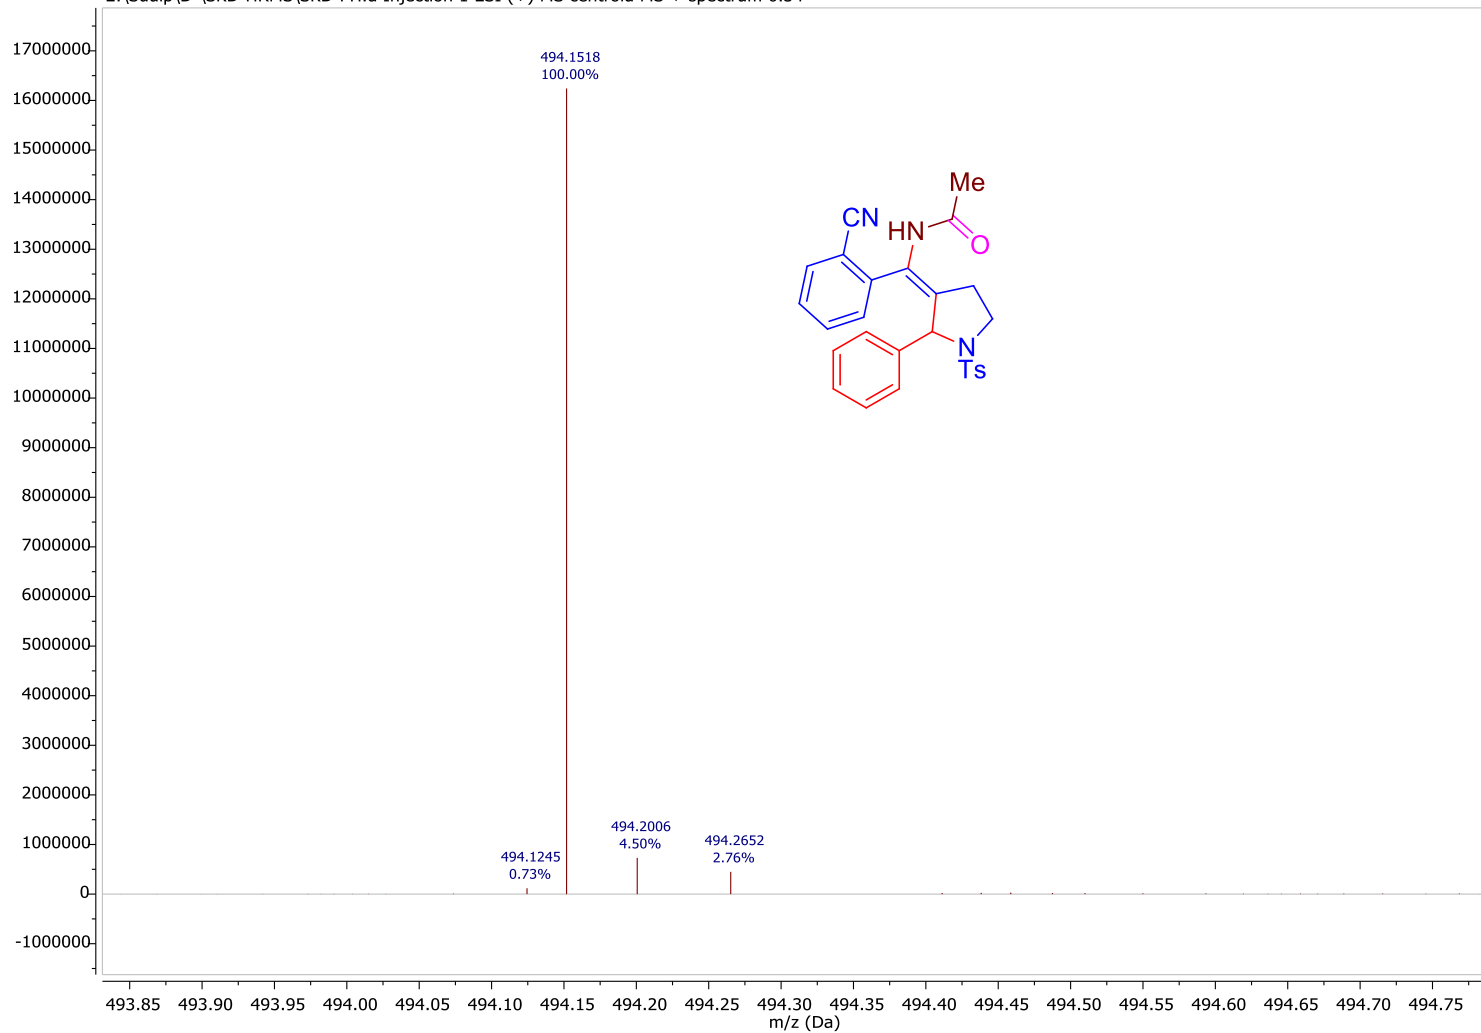

S10

# HRMS spectrum of Z-3ac

E:\Sudip\D-\SKD-HRMS\SKD-4ME.d Injection 1 ESI (+) MS centroid MS + spectrum 0.36

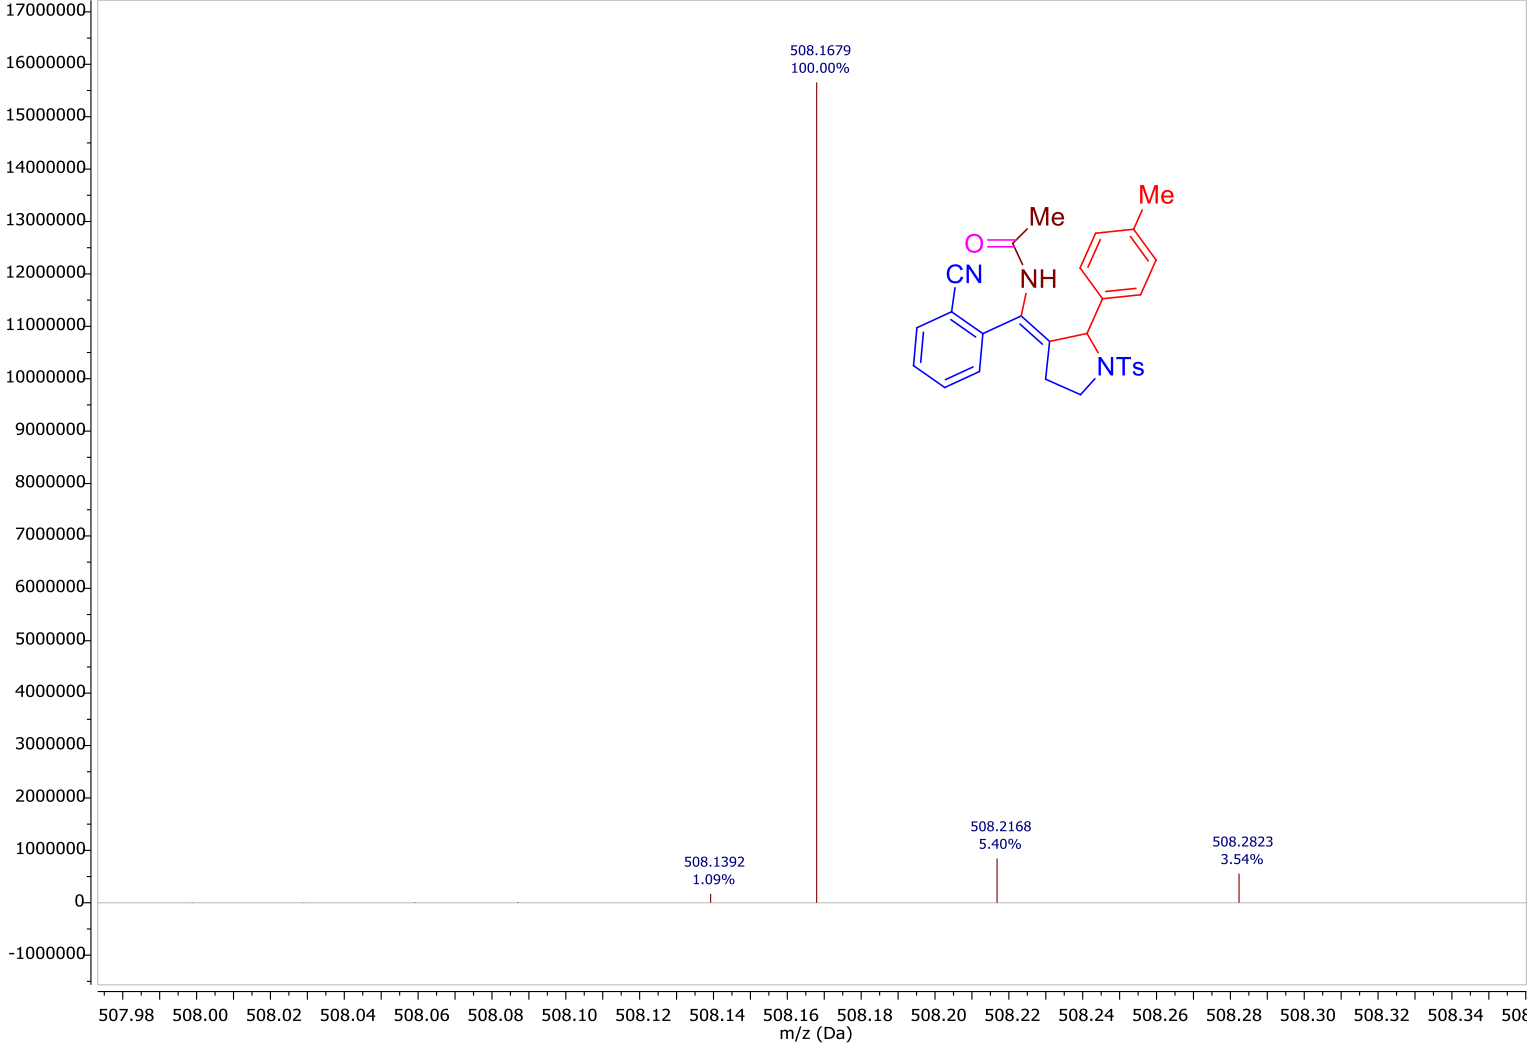

# HRMS spectrum of Z-3ad

C:\Users\CHEL ...LLAV.d\SKD 29.d Injection 1 ESI (+) MS centroid MS + spectrum 0.32

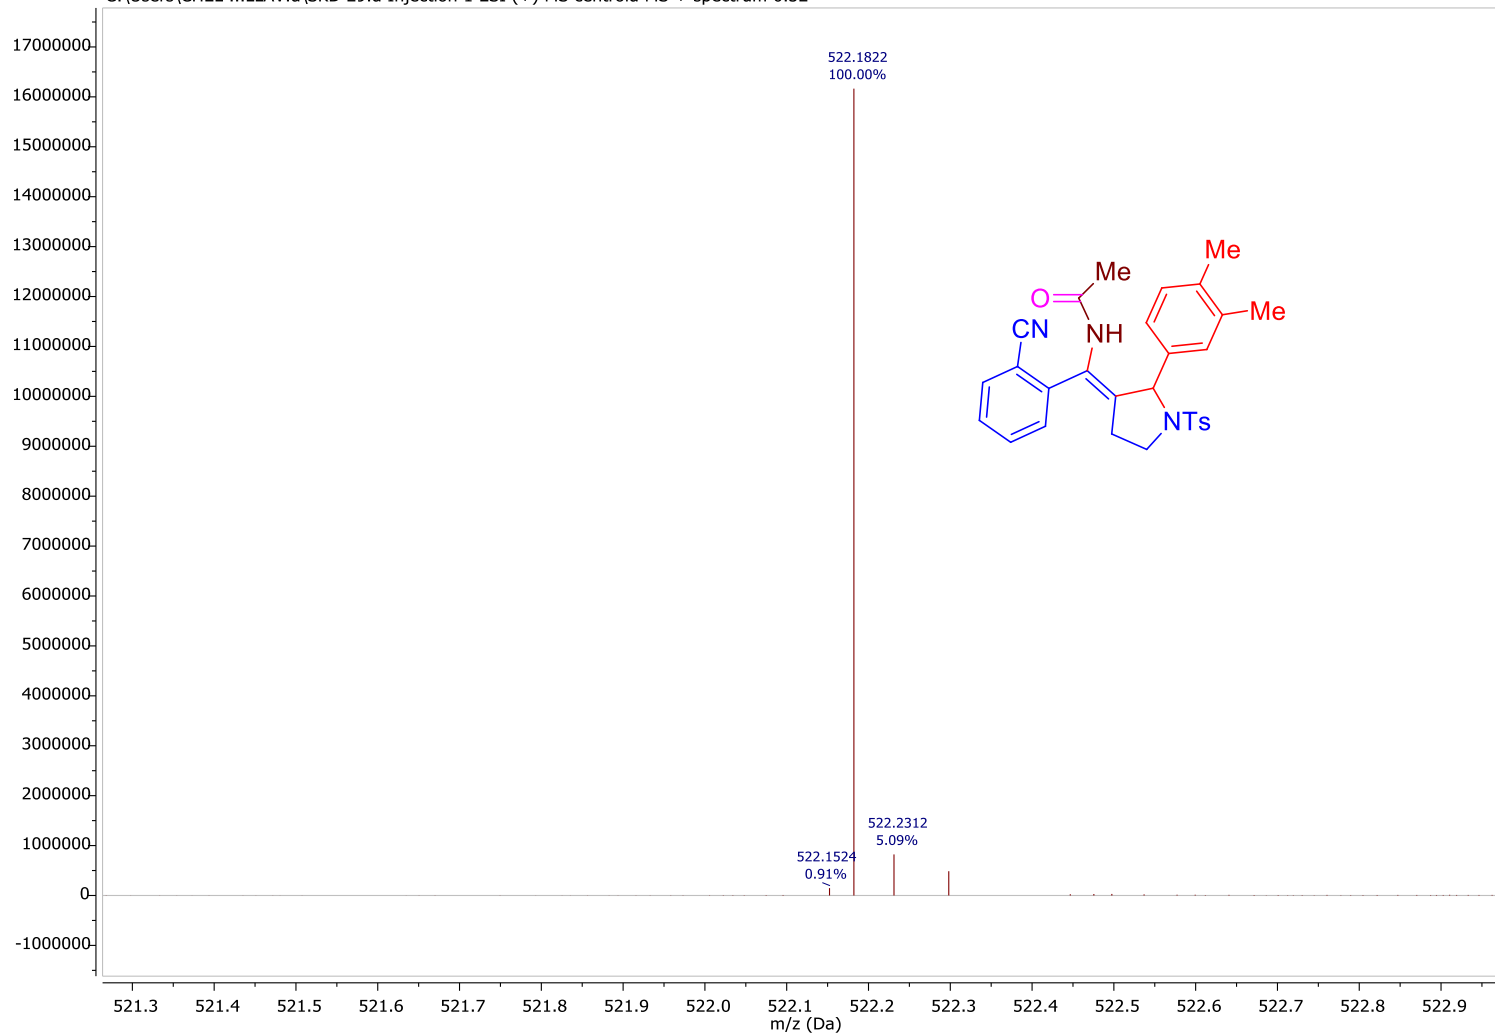

S12

HRMS spectrum of **Z-3ae**

C:\Users\CHEL ...LLAV.d\SKD 21.d Injection 1 ESI (+) MS centroid MS + spectrum 0.29

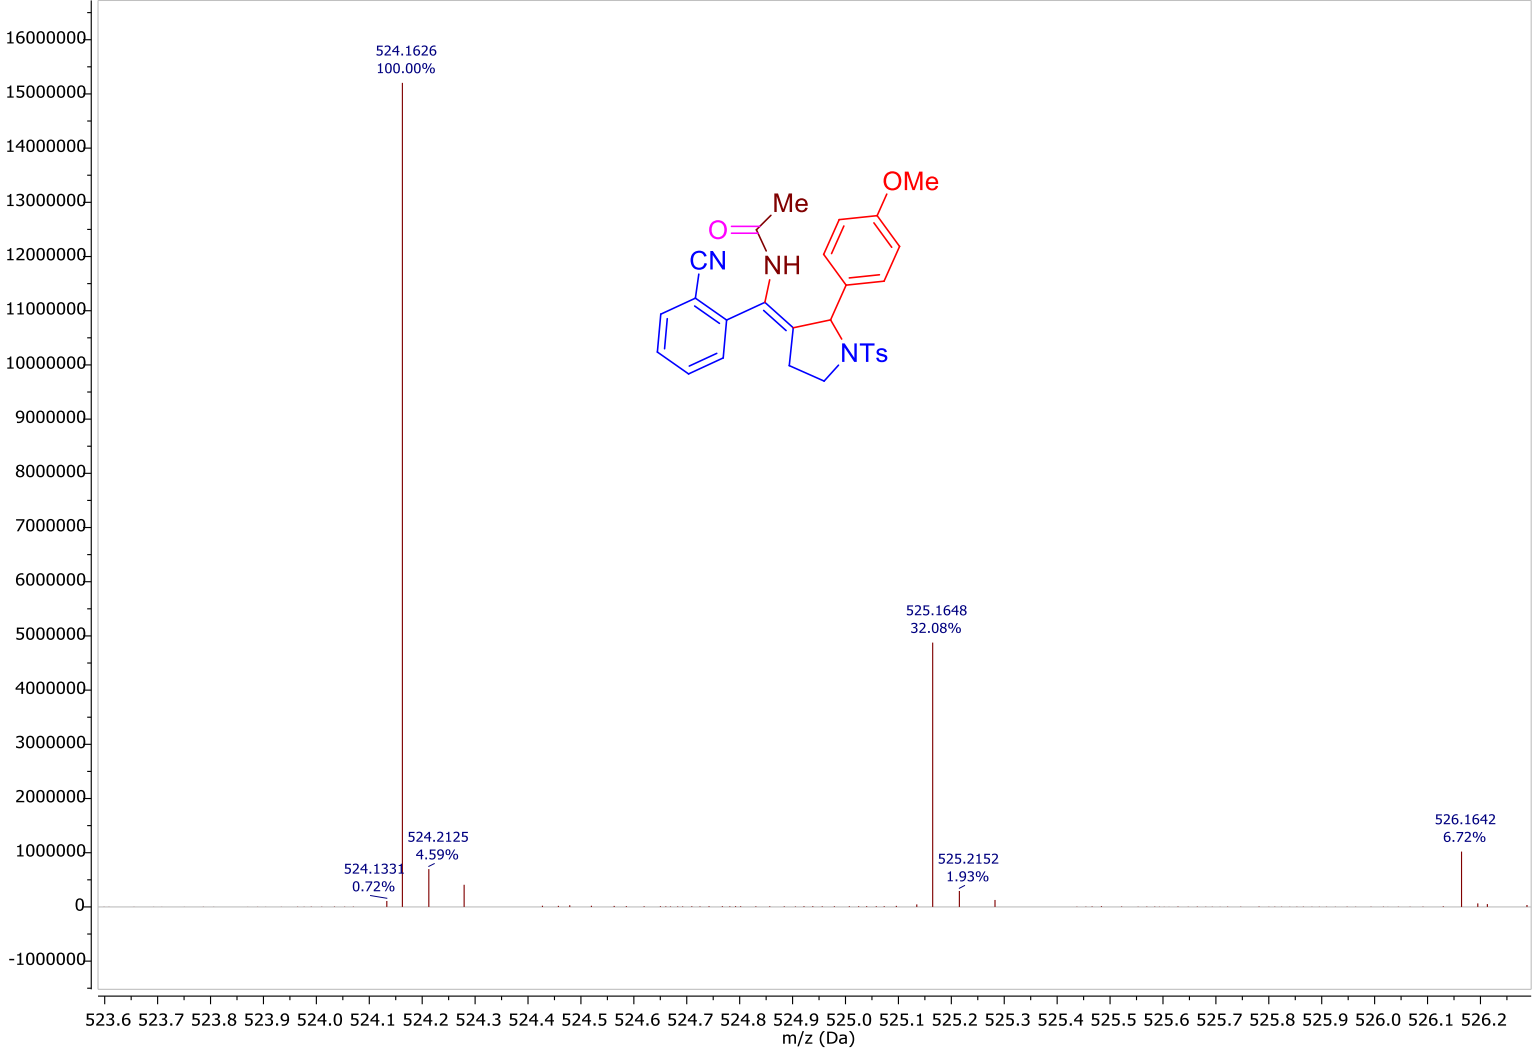

# HRMS spectrum of *E-3af*

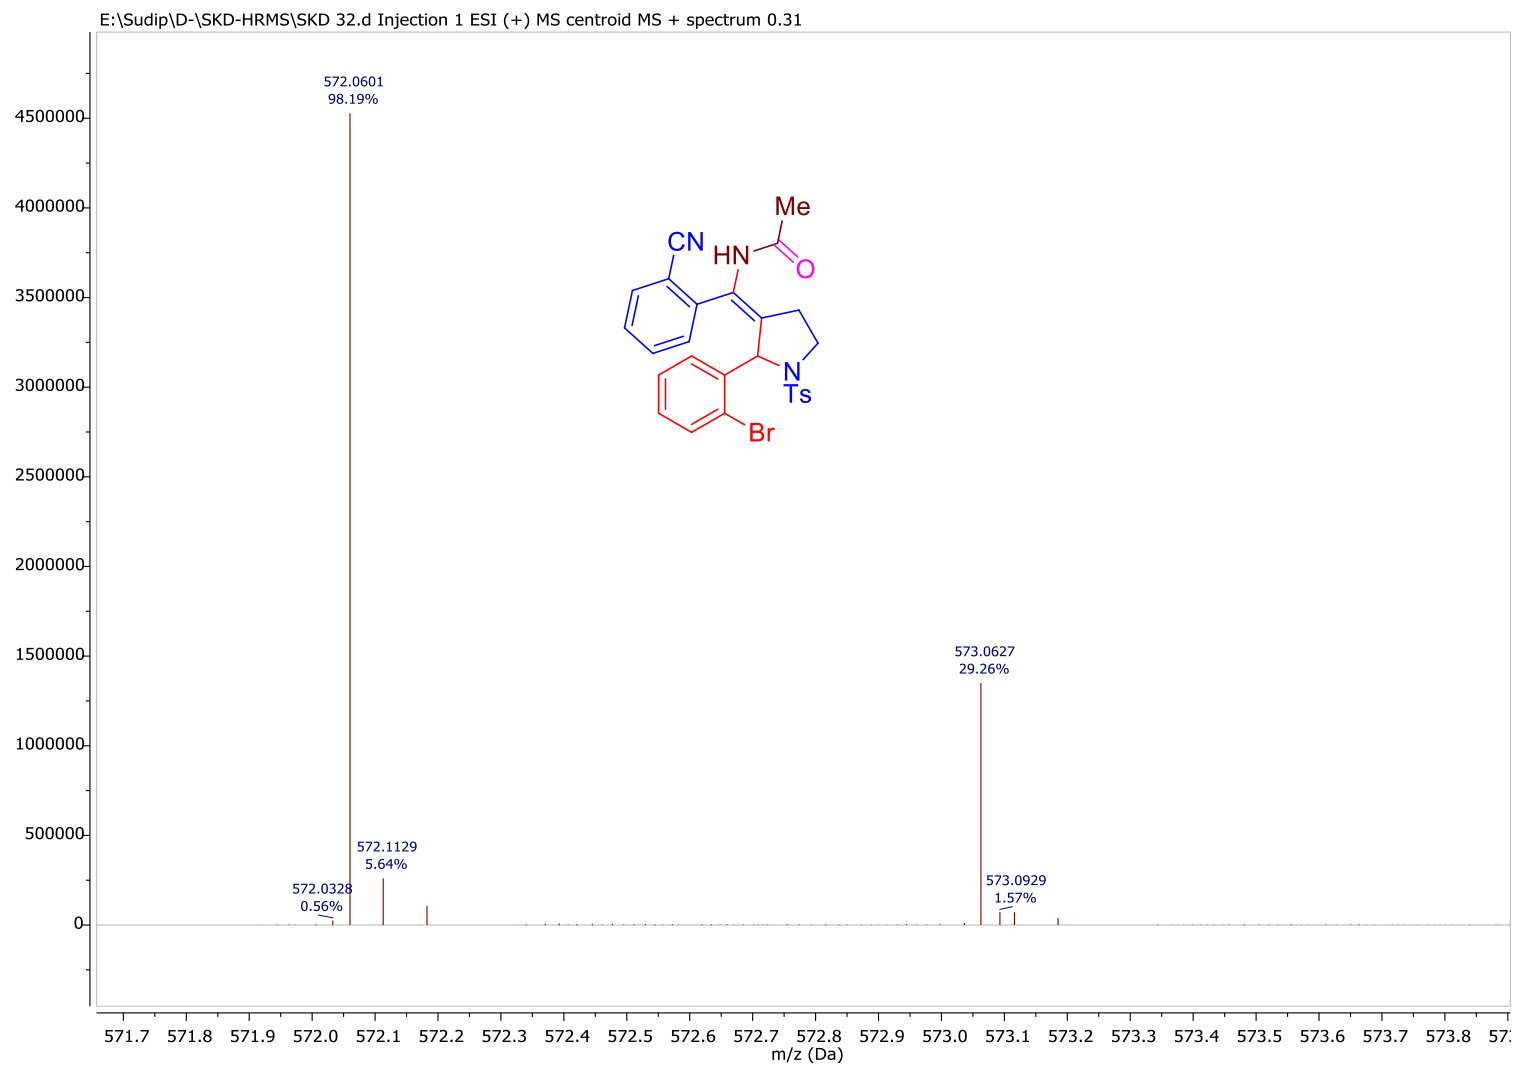

# HRMS spectrum of *E-3ag*

C:\Users\CHEL ...LLAV.d\SKD 38.d Injection 1 ESI (+) MS centroid MS + spectrum 0.19

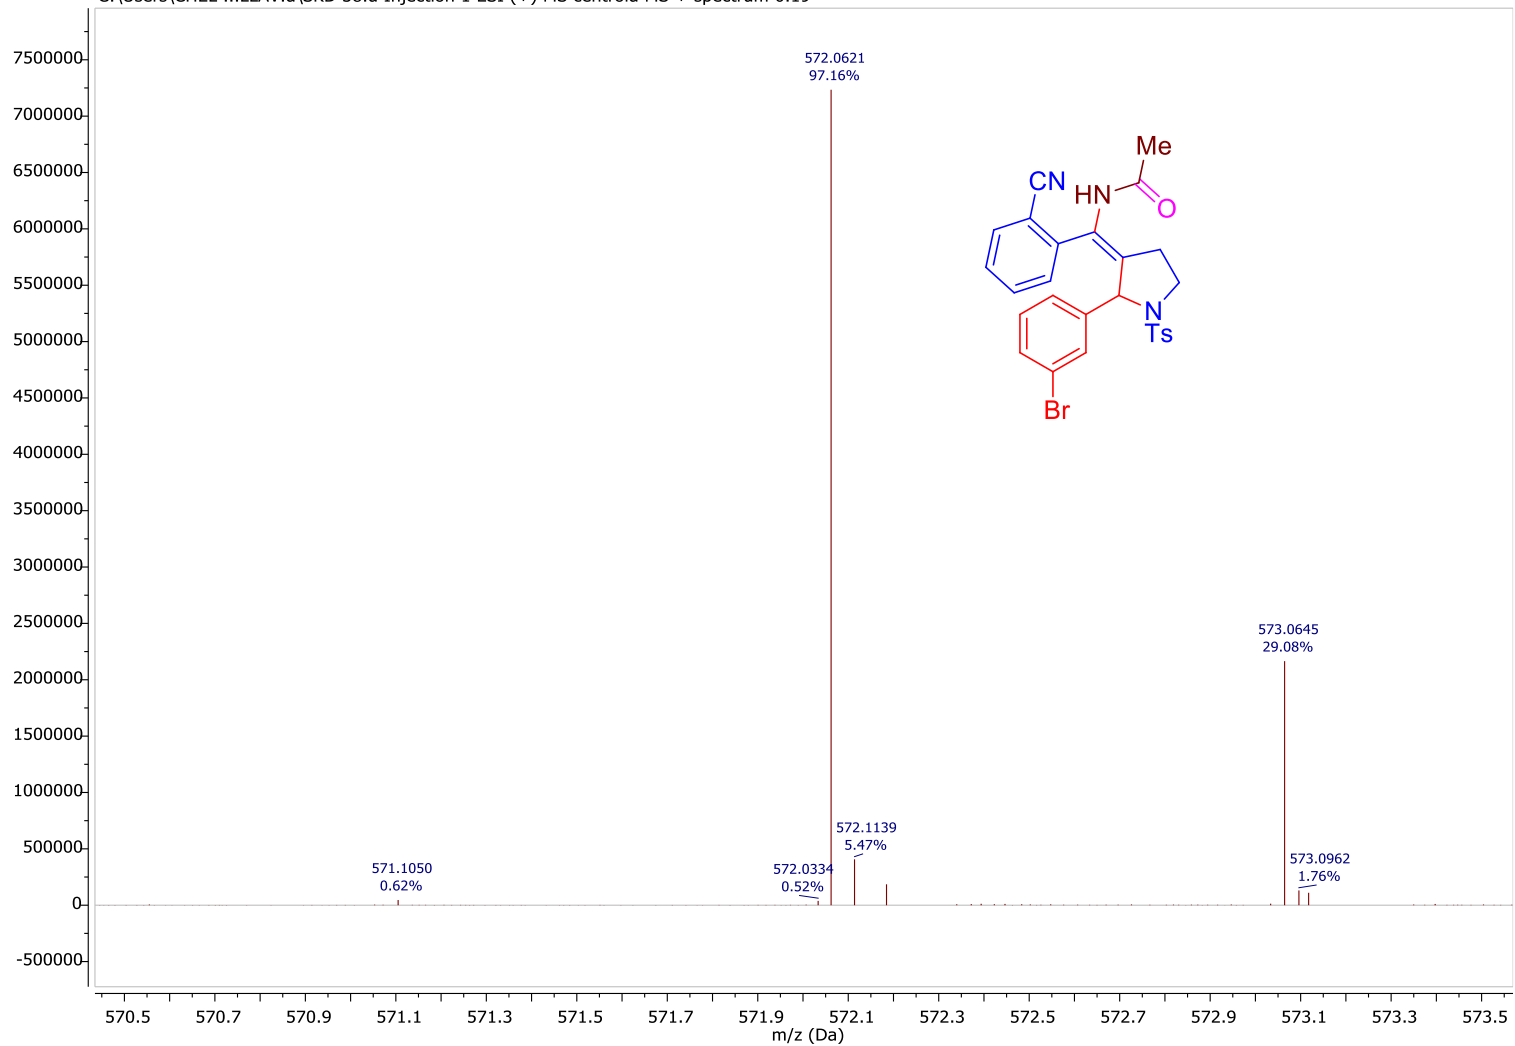

S15

HRMS spectrum of *E-3ah*

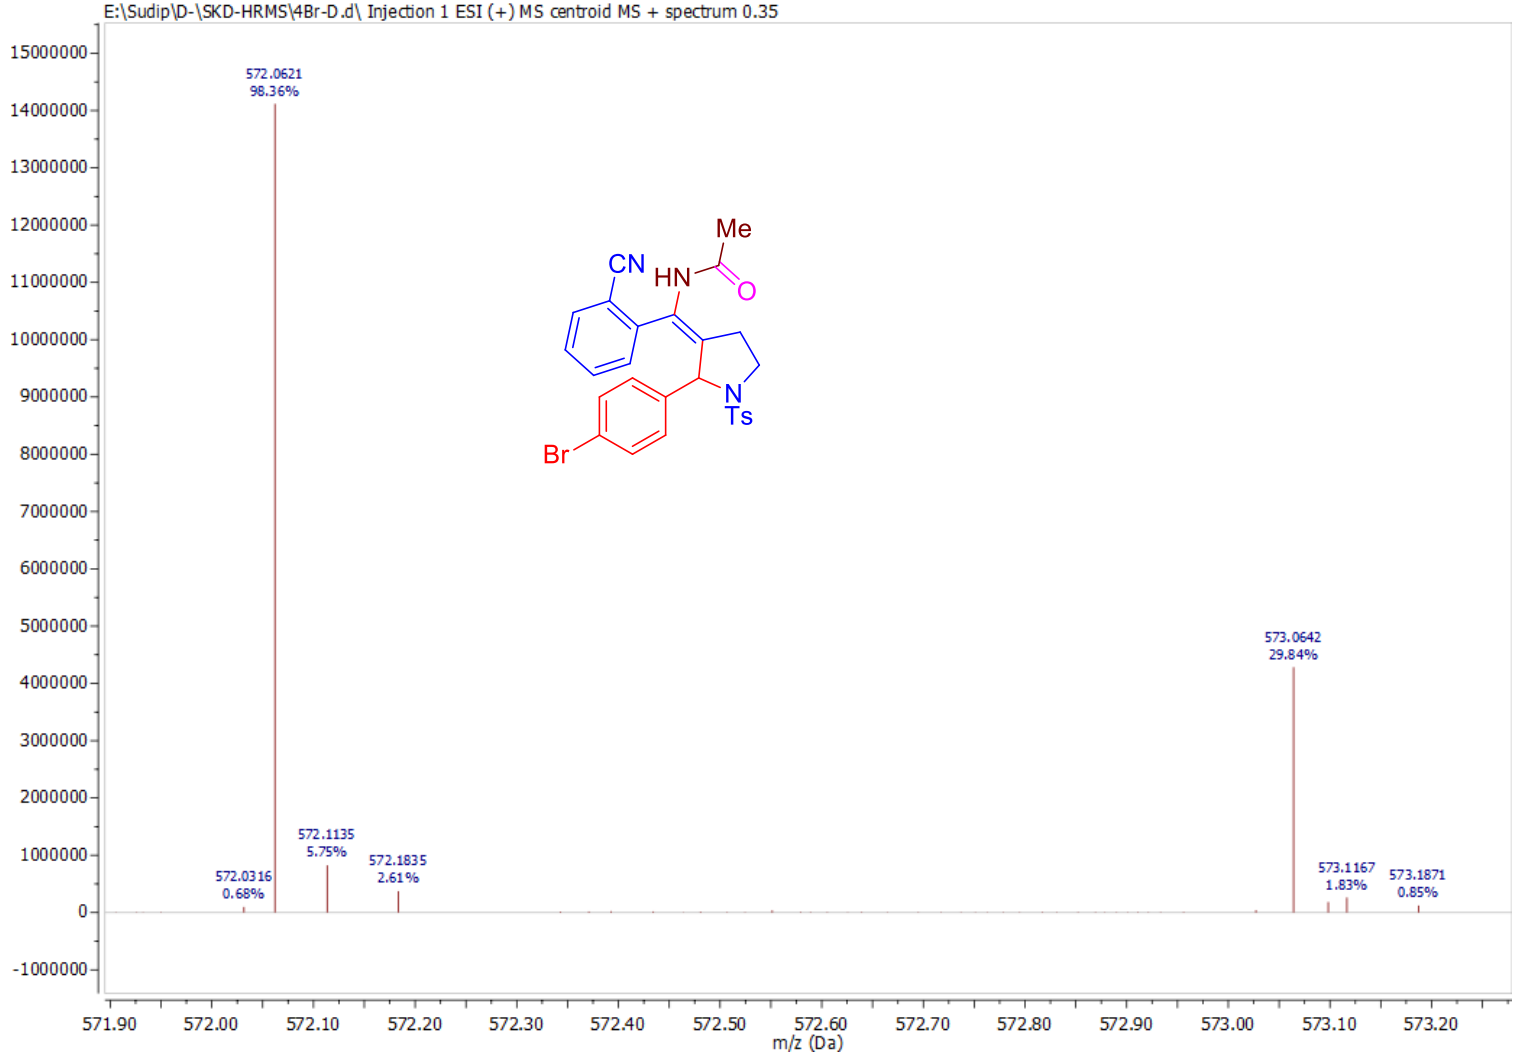



# HRMS spectrum of *E-3ai*

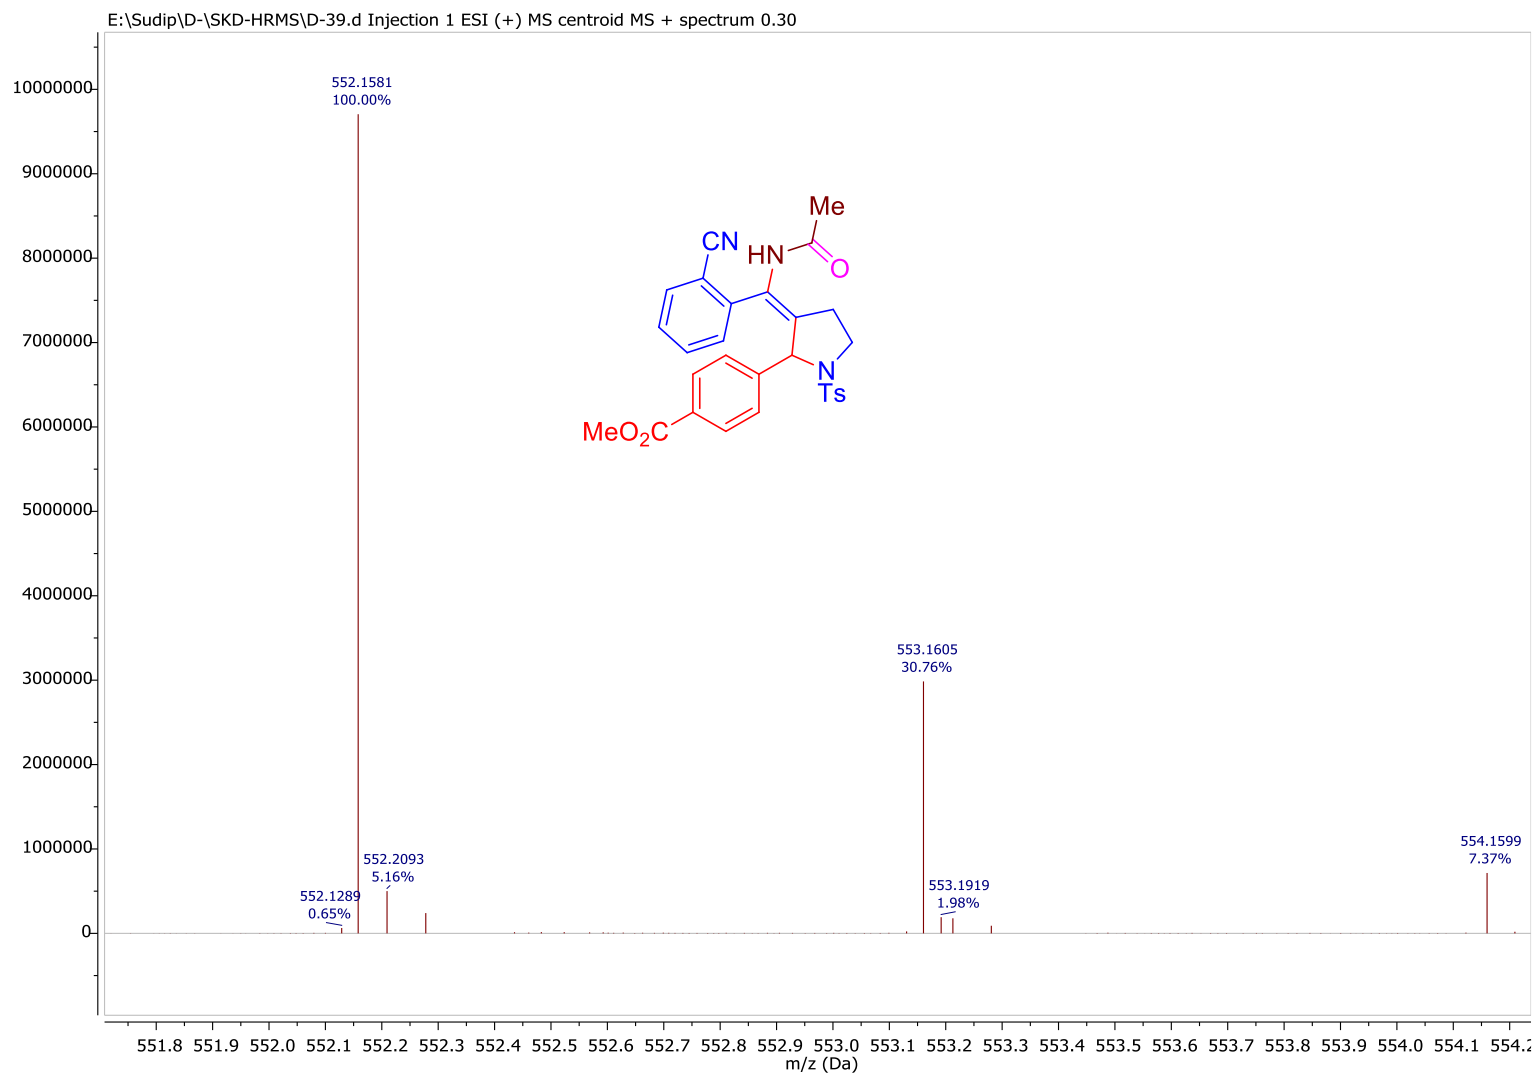

# HRMS spectrum of *E-3aj*

E:\Sudip\D-\SKD-HRMS\D21.d Injection 1 ESI (+) MS centroid MS + spectrum 0.19

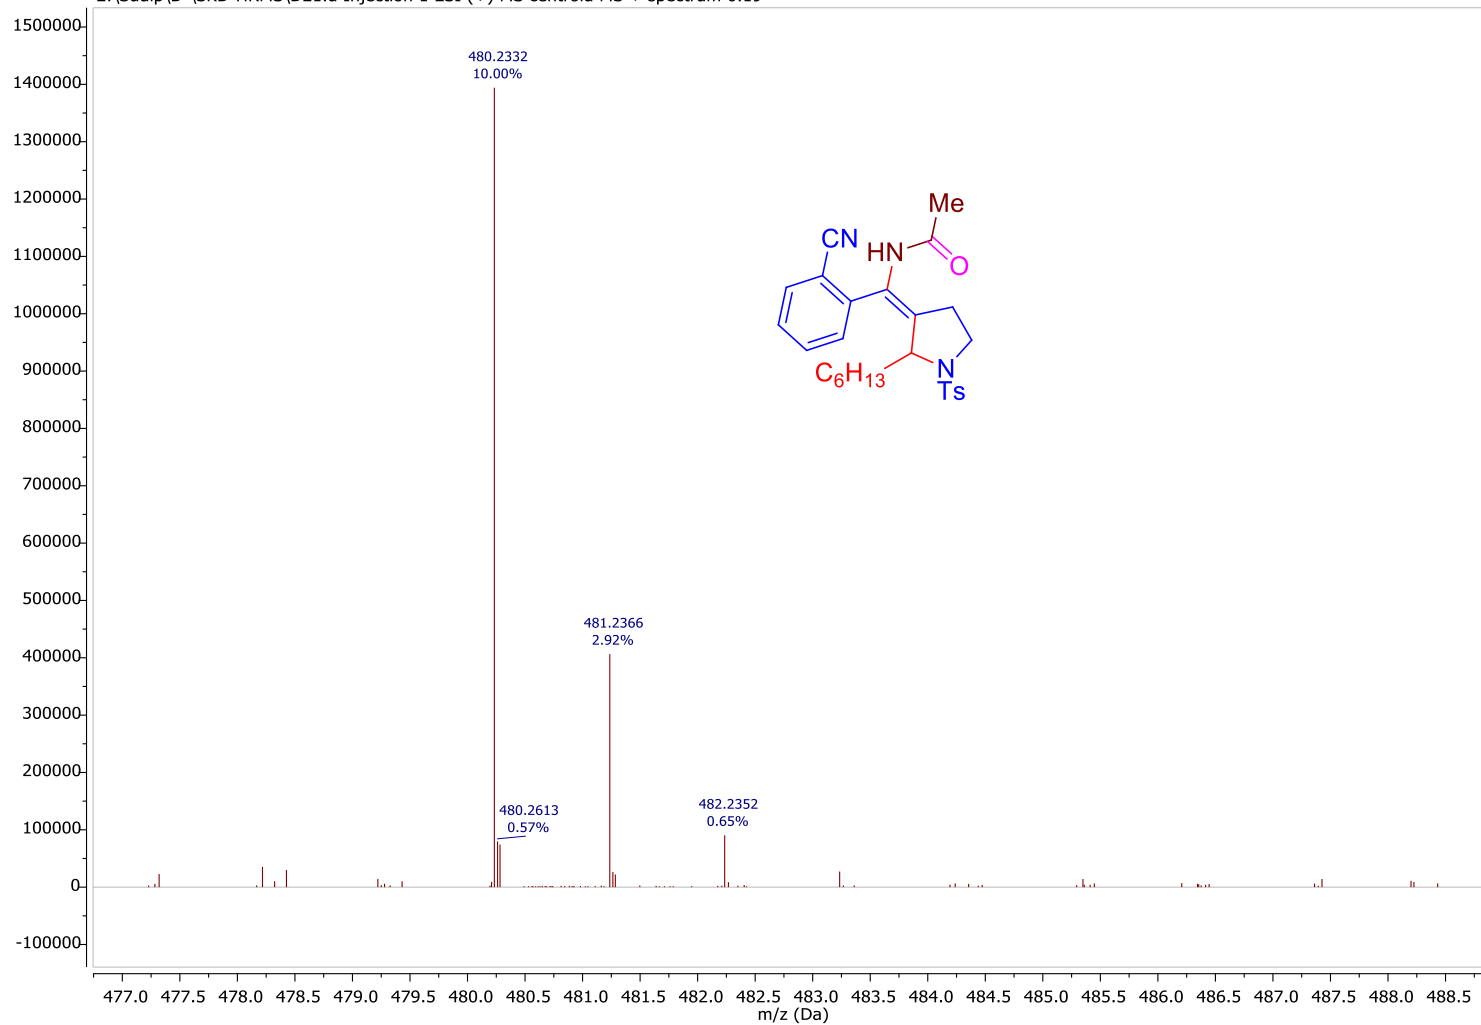

# HRMS spectrum of Z-3bc

C:\Users\CHEL ...LLAV.d\SKD 35.d Injection 1 ESI (+) MS centroid MS + spectrum 0.35

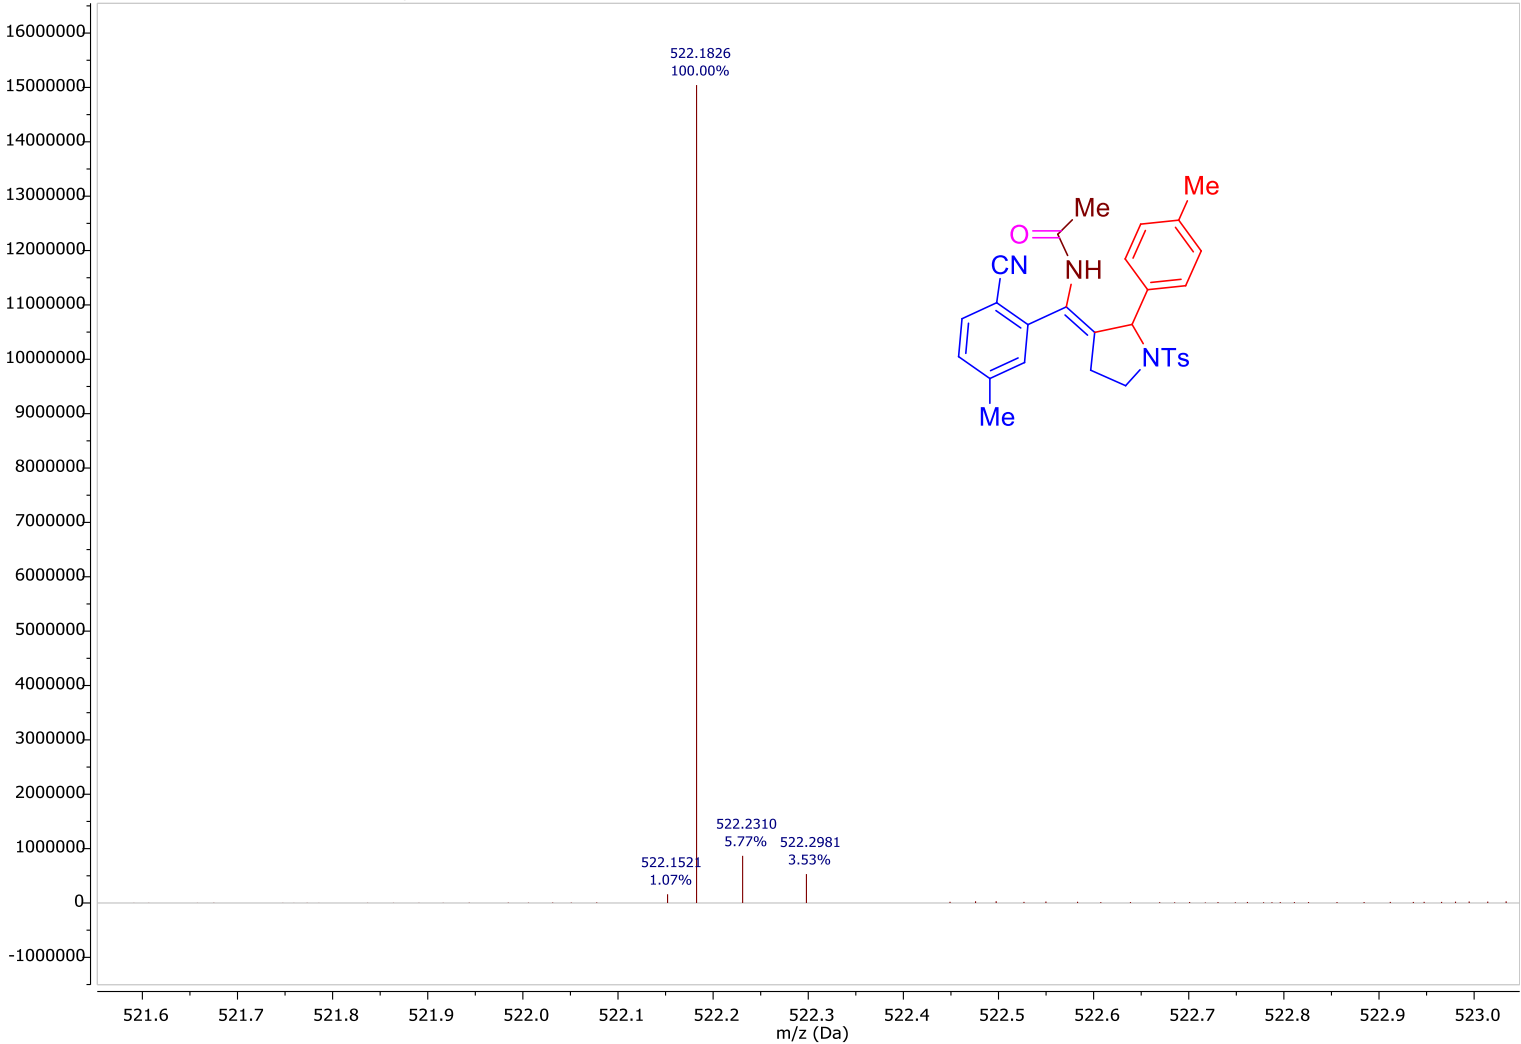

# HRMS spectrum of Z-3ck

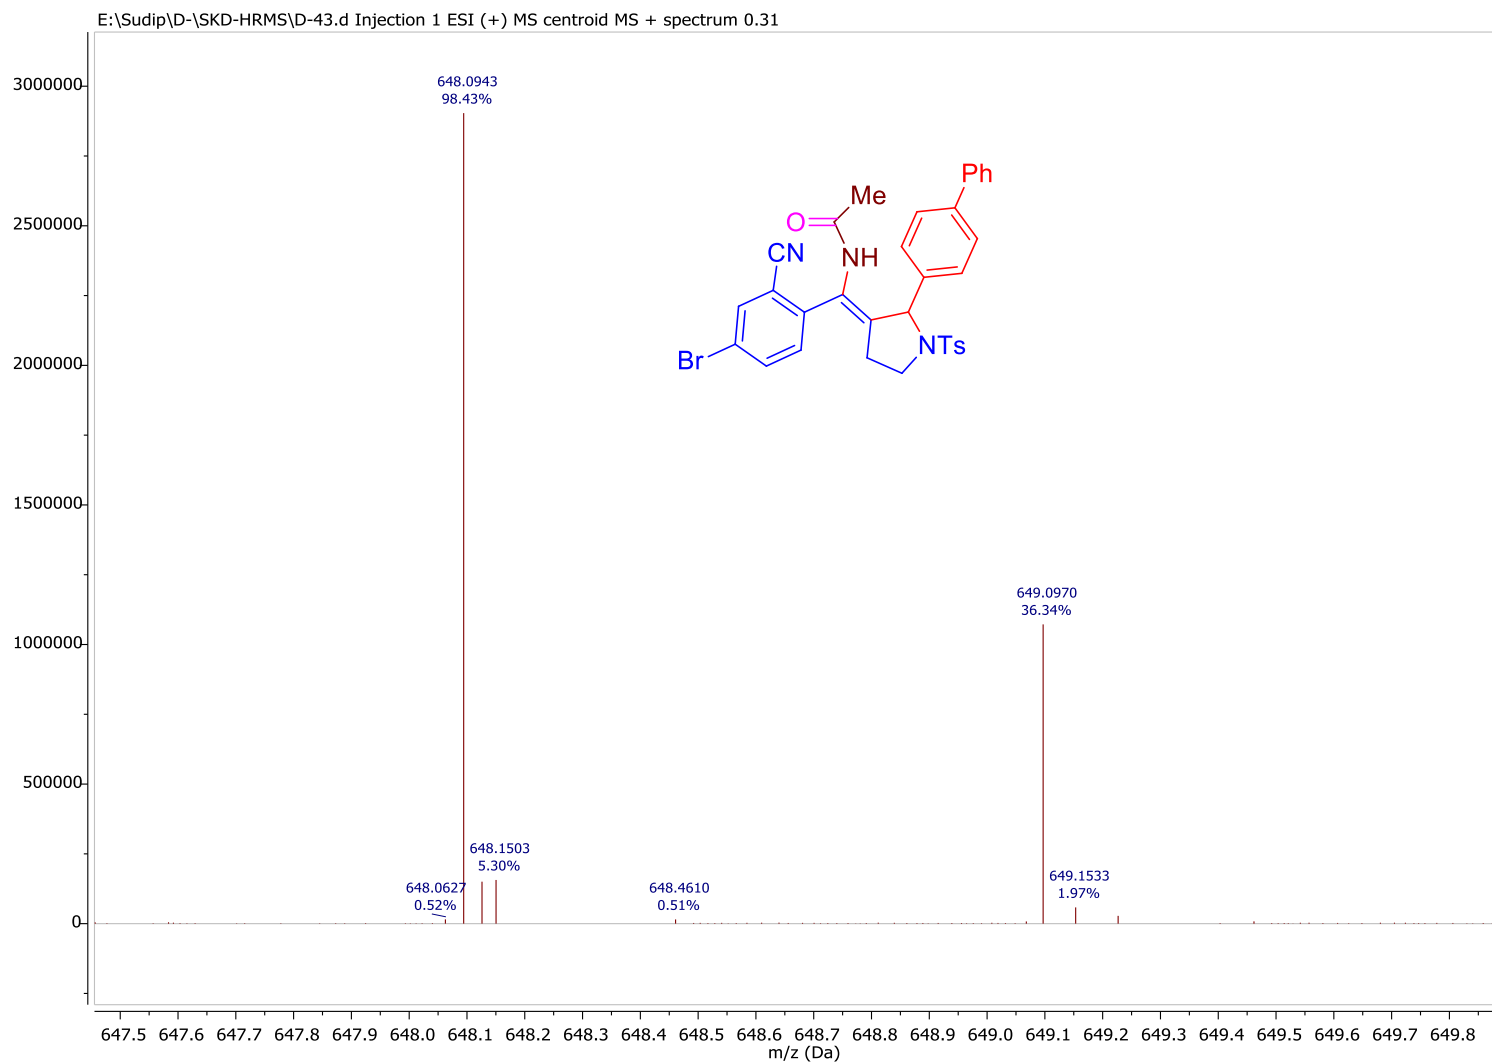

# HRMS spectrum of *E-3c1*

C:\Users\CHEL ...-N2-SM.d\D-51.d Injection 1 ESI (+) MS centroid MS + spectrum 0.34

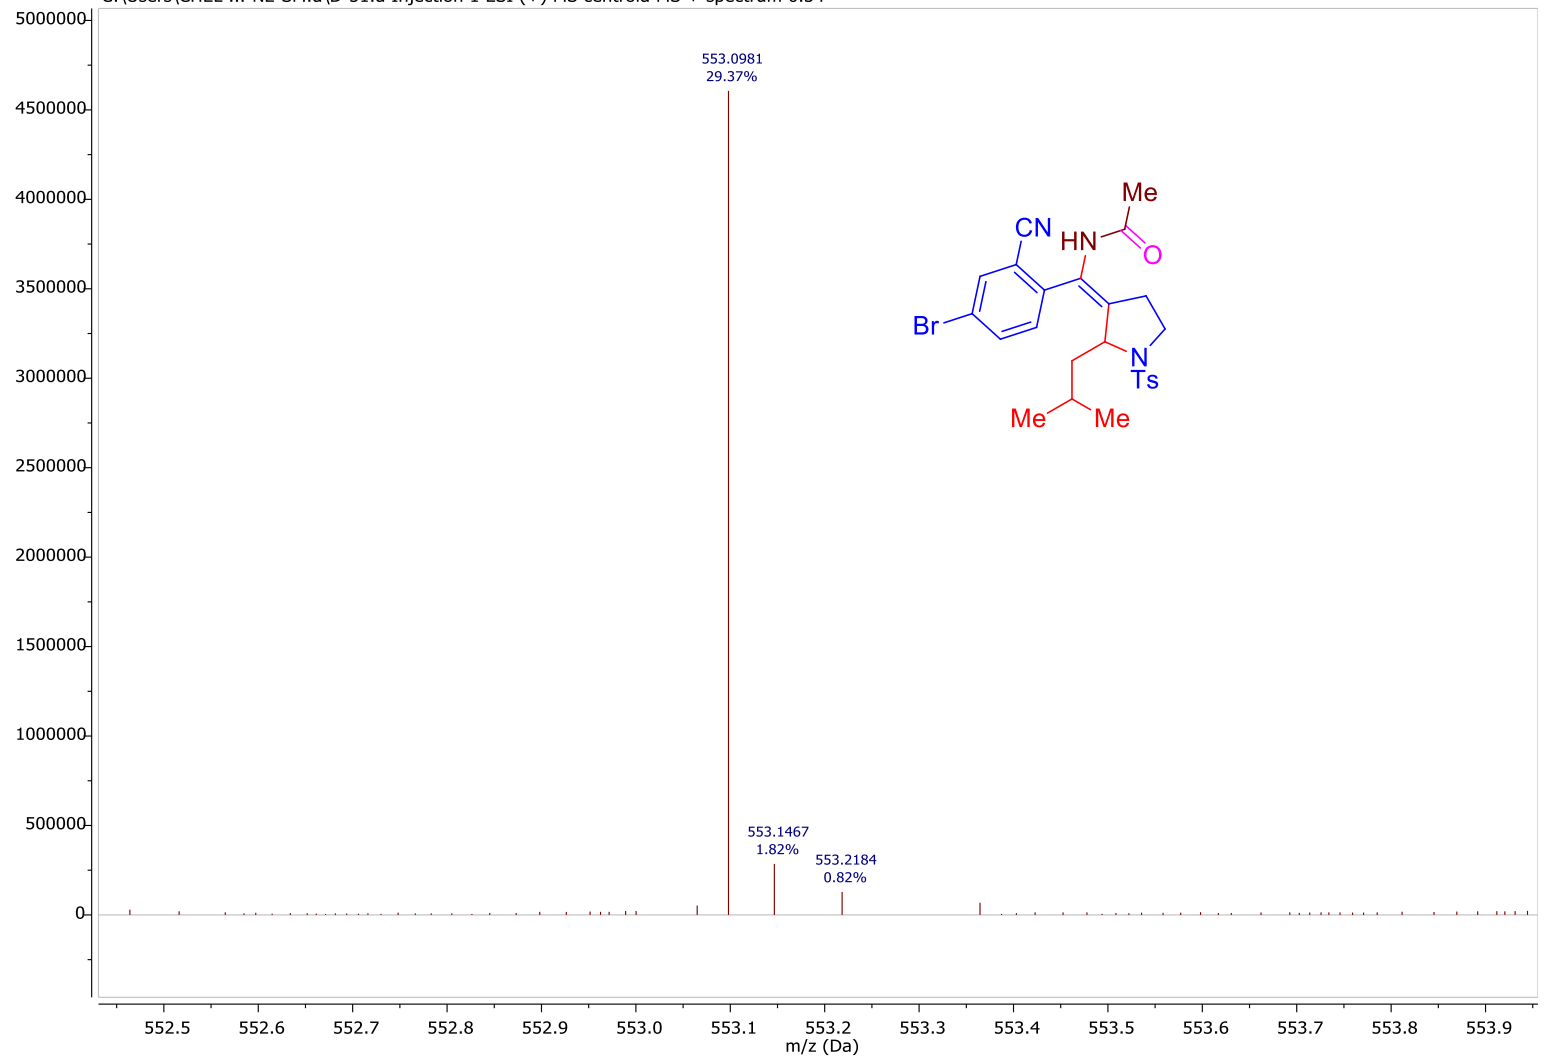

S21

HRMS spectrum of **Z-3dc**

C:\Users\CHEL ...2-SM.d\D-52-R.d Injection 1 ESI (+) MS centroid MS + spectrum 0.20

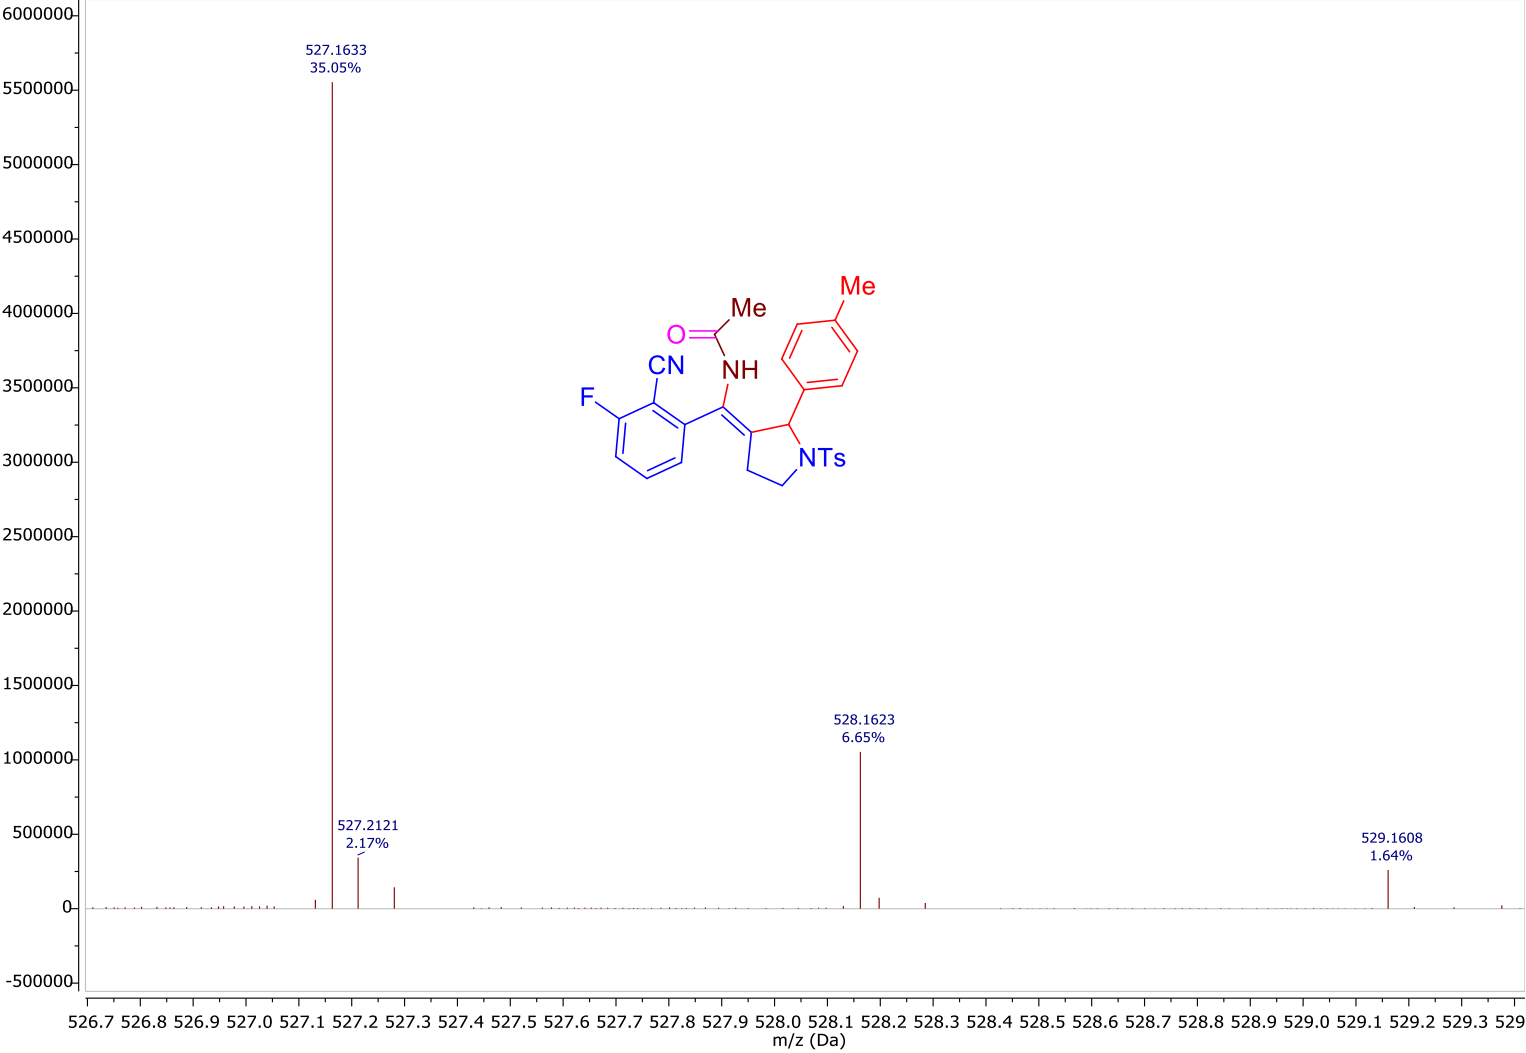

HRMS spectrum of **Z-3dm**

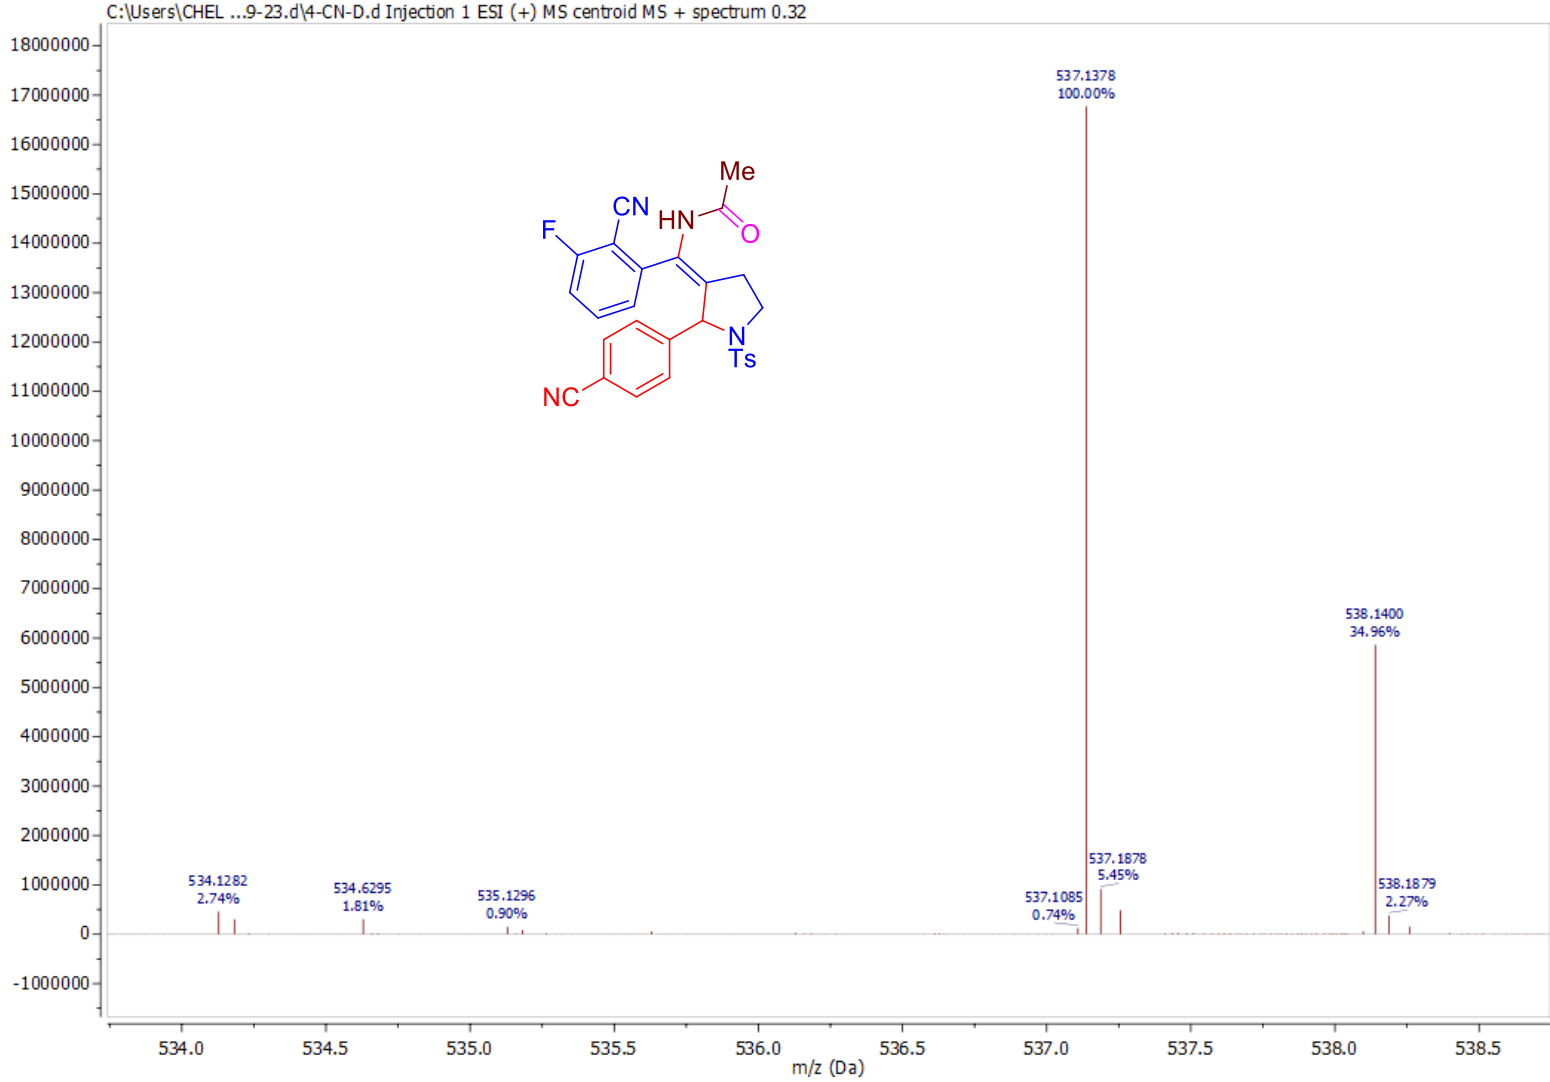

# HRMS spectrum of *E-4ec*

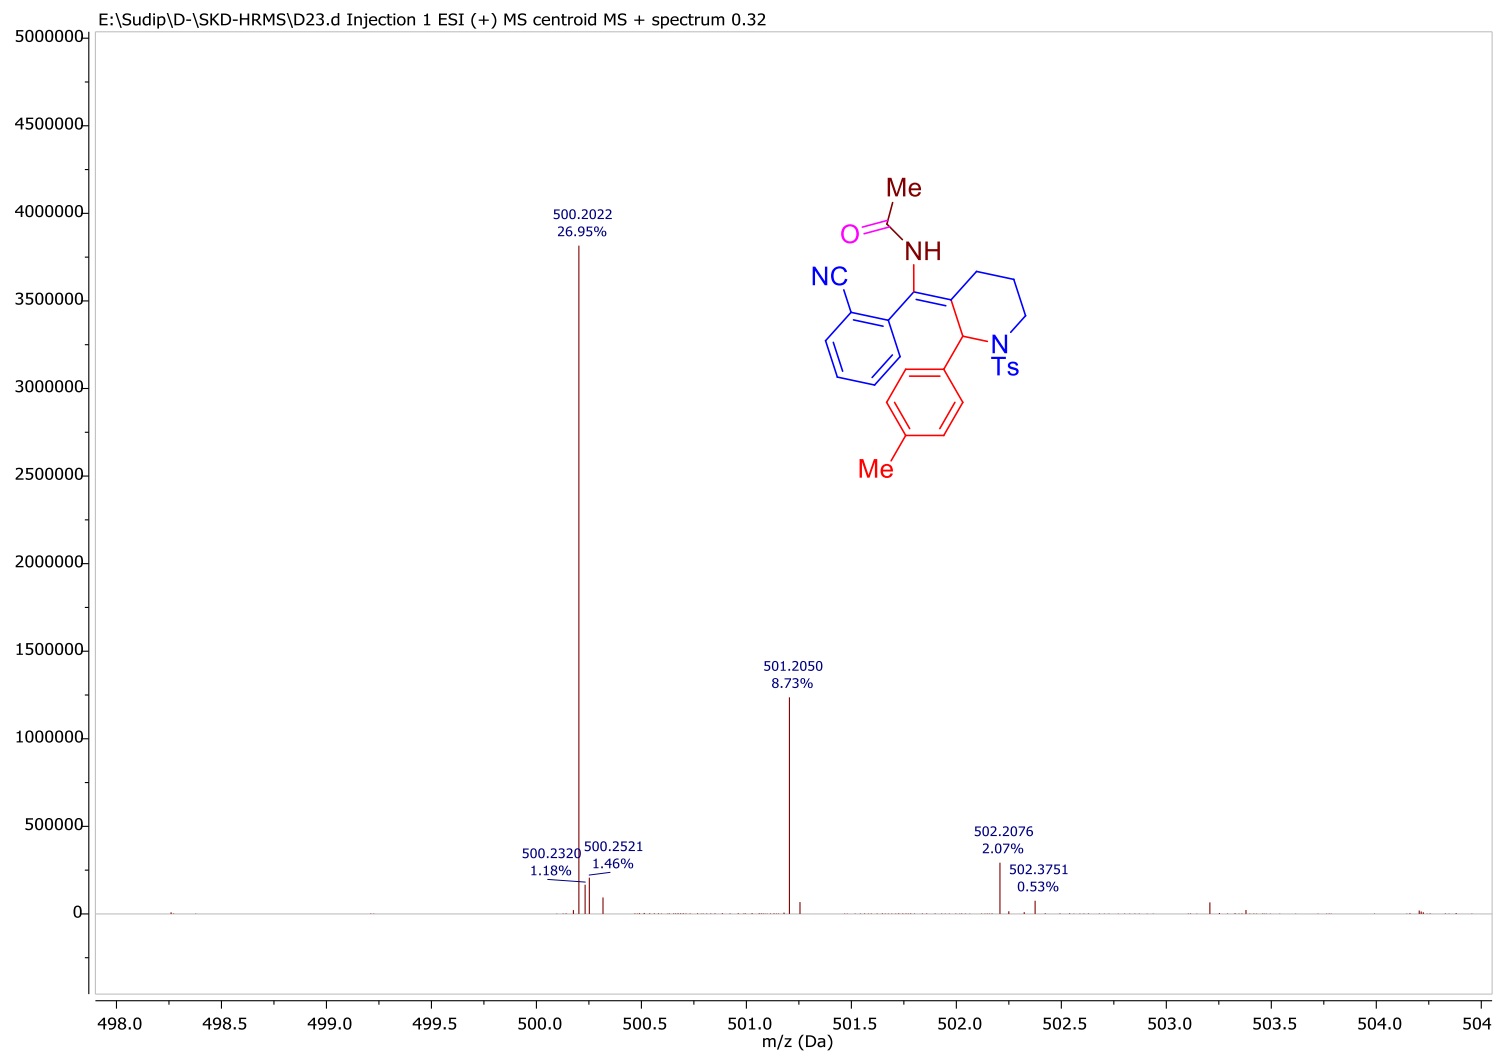



HRMS spectrum of *E-4en*

C:\Users\Sudip...pdated\AKSD54.d Injection 1 ESI (+) MS centroid MS + spectrum 0.25

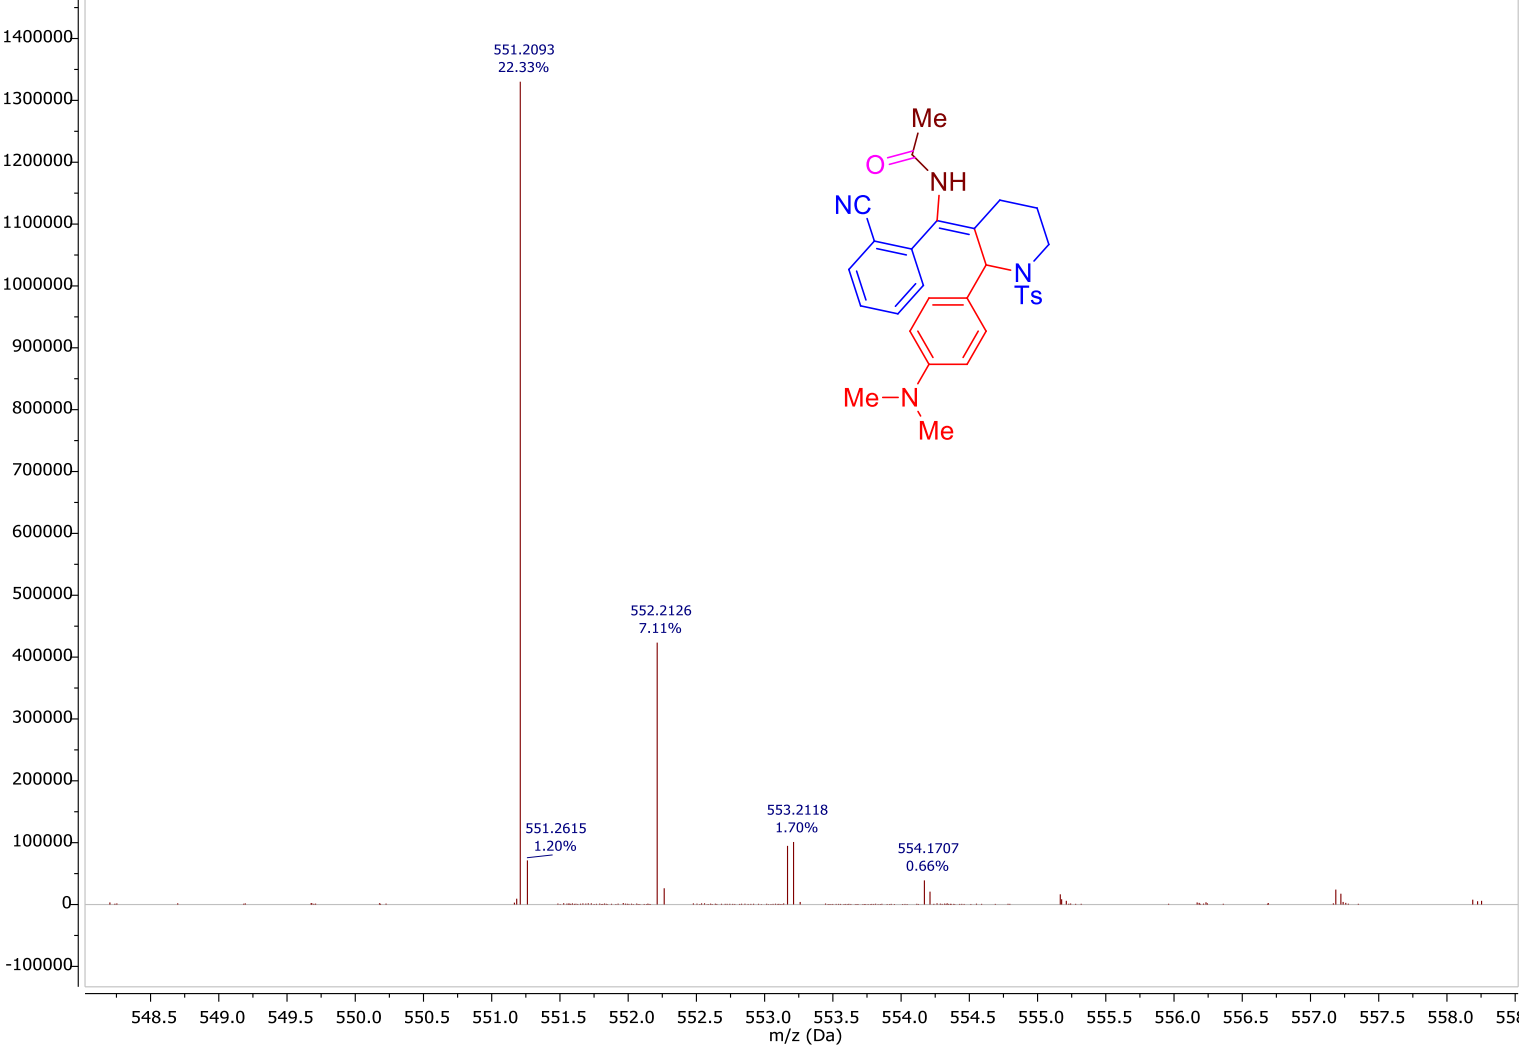

# HRMS Spectrum of *E-4eo*

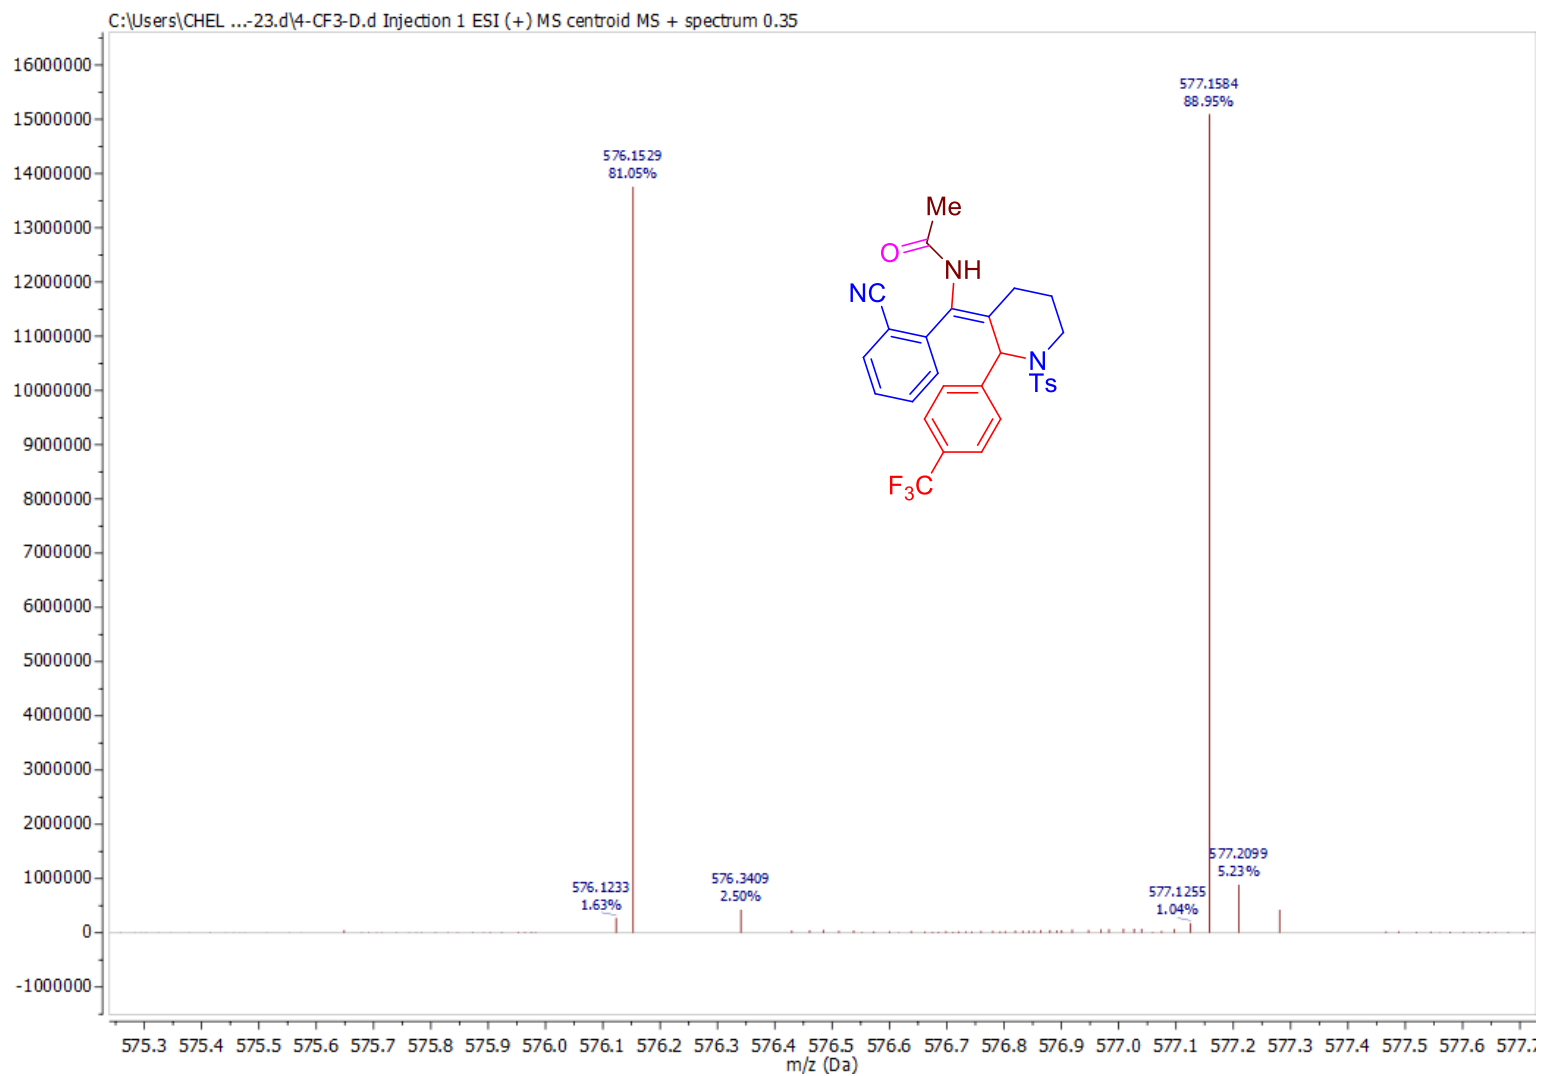

# HRMS spectrum of *E-4el*

E:\Sudip\D-\SK...\S\D-45.d\D-45.d Injection 1 ESI (+) MS centroid MS + spectrum 0.30

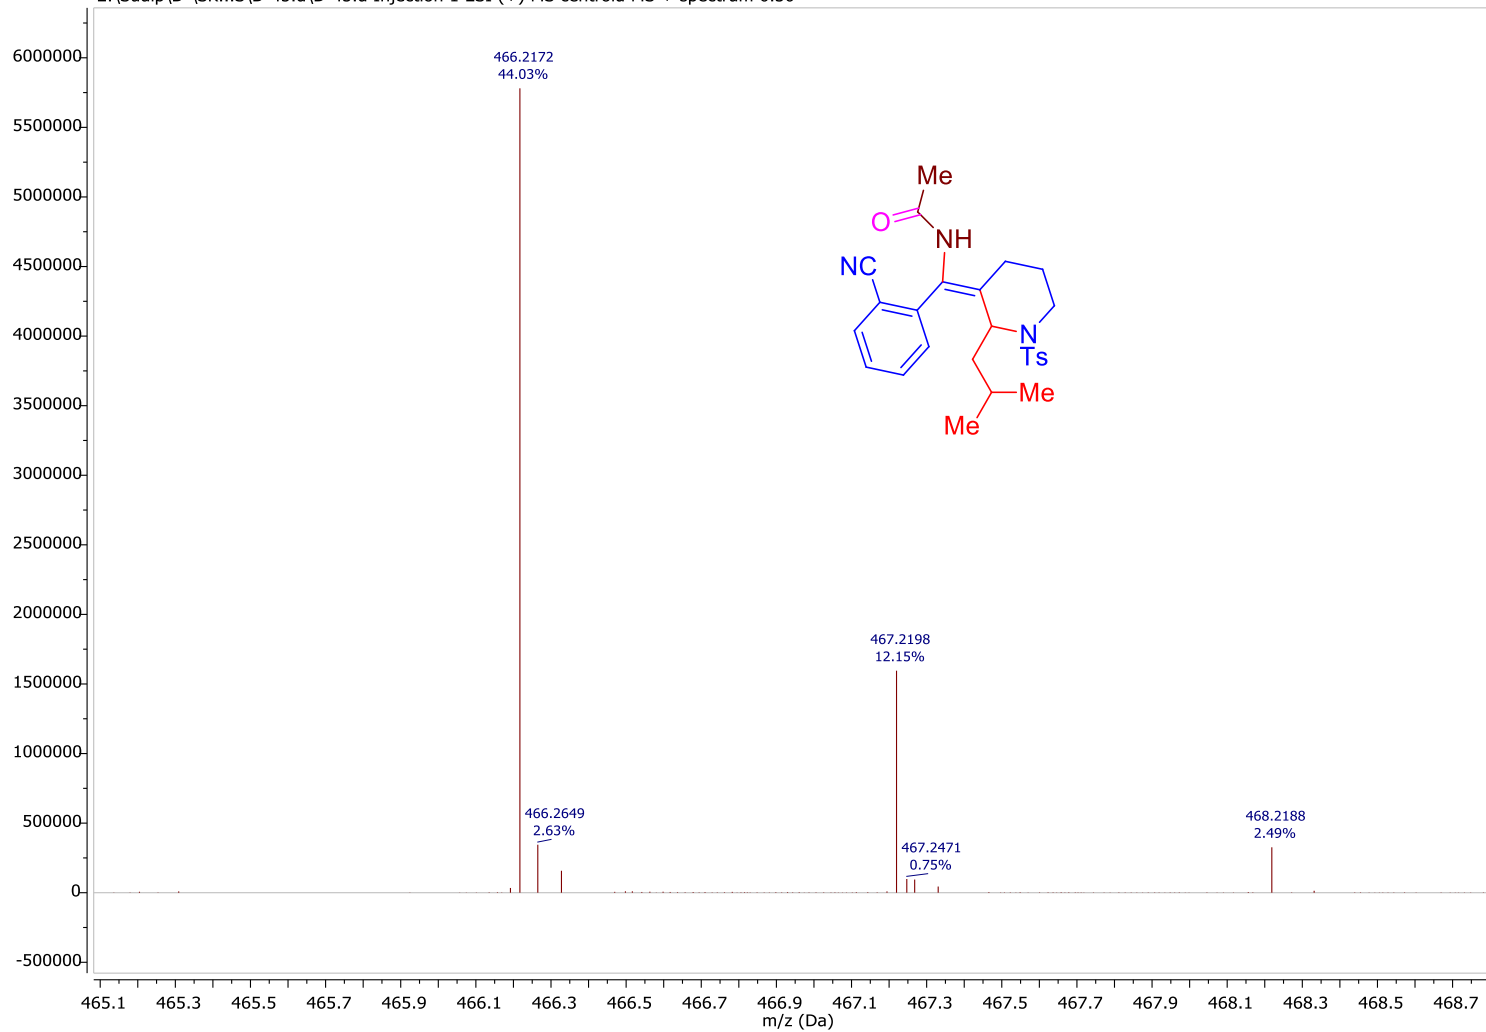

# HRMS spectrum of 5fc

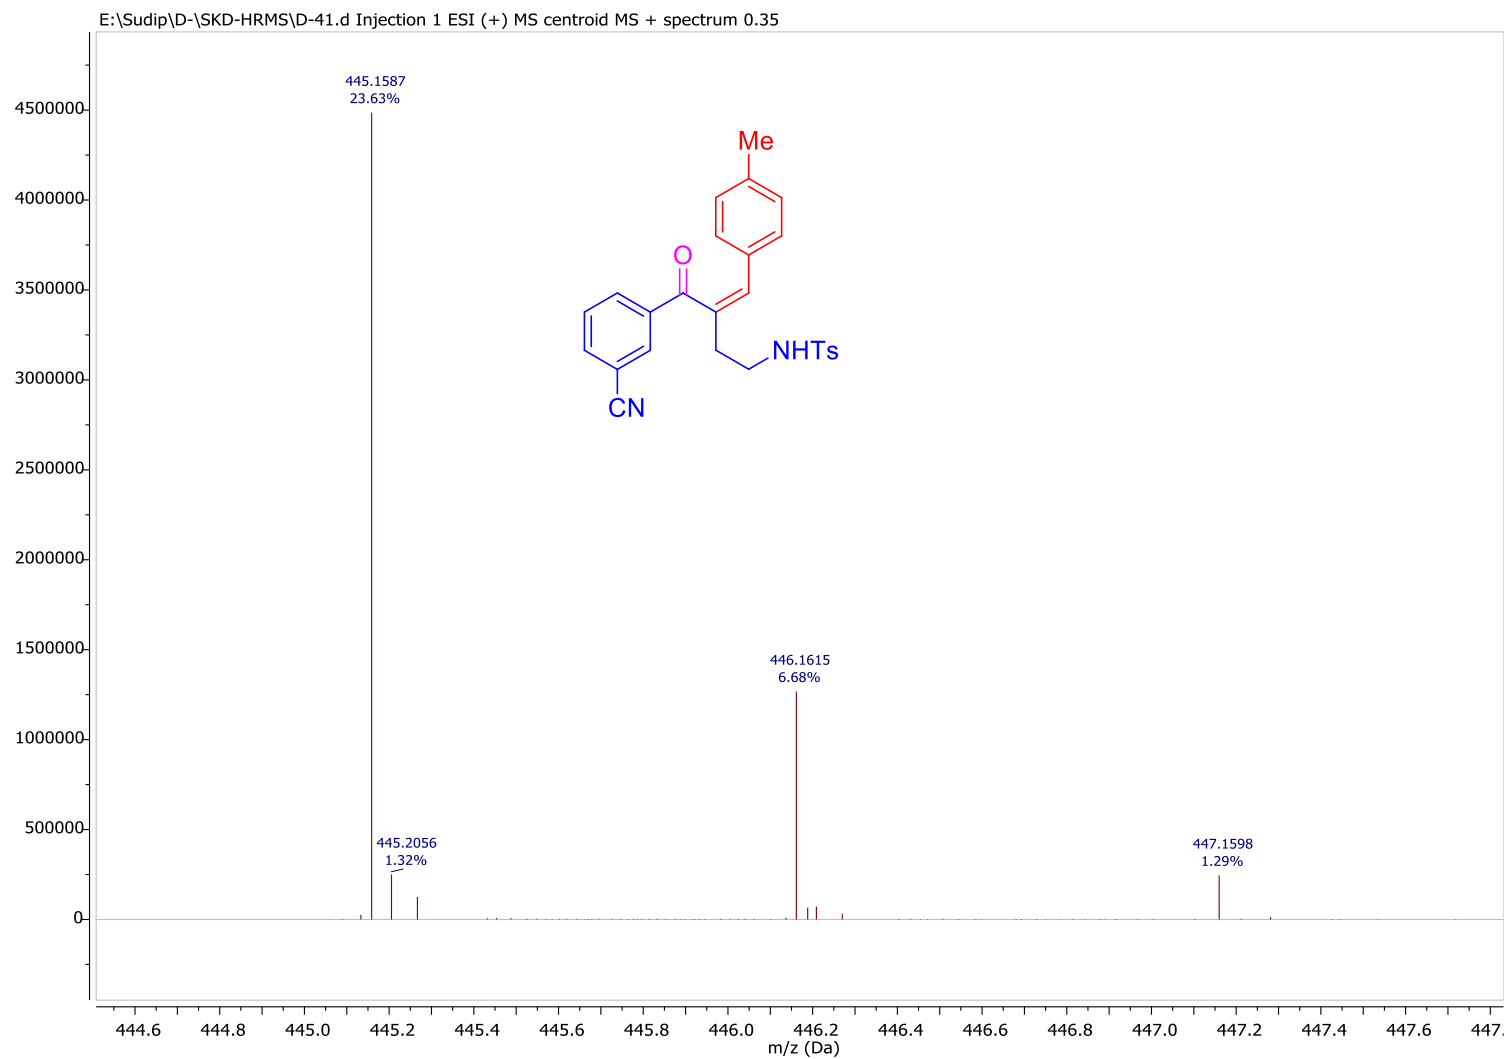

# HRMS spectrum of 5gc

C:\Users\Subha...\AKS-SS-1F-OH.d Injection 1 ESI (+) MS centroid MS + spectrum 0.32

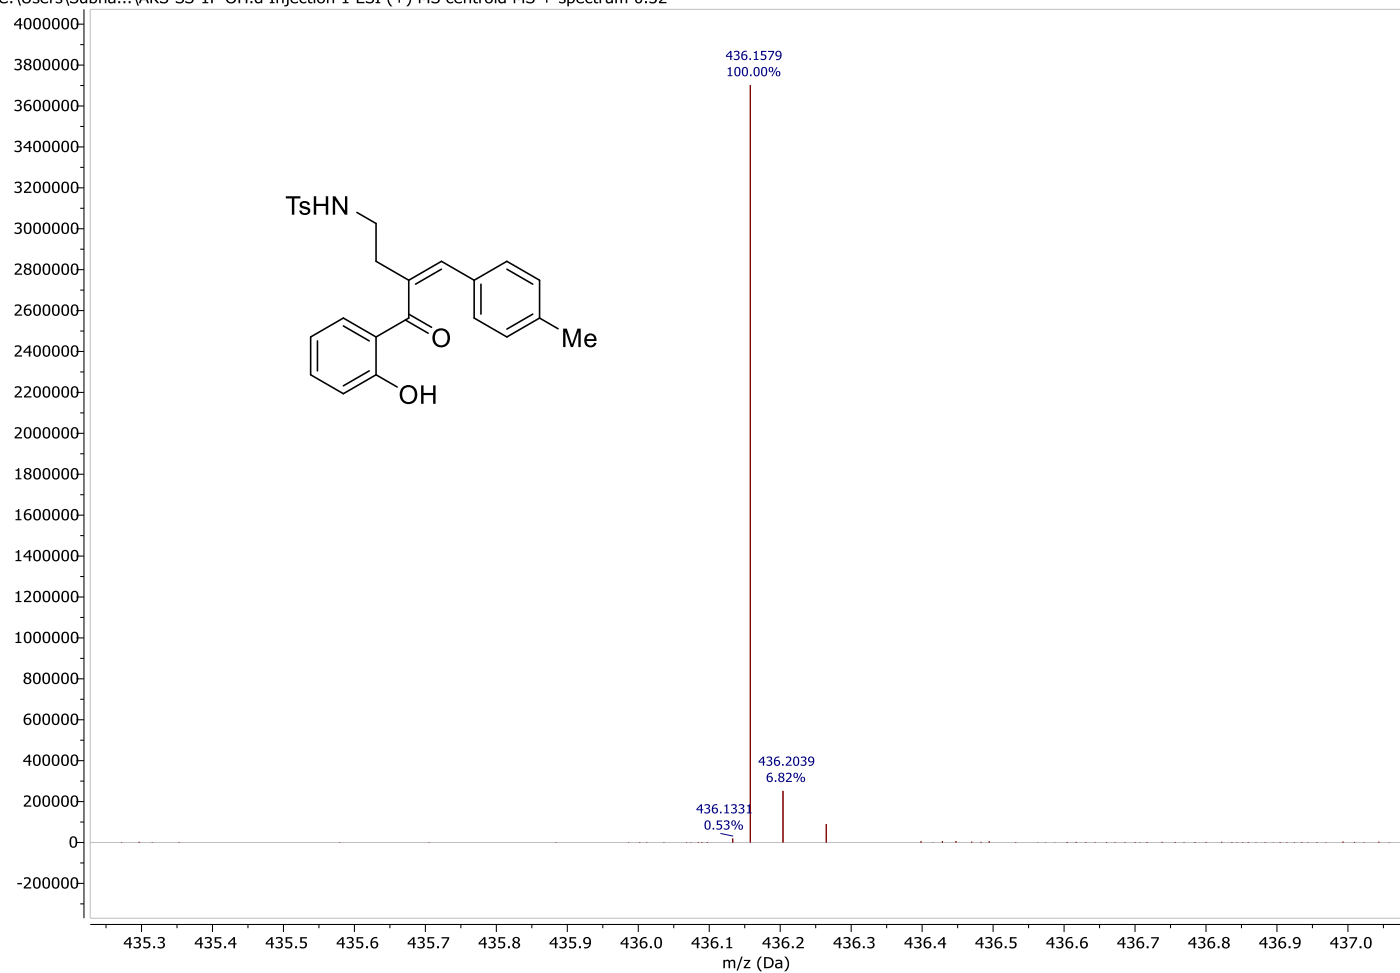

Supplement: d3ob01764h1.pdf [file d3ob01764h1.pdf]
