# Supplementary material for: Nitrile stabilized synthesis of pyrrolidine and piperidine derivatives via tandem alkynyl aza-Prins–Ritter reactions
Source: Royal Society of Chemistry journal article supplement (doi:10.1039/d3ob01764h), 2023-12-14

Supporting Information for Publication

**Nitrile Stabilized Synthesis of Pyrrolidine and Piperidine Derivatives via Tandem Alkynyl aza Prins-Ritter Reactions**

Sudip Shit, Chinmayee Choudhury and Anil K. Saikia\*

Department of Chemistry, Indian Institute of Technology Guwahati, Guwahati 781039, Assam, India.

Email: [asaikia@iitg.ac.in](mailto:asaikia@iitg.ac.in)

**Contents**

- |                                                                                    |         |
|------------------------------------------------------------------------------------|---------|
| 1. $^1\text{H}$ , $^{13}\text{C}$ and $^{19}\text{F}$ spectra of all new compounds | S2-S53  |
| 2. Crude $^1\text{H}$ NMR spectrum of <b>3dm</b>                                   | S54-S54 |
| 3. X-ray crystallographic data of compound <b><i>E</i>-3ad</b>                     | S55-S57 |

$^1\text{H}$  (500 MHz,  $\text{CDCl}_3$ ) and  $^{13}\text{C}\{^1\text{H}\}$  (125 MHz,  $\text{CDCl}_3$ ) spectra of **1a**

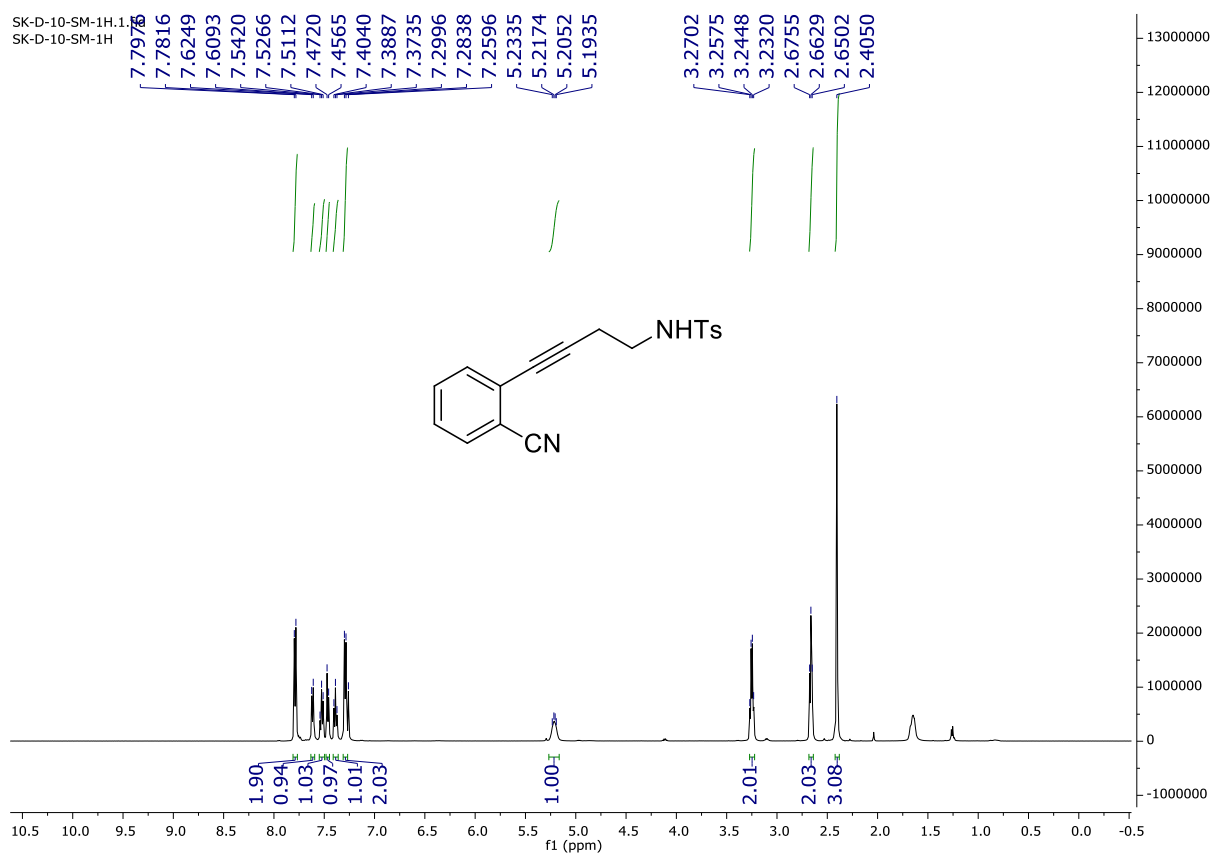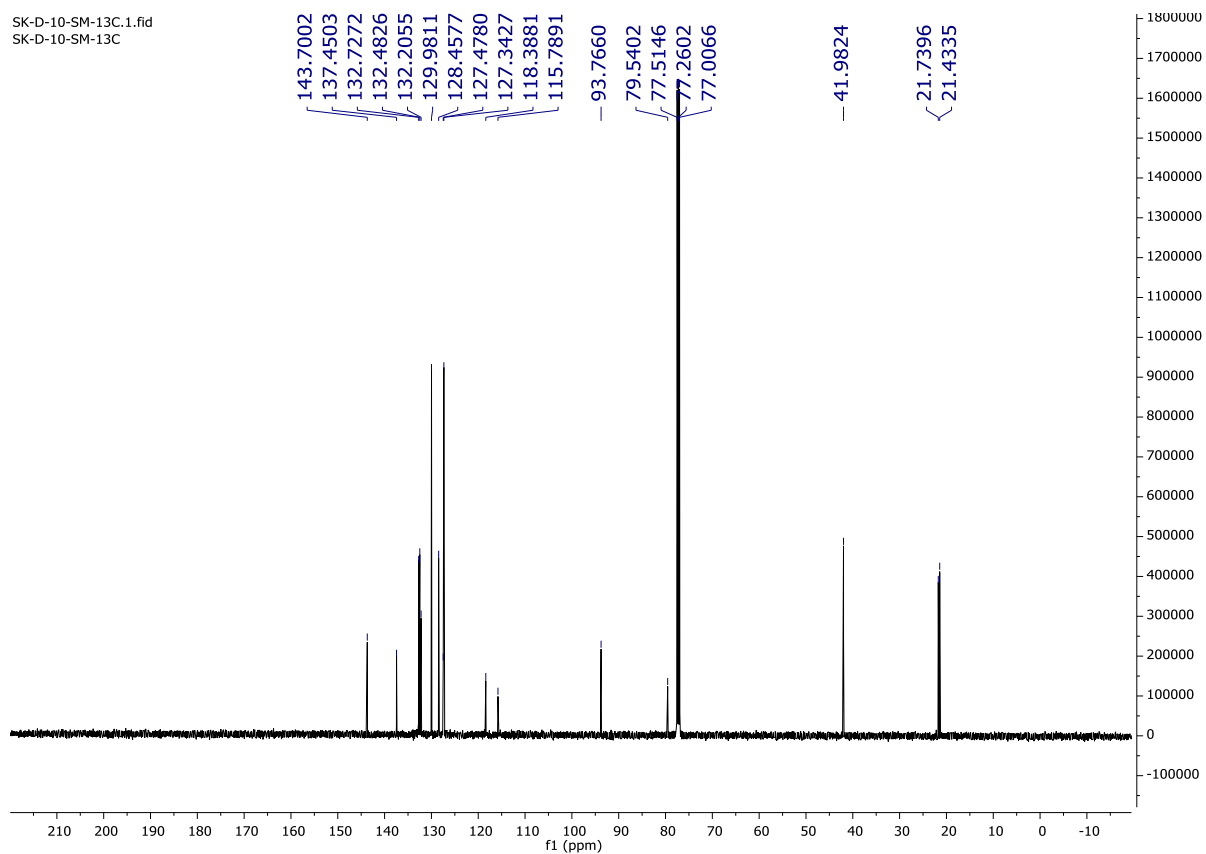

$^1\text{H}$  (400 MHz,  $\text{CDCl}_3$ ) and  $^{13}\text{C}\{^1\text{H}\}$  (125 MHz,  $\text{CDCl}_3$ ) spectra of **1b**

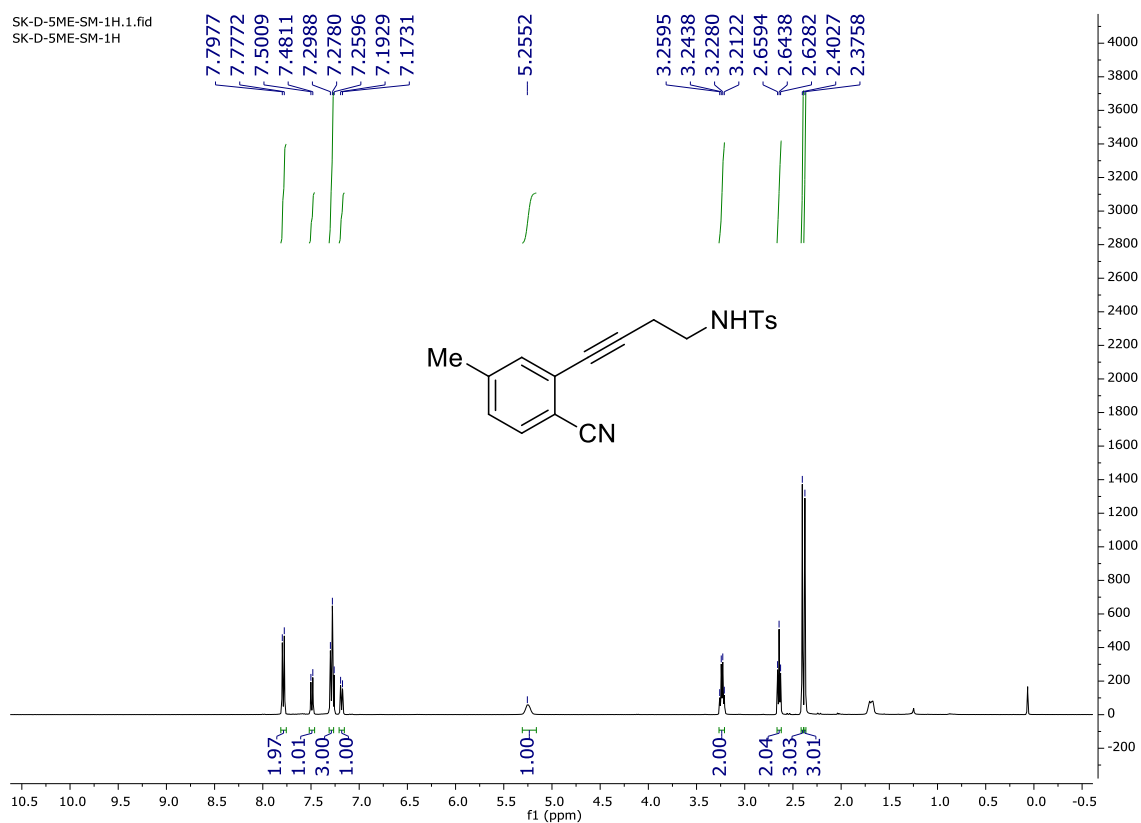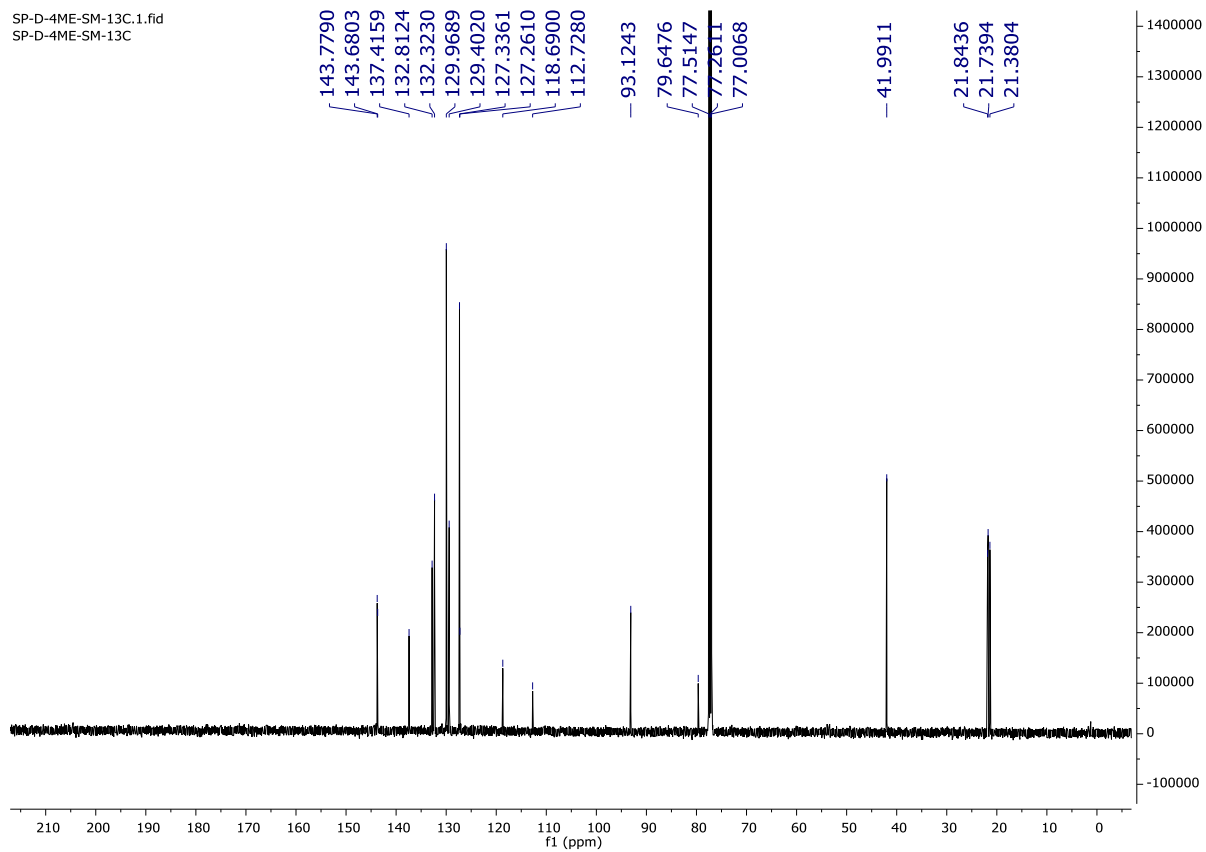

$^1\text{H}$  (400 MHz,  $\text{CDCl}_3$ ) and  $^{13}\text{C}\{^1\text{H}\}$  (125 MHz,  $\text{CDCl}_3$ ) spectra of **1c**

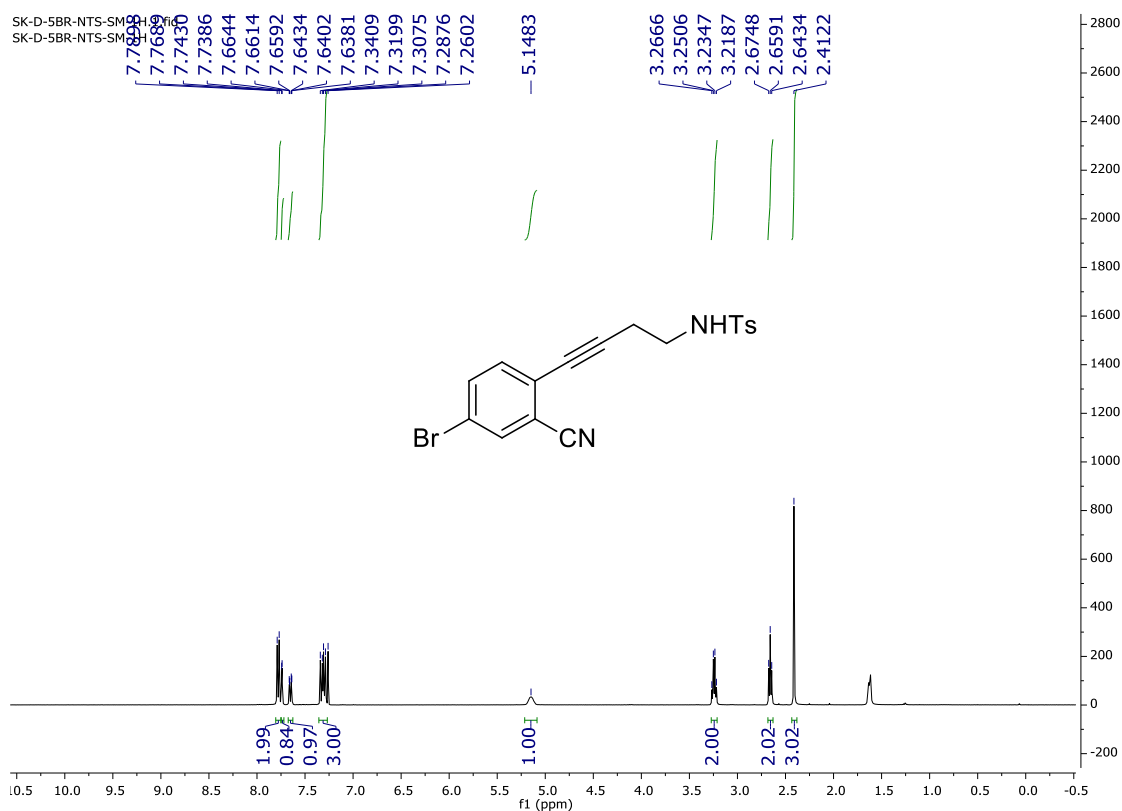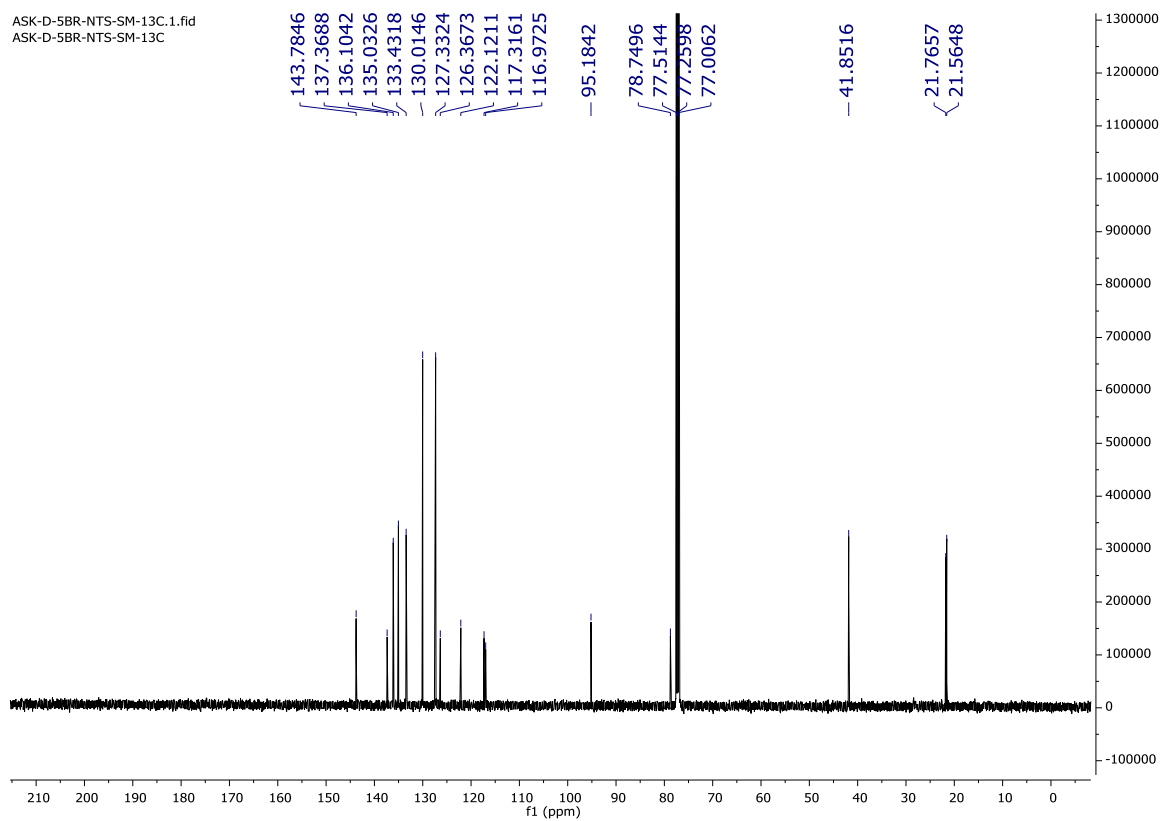

$^1\text{H}$  (400 MHz,  $\text{CDCl}_3$ ) and  $^{13}\text{C}\{^1\text{H}\}$  (125 MHz,  $\text{CDCl}_3$ ) spectra of **1d**

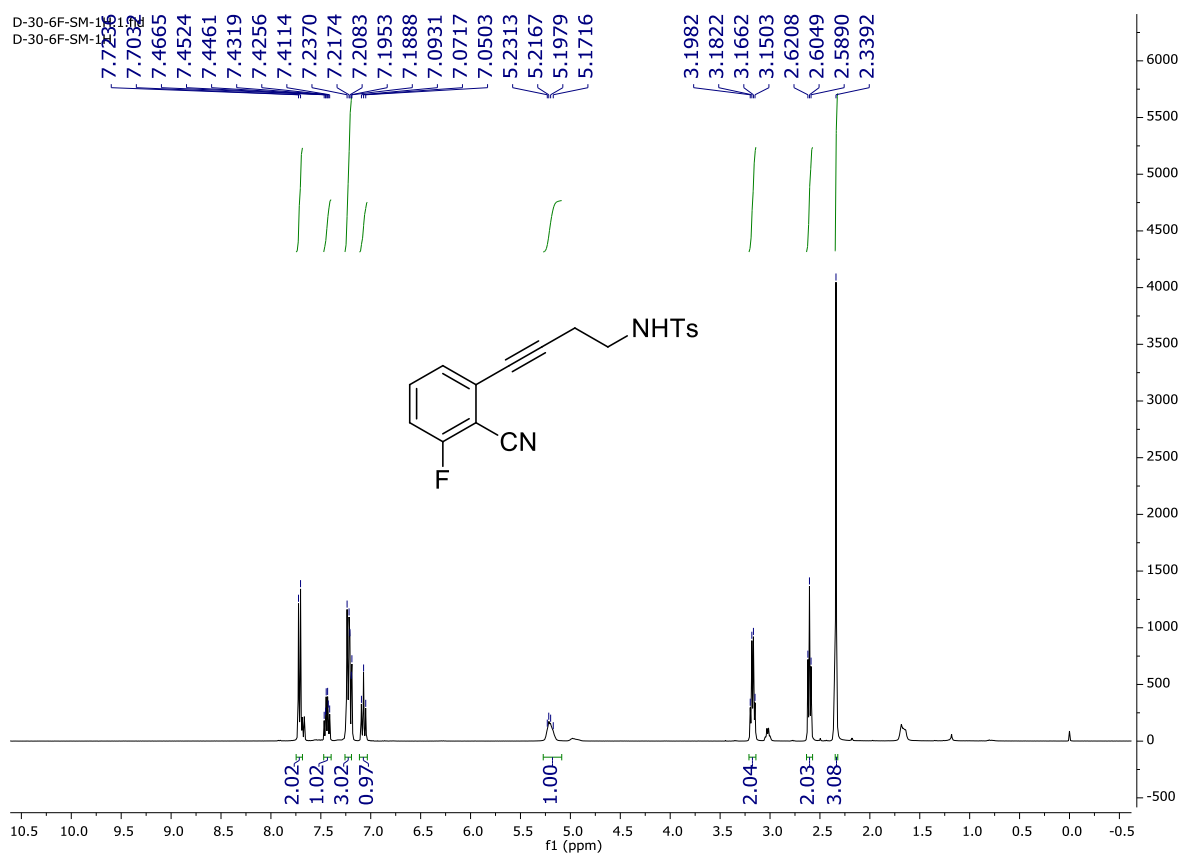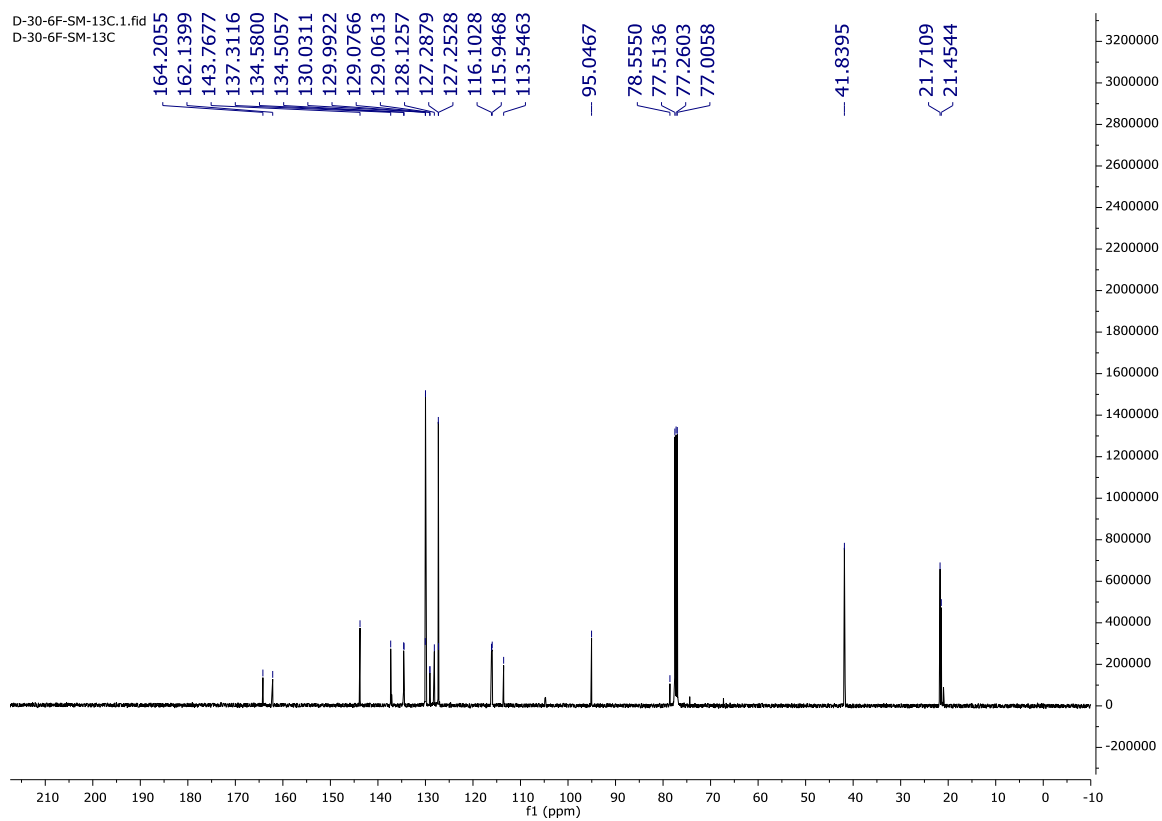

$^{19}\text{F}$  (377 MHz,  $\text{CDCl}_3$ ) spectrum of **1d**

D-30-6F-SM-19F.3.fid  
D-30-6F-SM-19F

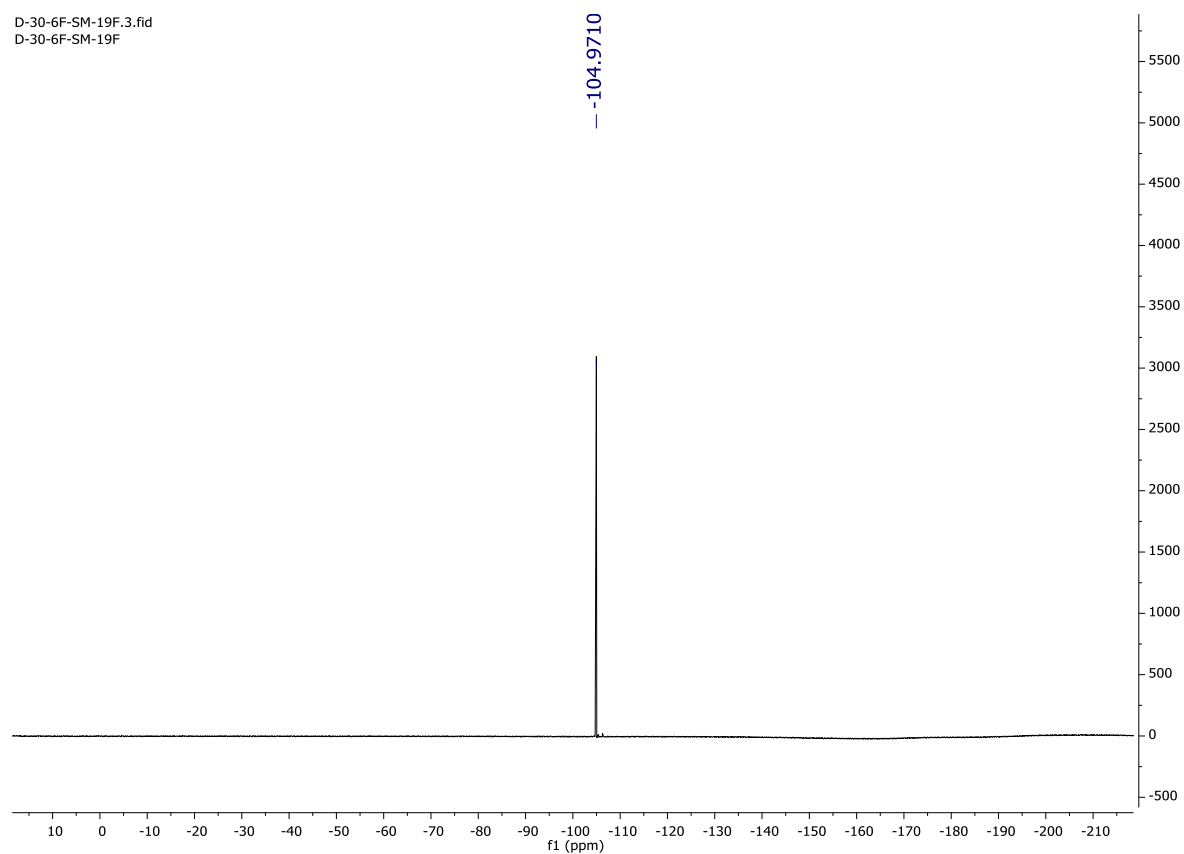

$^1\text{H}$  (400 MHz,  $\text{CDCl}_3$ ) and  $^{13}\text{C}\{^1\text{H}\}$  (125 MHz,  $\text{CDCl}_3$ ) spectra of **1e**

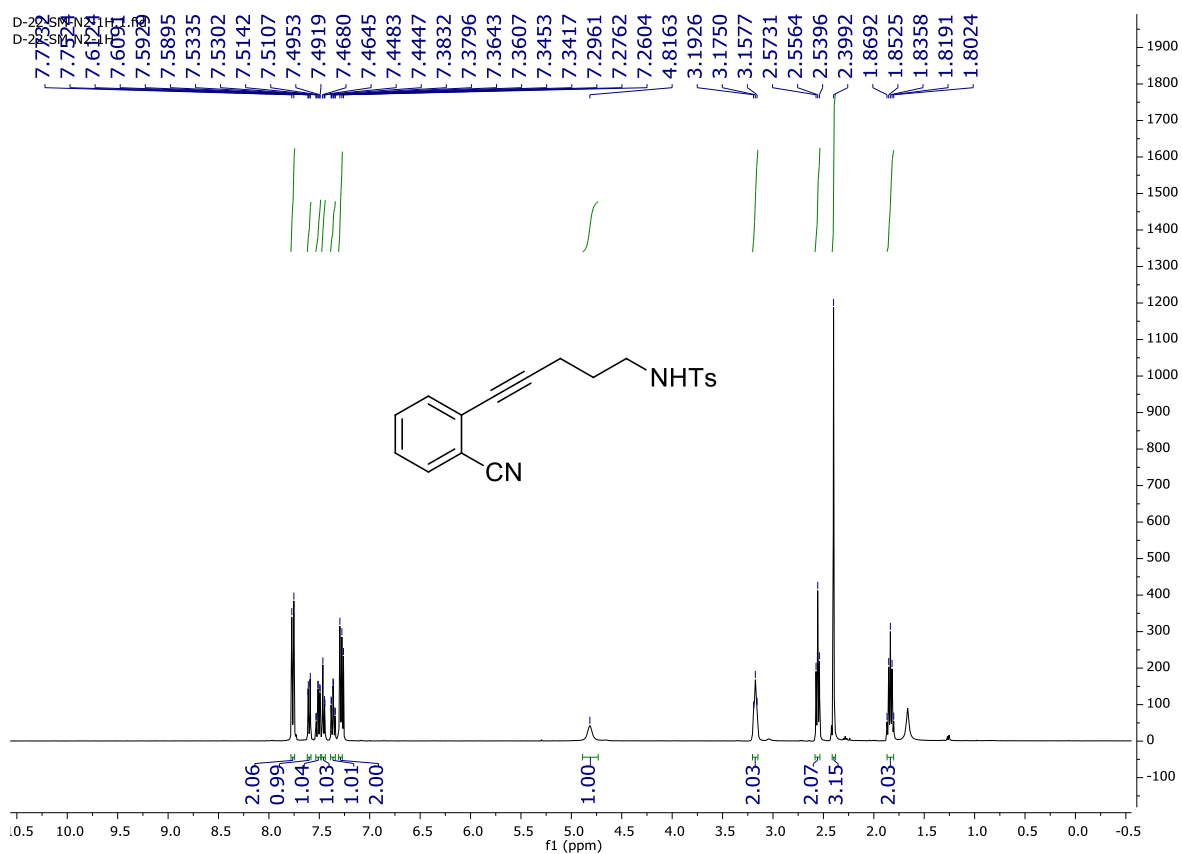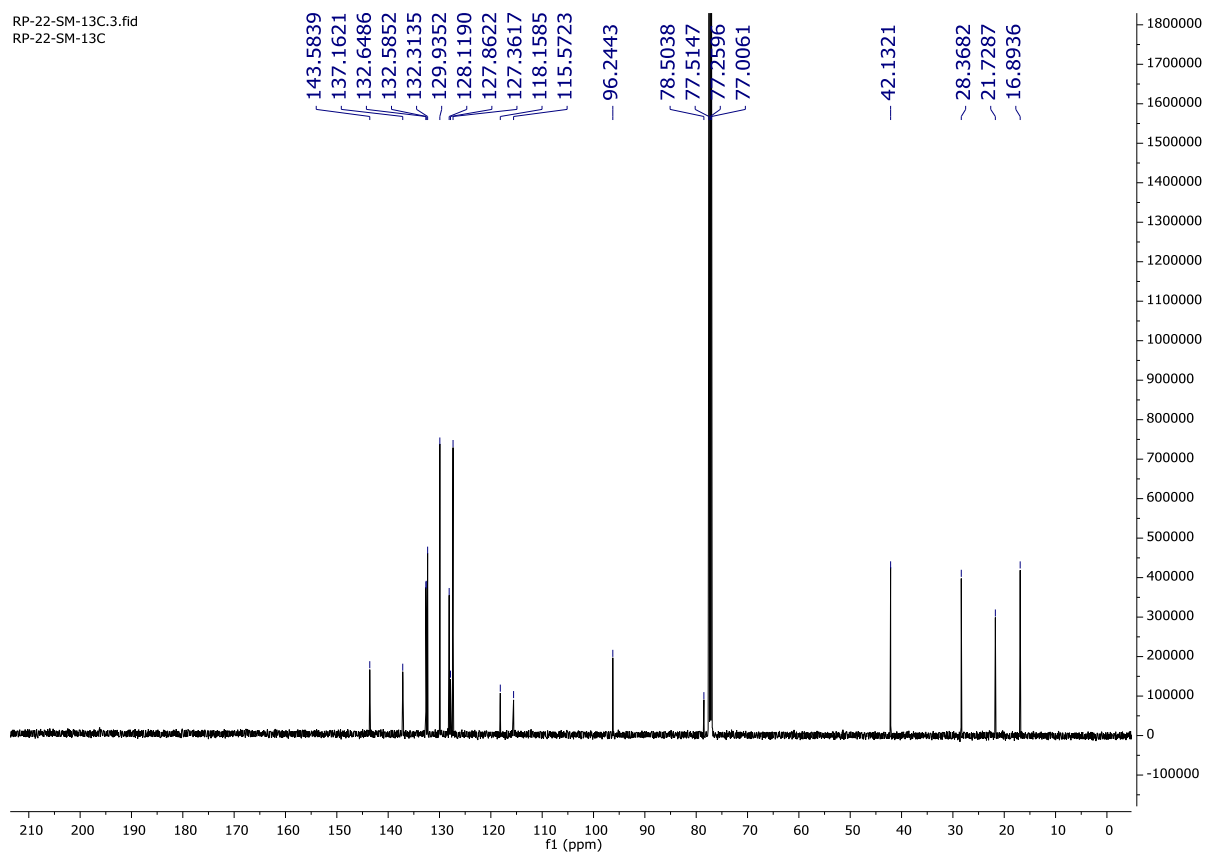

$^1\text{H}$  (400 MHz,  $\text{CDCl}_3$ ) and  $^{13}\text{C}\{^1\text{H}\}$  (125 MHz,  $\text{CDCl}_3$ ) NMR spectra of **1f**

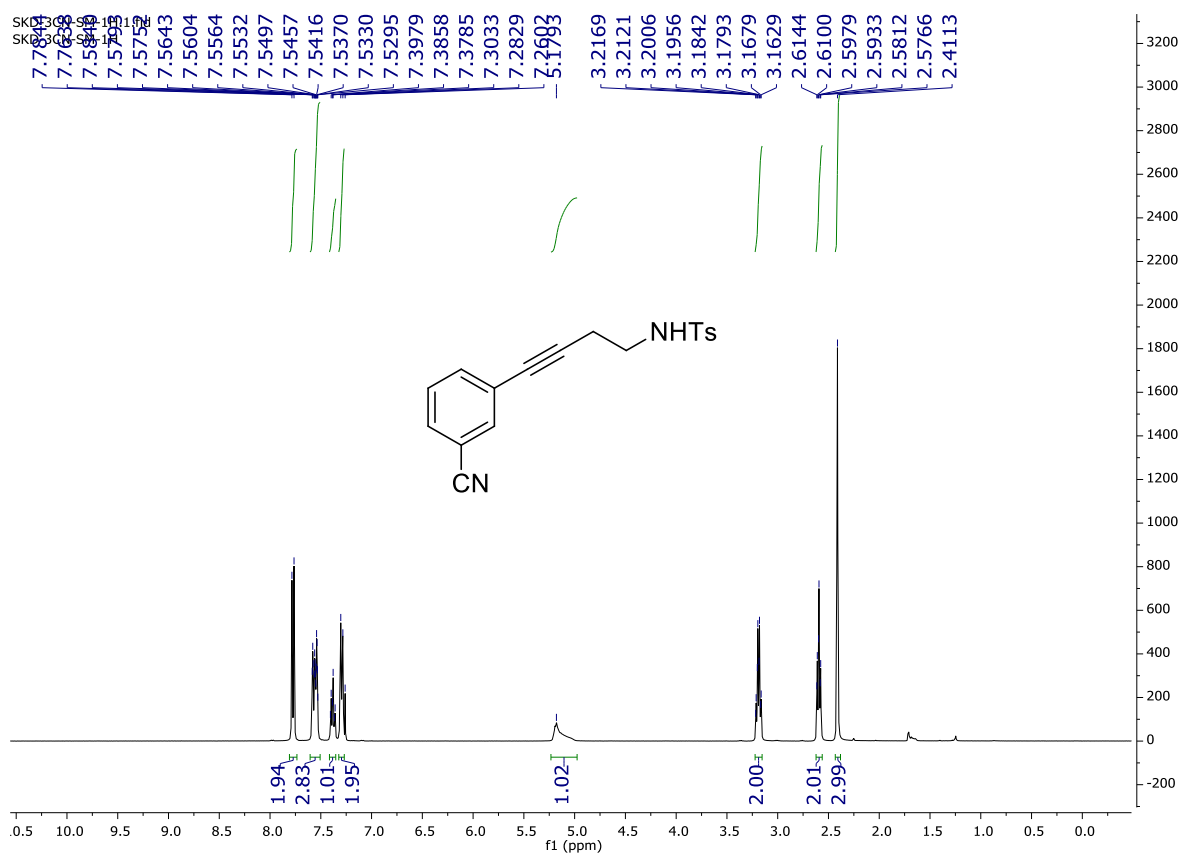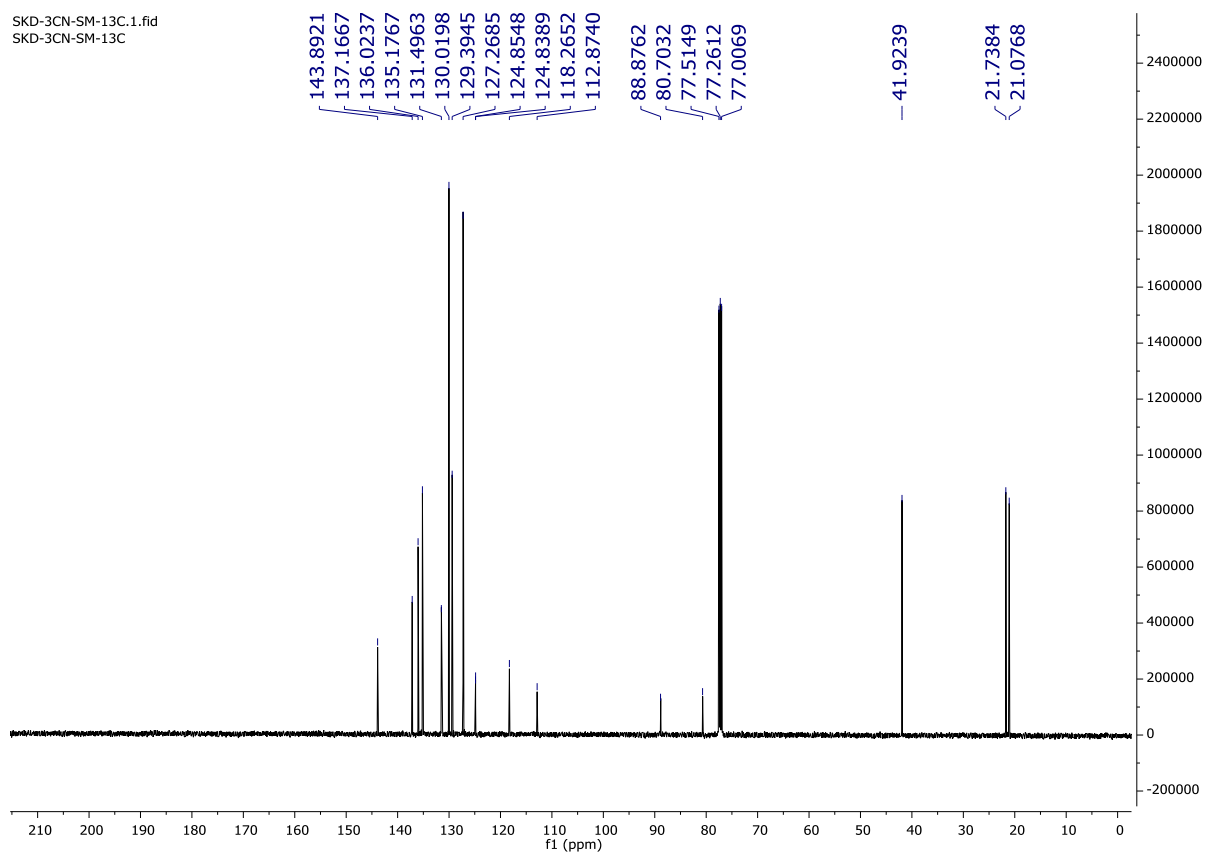



$^1\text{H}$  (500 MHz,  $\text{CDCl}_3$ ) and  $^{13}\text{C}\{^1\text{H}\}$  (125 MHz,  $\text{CDCl}_3$ ) NMR spectra of **1g**

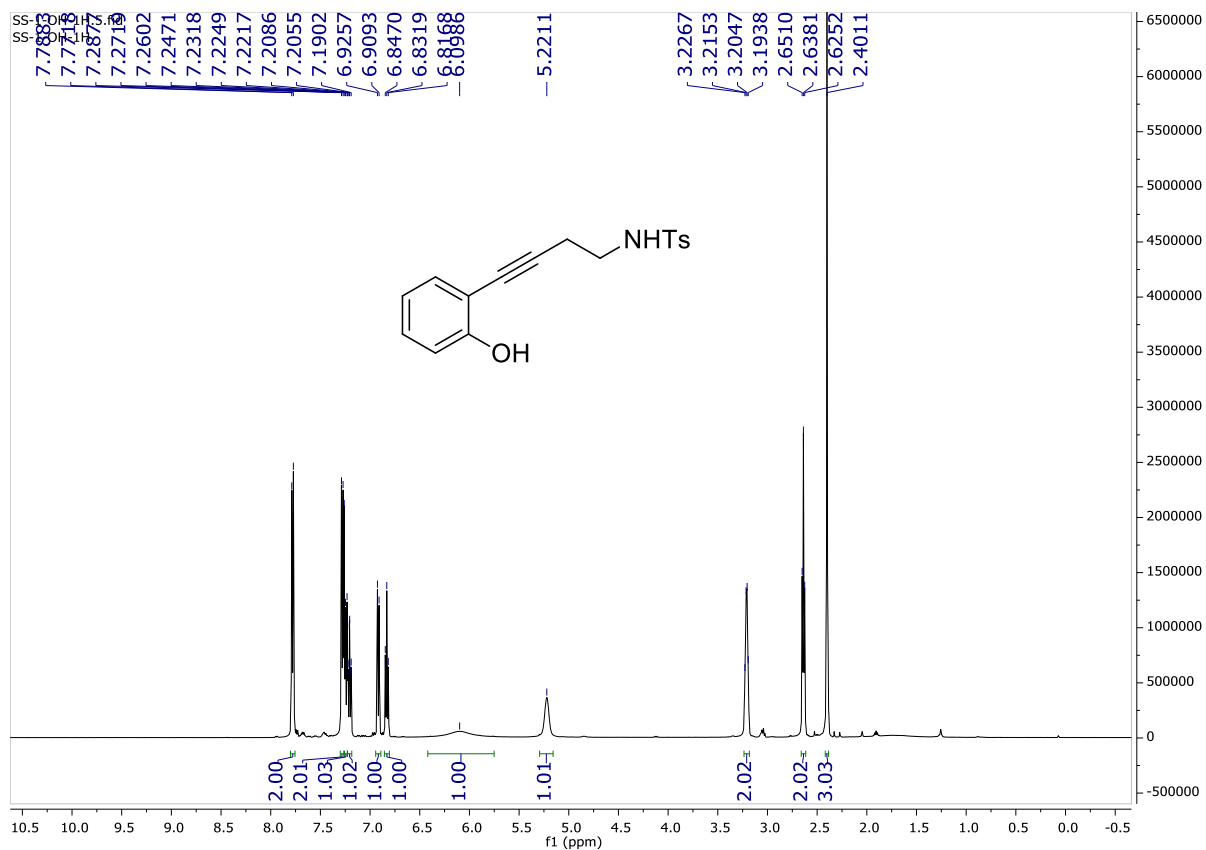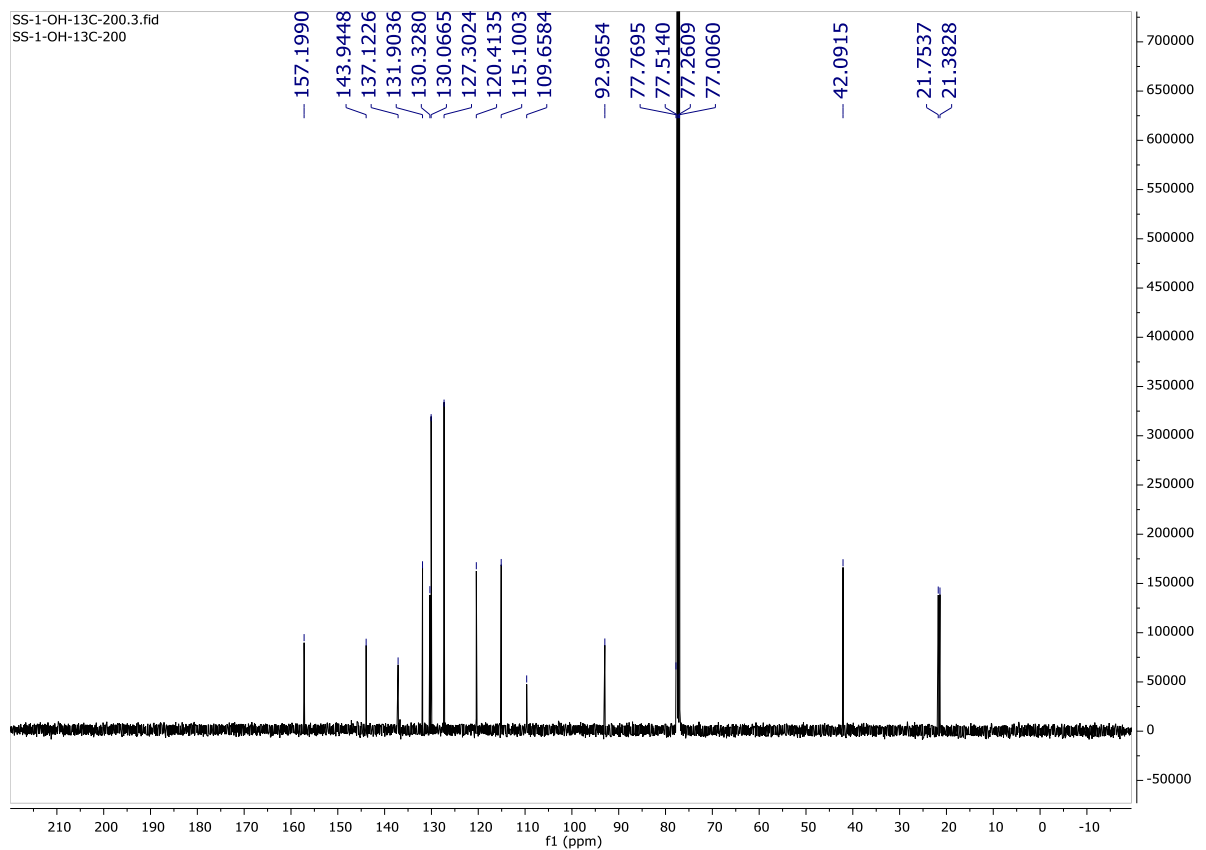

$^1\text{H}$  (400 MHz,  $\text{CDCl}_3$ ) and  $^{13}\text{C}\{^1\text{H}\}$  (125 MHz,  $\text{CDCl}_3$ ) NMR spectra of **Z-3aa**

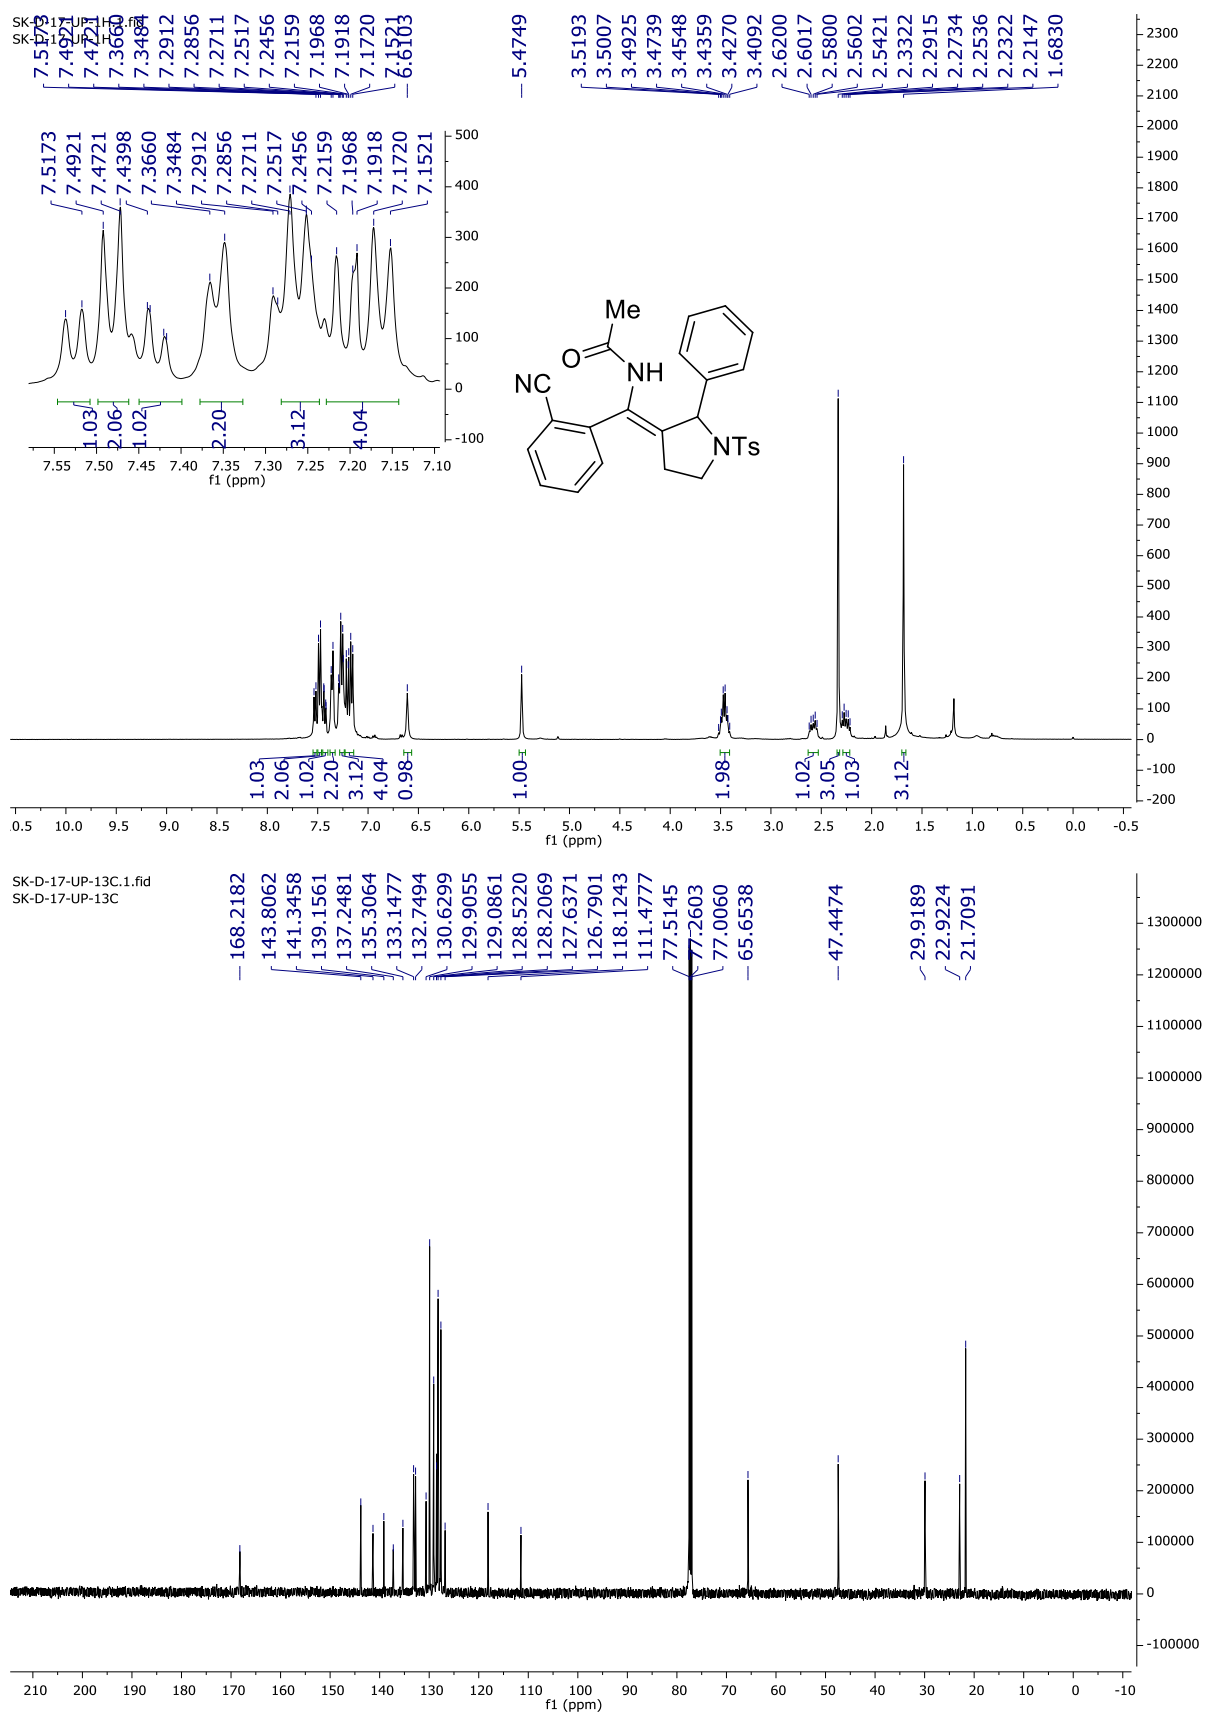

$^1\text{H}$  (400 MHz,  $\text{CDCl}_3$ ) and  $^{13}\text{C}\{^1\text{H}\}$  (125 MHz,  $\text{CDCl}_3$ ) NMR spectra of *E*-3aa

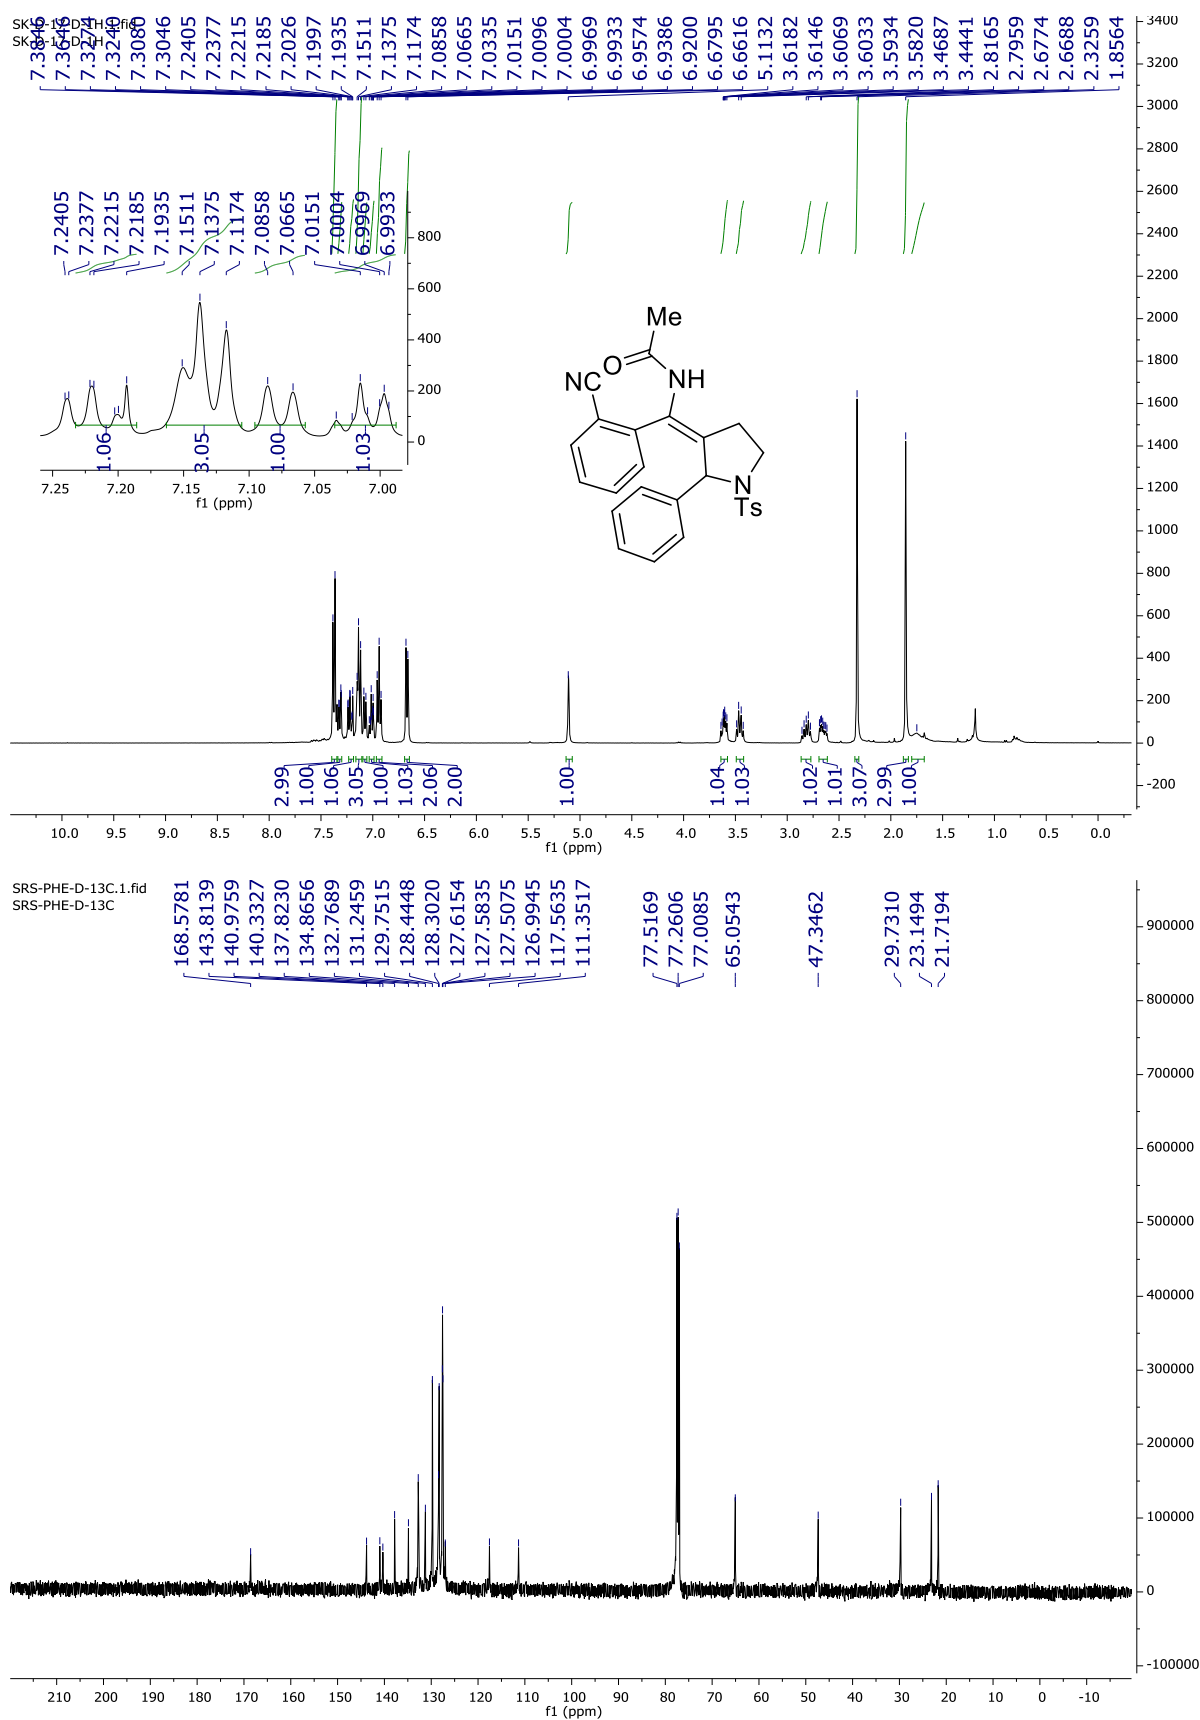

$^1\text{H}$  (500 MHz,  $\text{CDCl}_3$ ) and  $^{13}\text{C}\{^1\text{H}\}$  (125 MHz,  $\text{CDCl}_3$ ) NMR spectra of **Z-3ac**

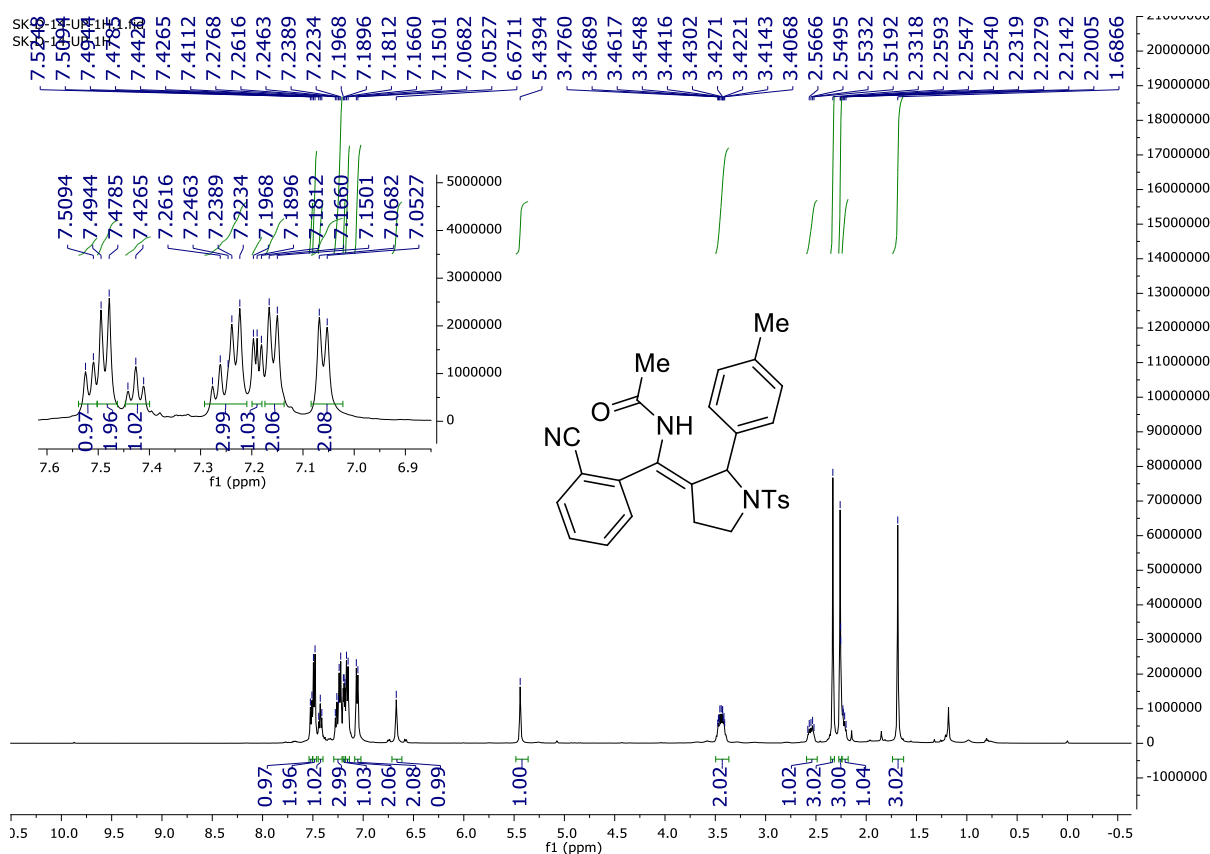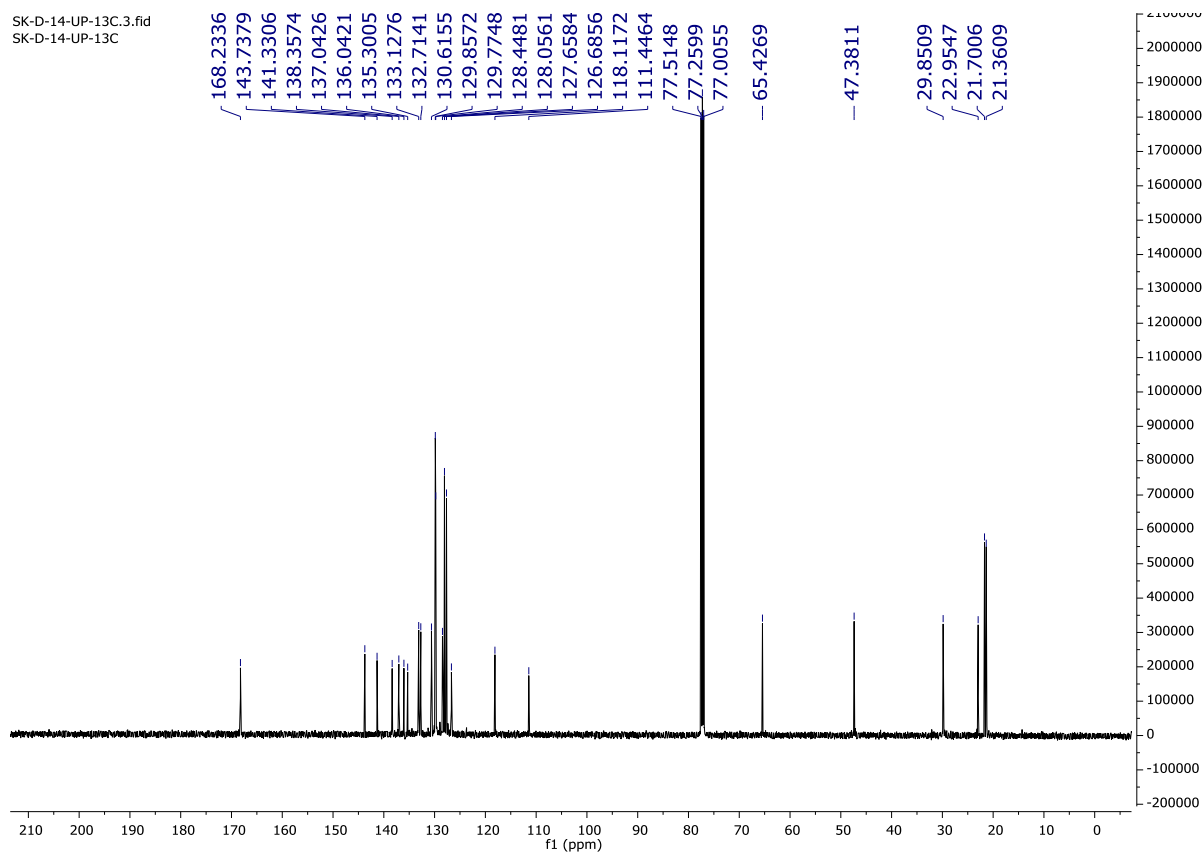

$^1\text{H}$  (400 MHz,  $\text{CDCl}_3$ ) and  $^{13}\text{C}\{^1\text{H}\}$  (125 MHz,  $\text{CDCl}_3$ ) NMR spectra of *E*-3ac

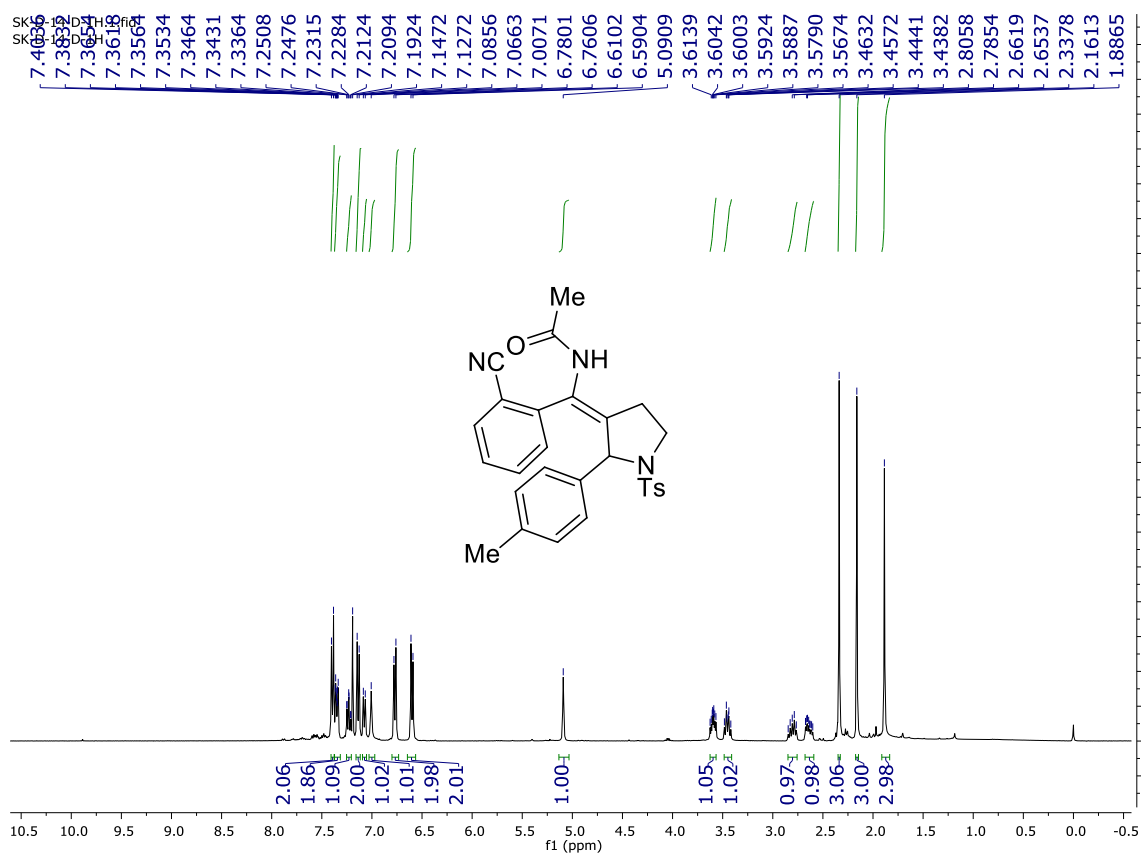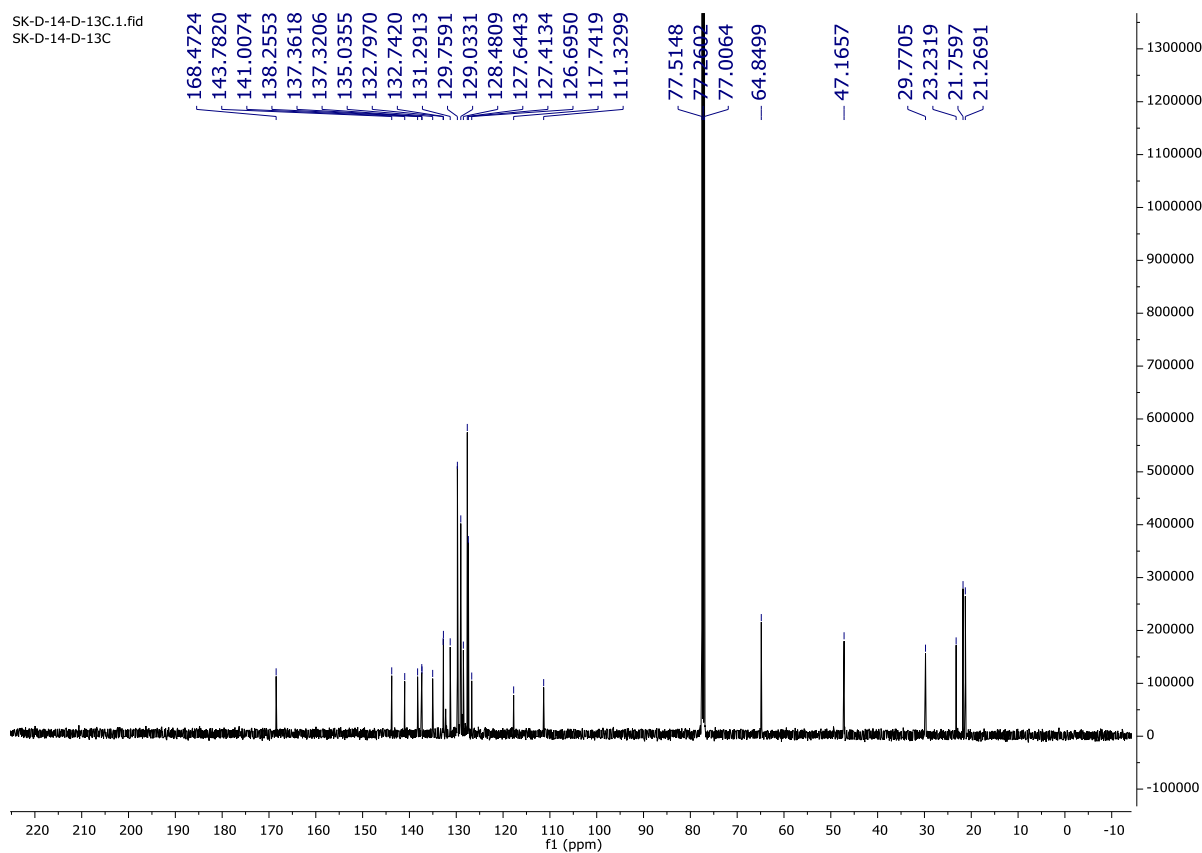

$^1\text{H}$  (400 MHz,  $\text{CDCl}_3$ ) and  $^{13}\text{C}\{^1\text{H}\}$  (125 MHz,  $\text{CDCl}_3$ ) NMR spectra of **Z-3ad**

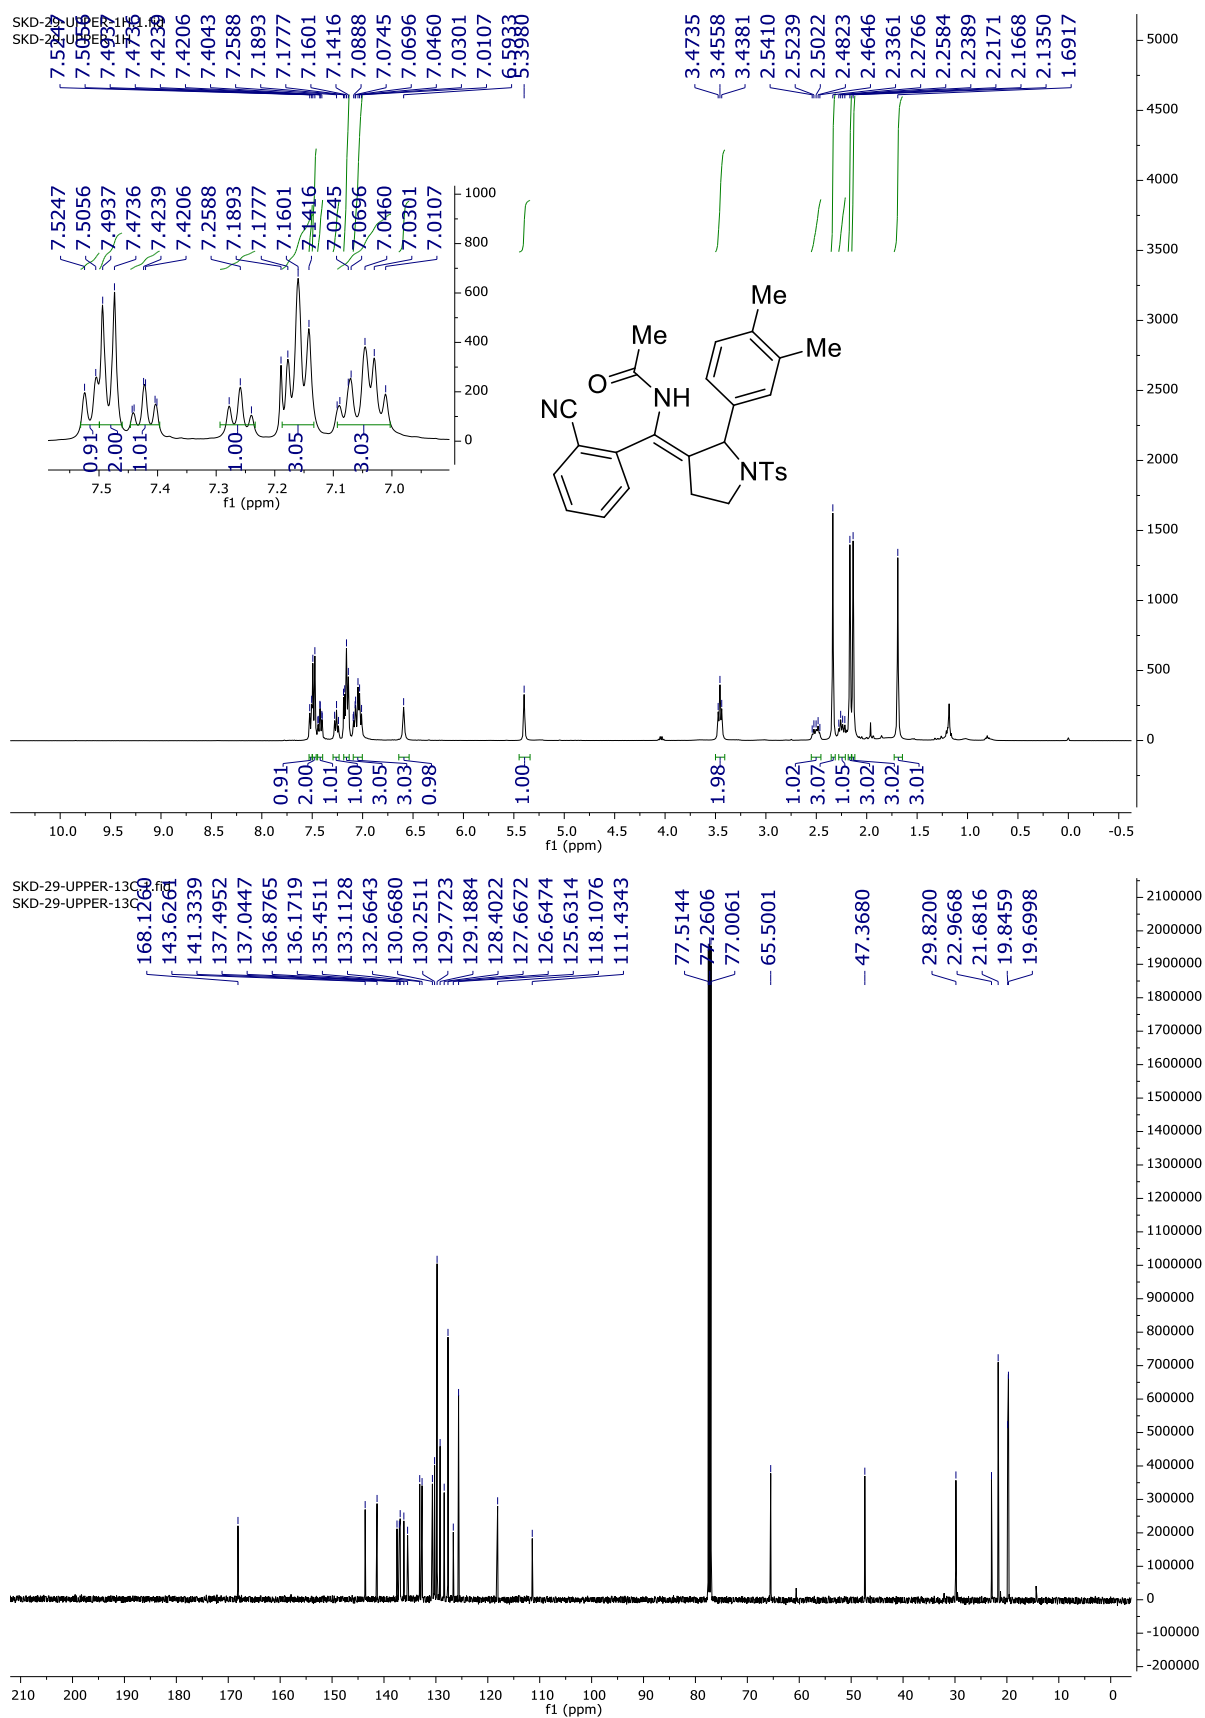

$^1\text{H}$  (400 MHz,  $\text{CDCl}_3$ ) and  $^{13}\text{C}\{^1\text{H}\}$  (125 MHz,  $\text{CDCl}_3$ ) NMR spectra of *E*-3ad

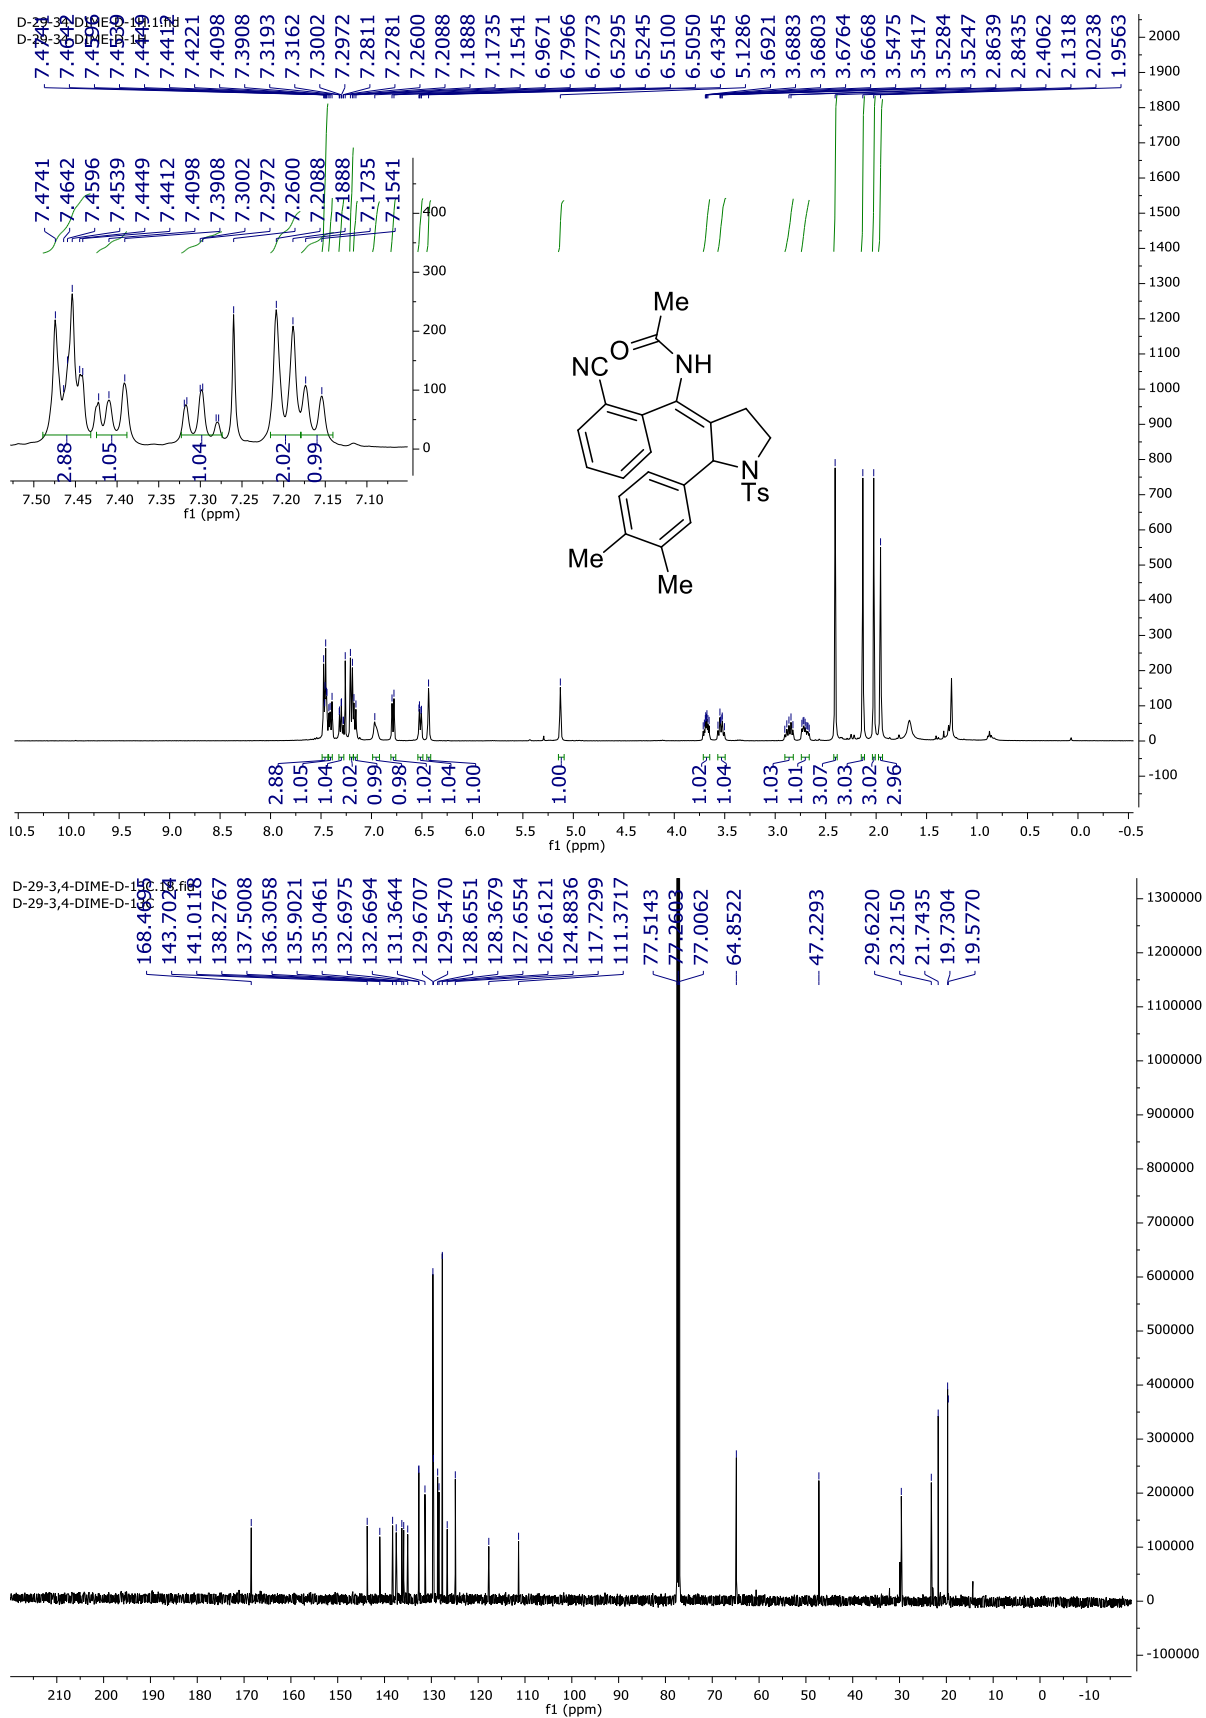





$^1\text{H}$  (400 MHz,  $\text{CDCl}_3$ ) and  $^{13}\text{C}\{^1\text{H}\}$  (125 MHz,  $\text{CDCl}_3$ ) NMR spectra of *E*-3ae

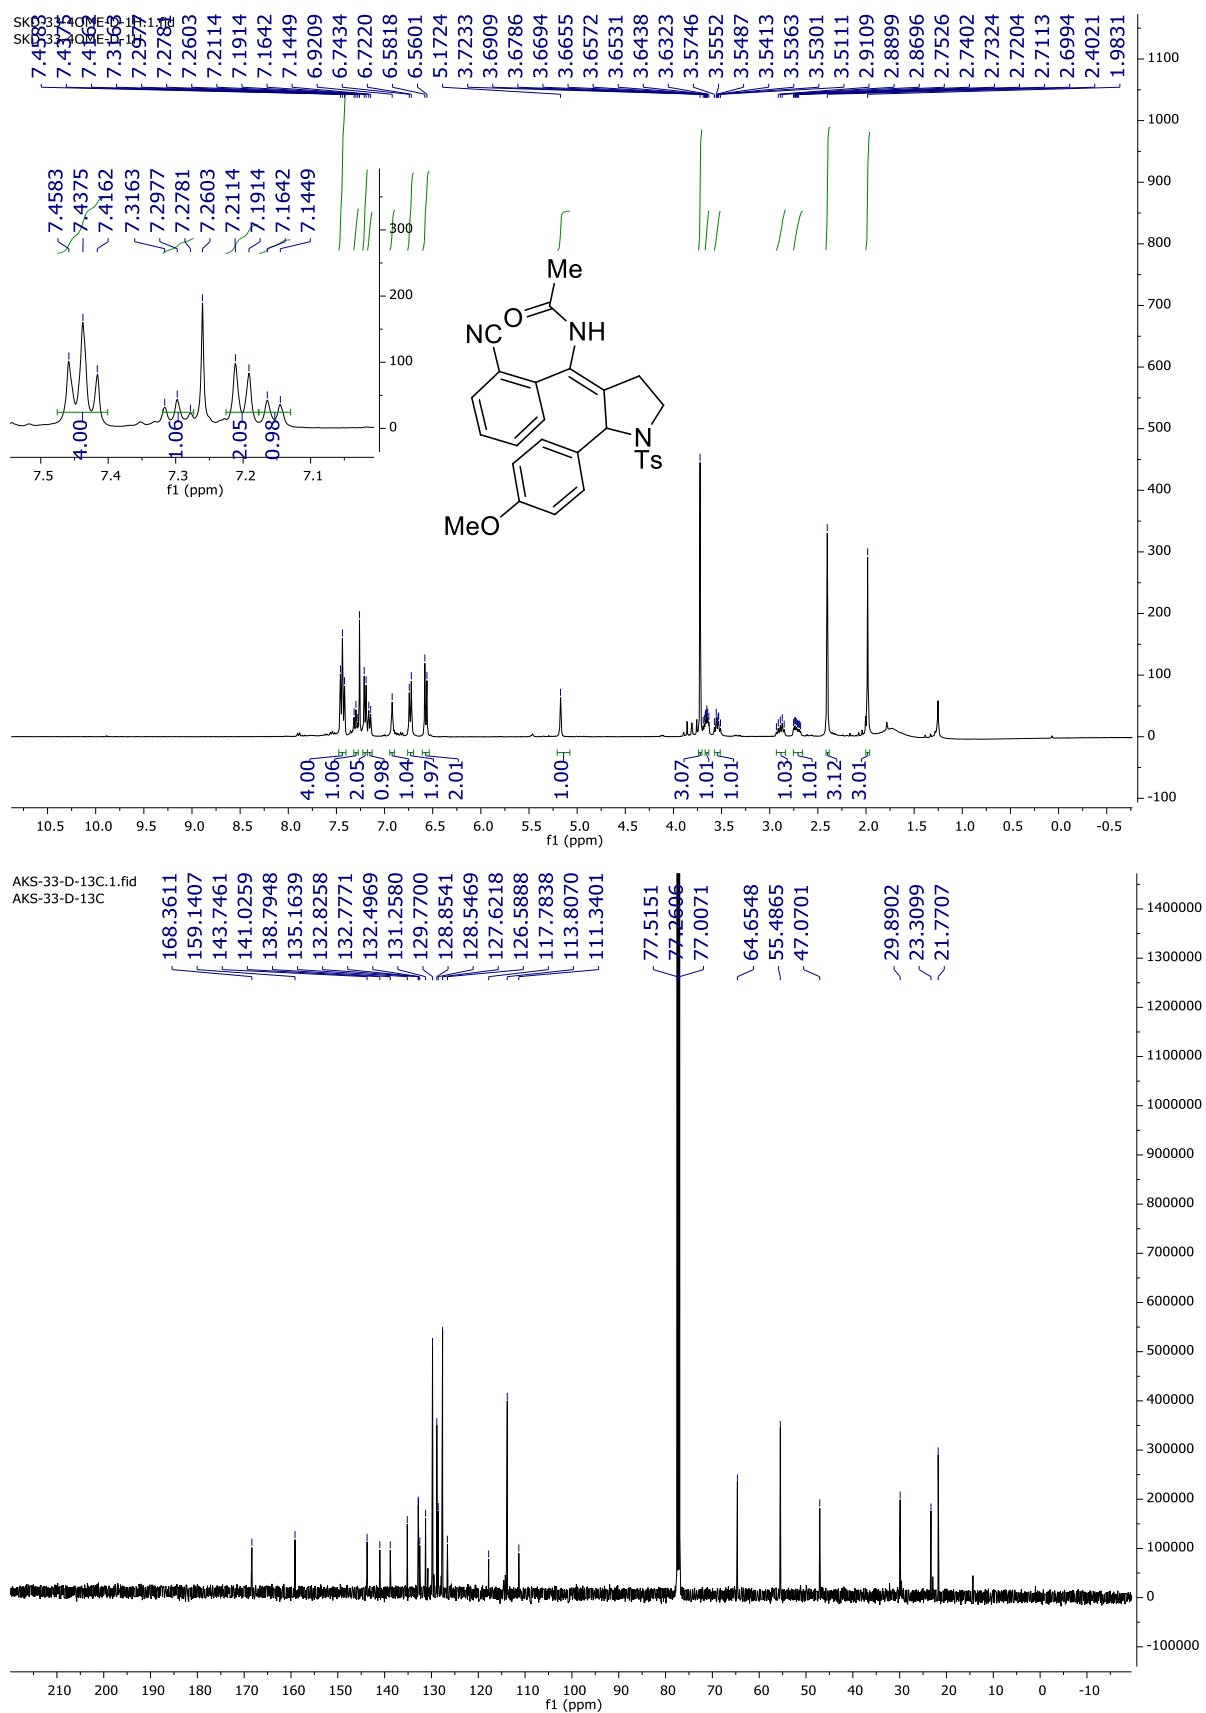

$^1\text{H}$  (400 MHz,  $\text{CDCl}_3$ ) and  $^{13}\text{C}\{^1\text{H}\}$  (125 MHz,  $\text{CDCl}_3$ ) NMR spectra of **Z-3af**

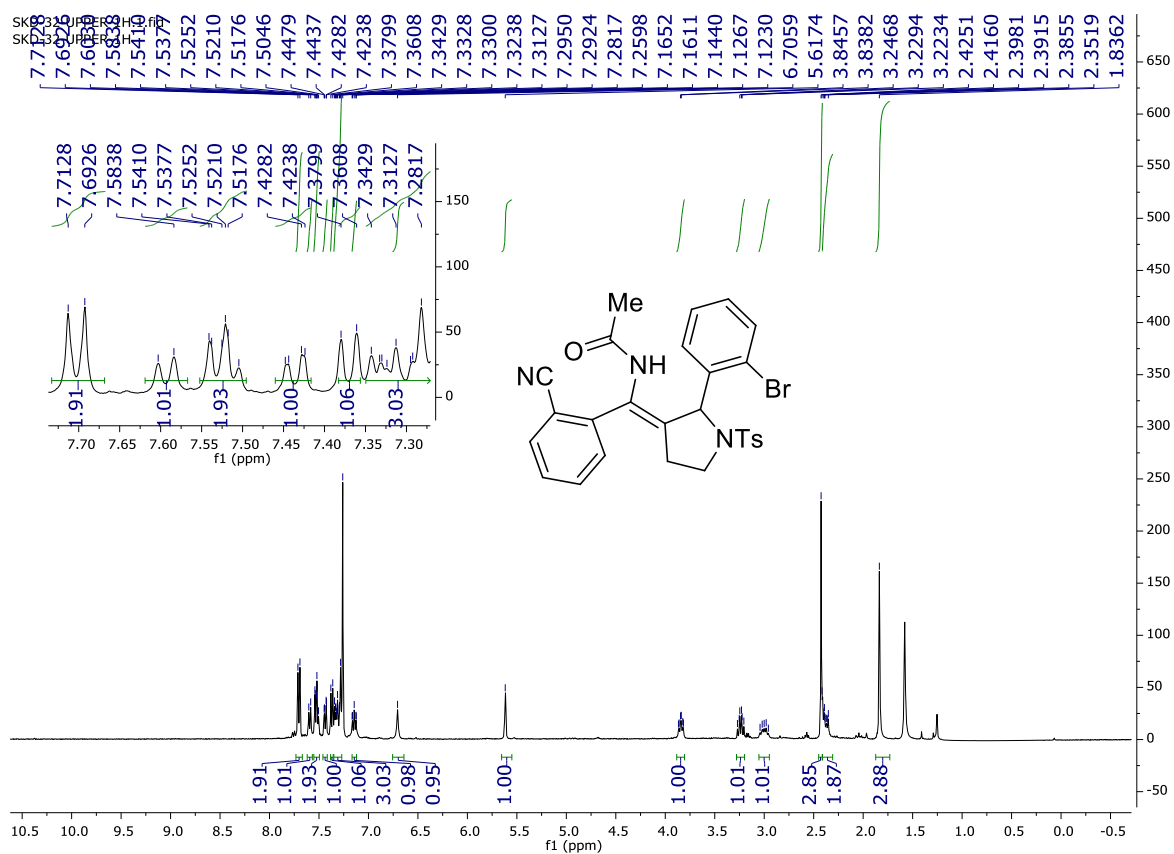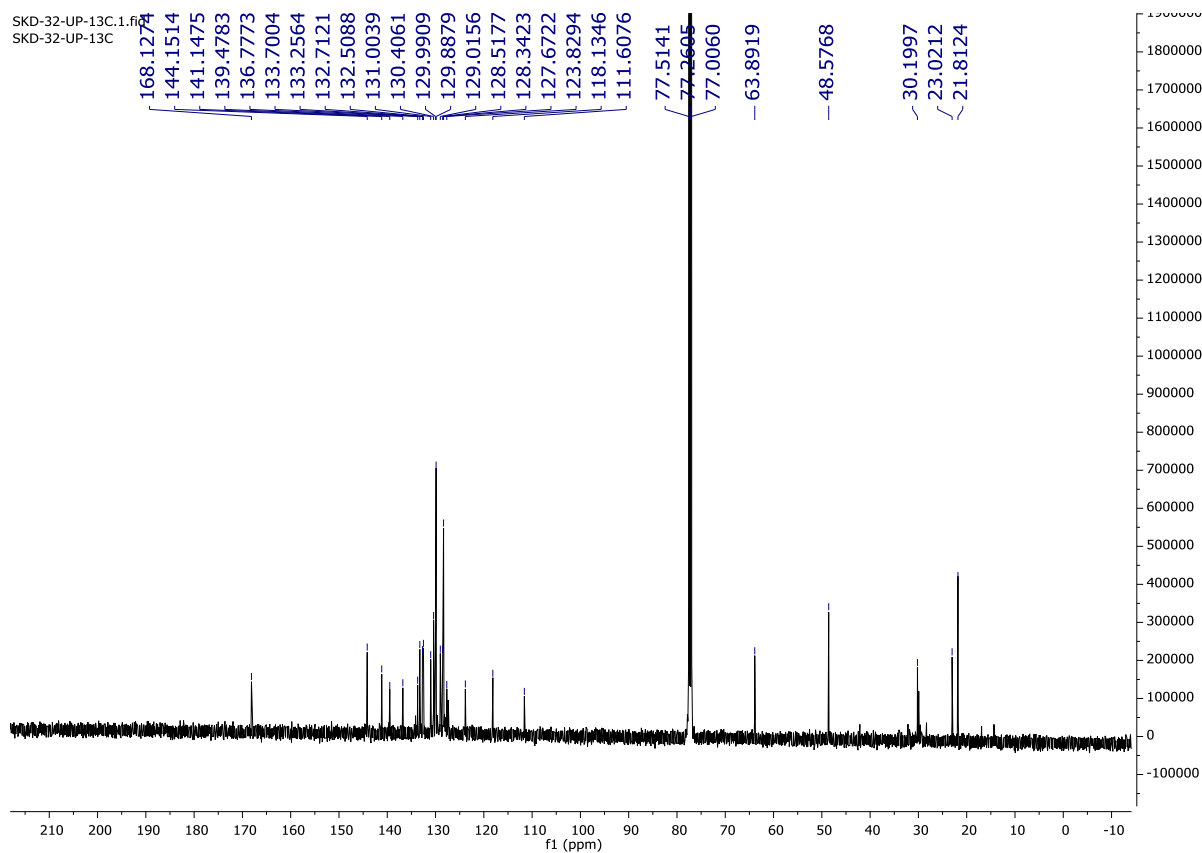

$^1\text{H}$  (400 MHz,  $\text{CDCl}_3$ ) and  $^{13}\text{C}\{^1\text{H}\}$  (125 MHz,  $\text{CDCl}_3$ ) NMR spectra of *E*-3af

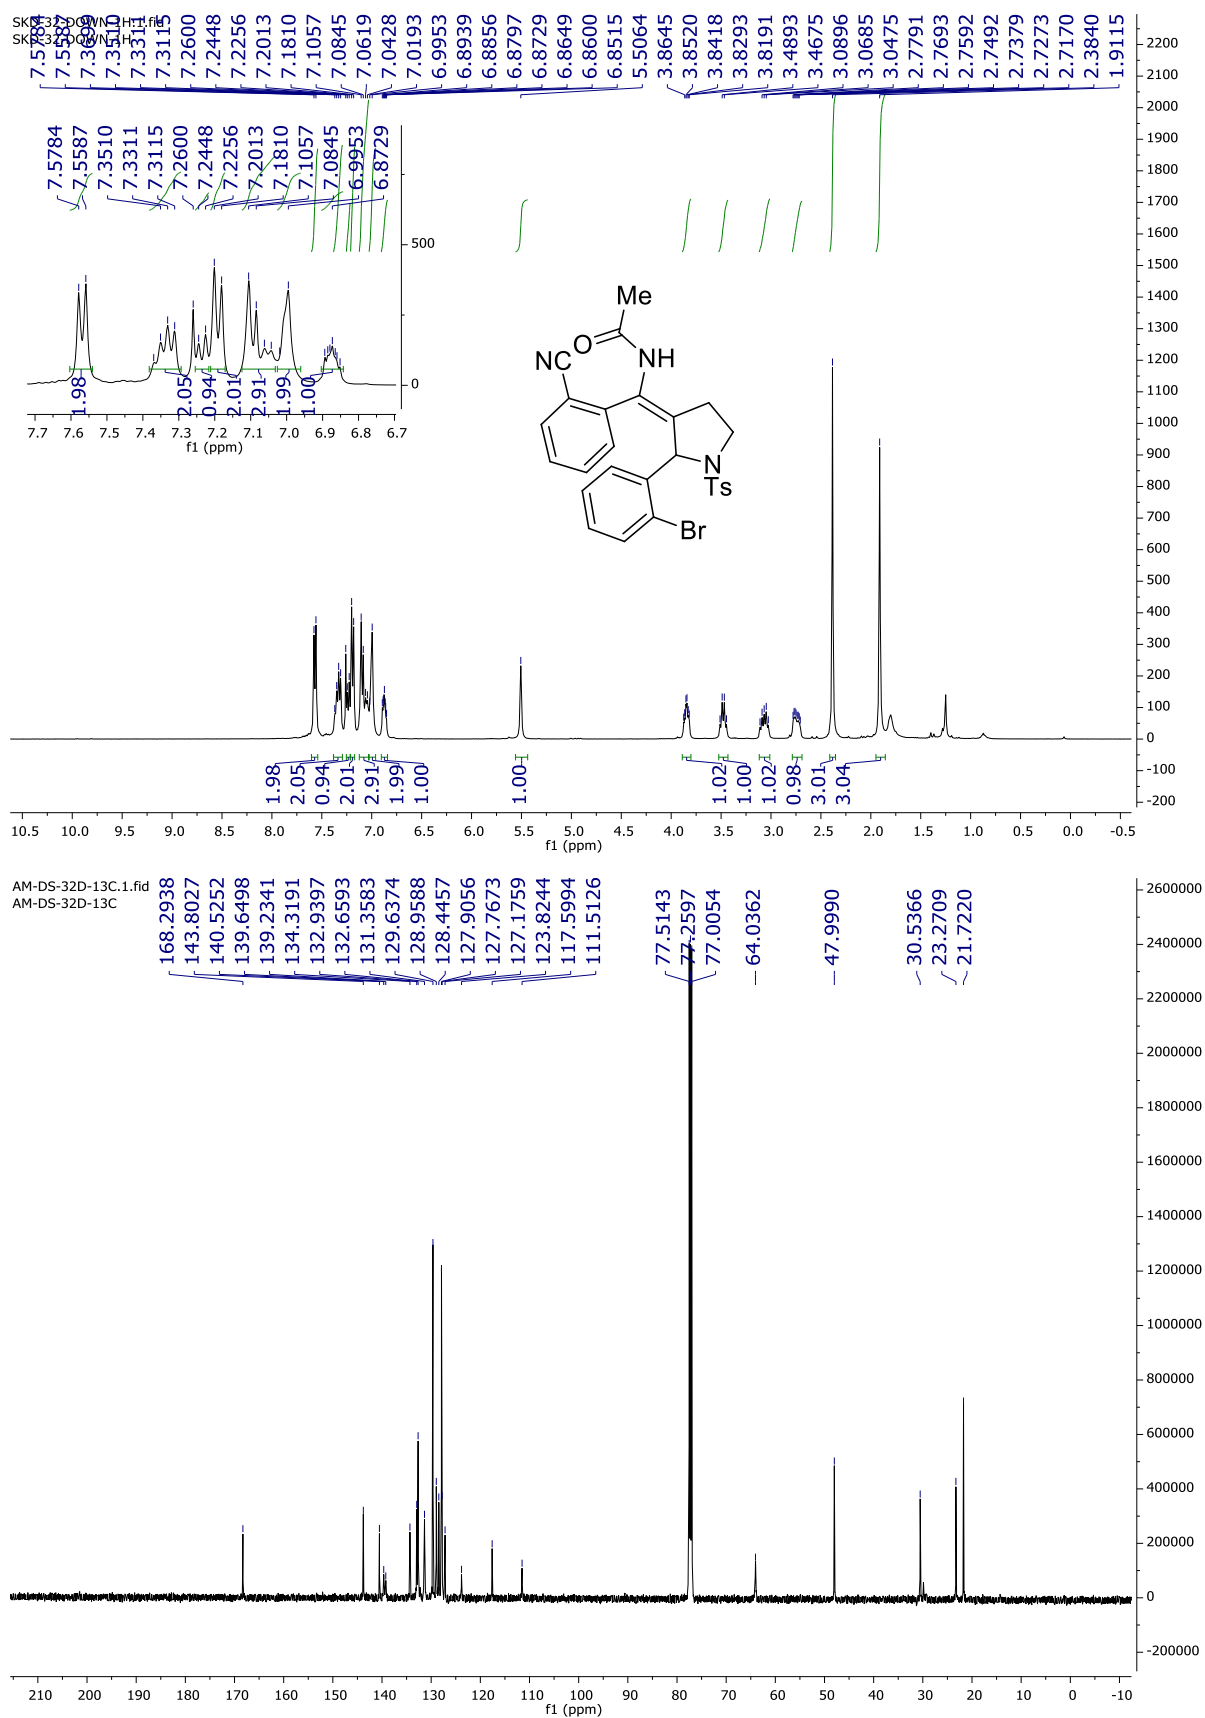

$^1\text{H}$  (400 MHz,  $\text{CDCl}_3$ ) and  $^{13}\text{C}\{^1\text{H}\}$  (150 MHz,  $\text{CDCl}_3$ ) NMR spectra of **Z-3ag**

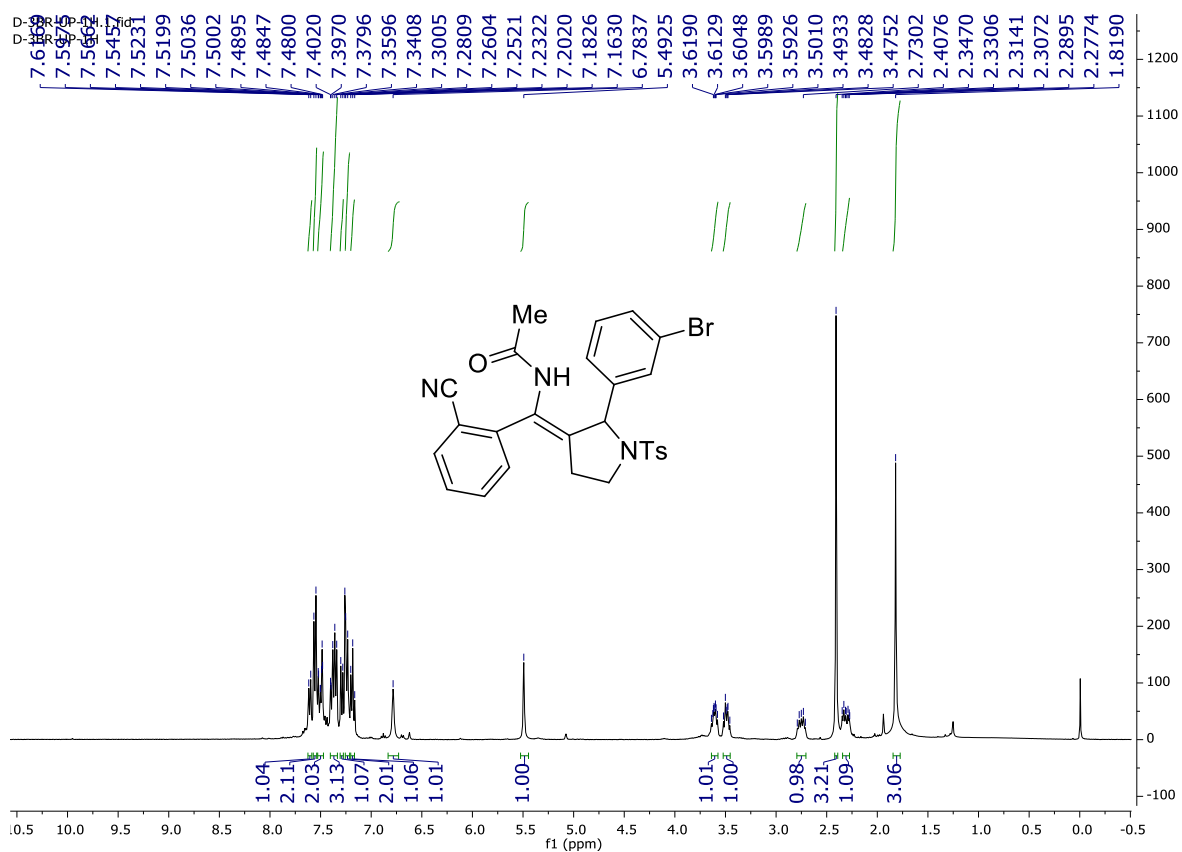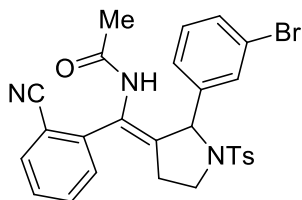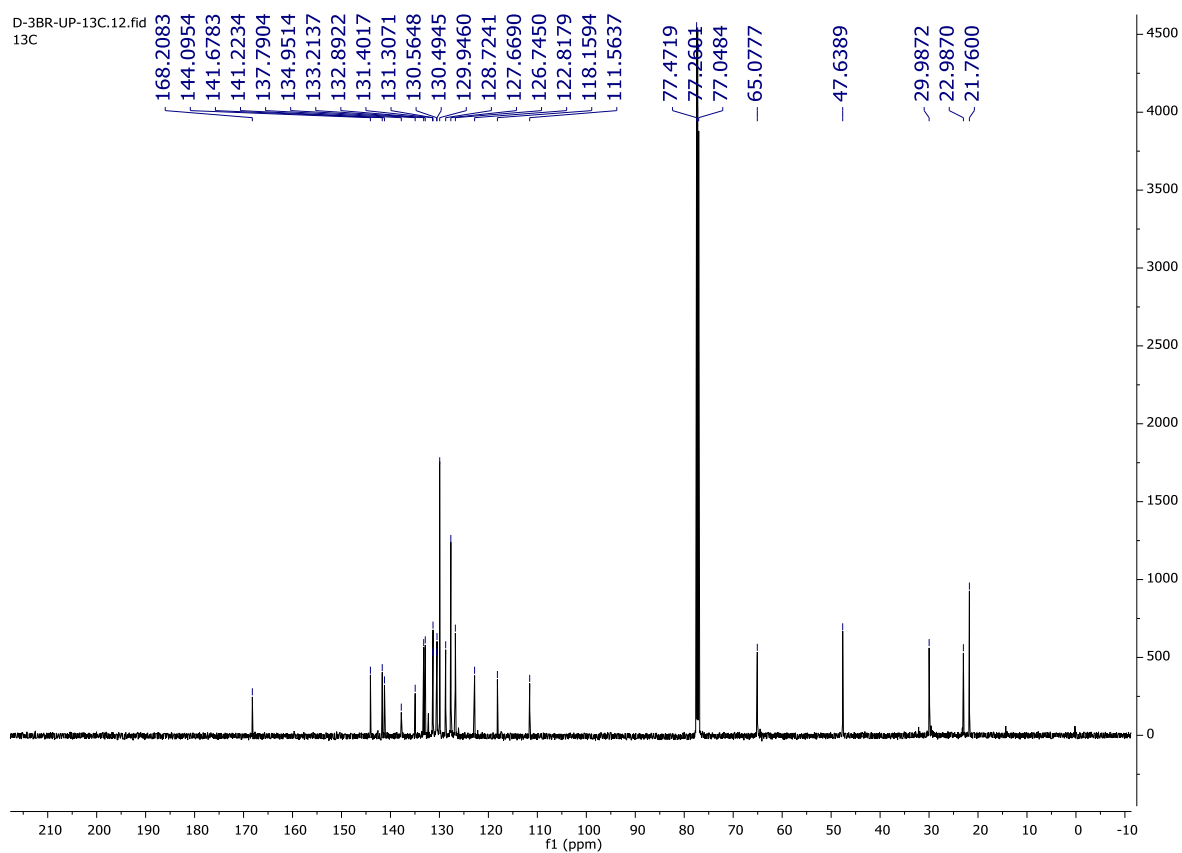

$^1\text{H}$  (400 MHz,  $\text{CDCl}_3$ ) and  $^{13}\text{C}\{^1\text{H}\}$  (125 MHz,  $\text{CDCl}_3$ ) NMR spectra of *E*-3ag

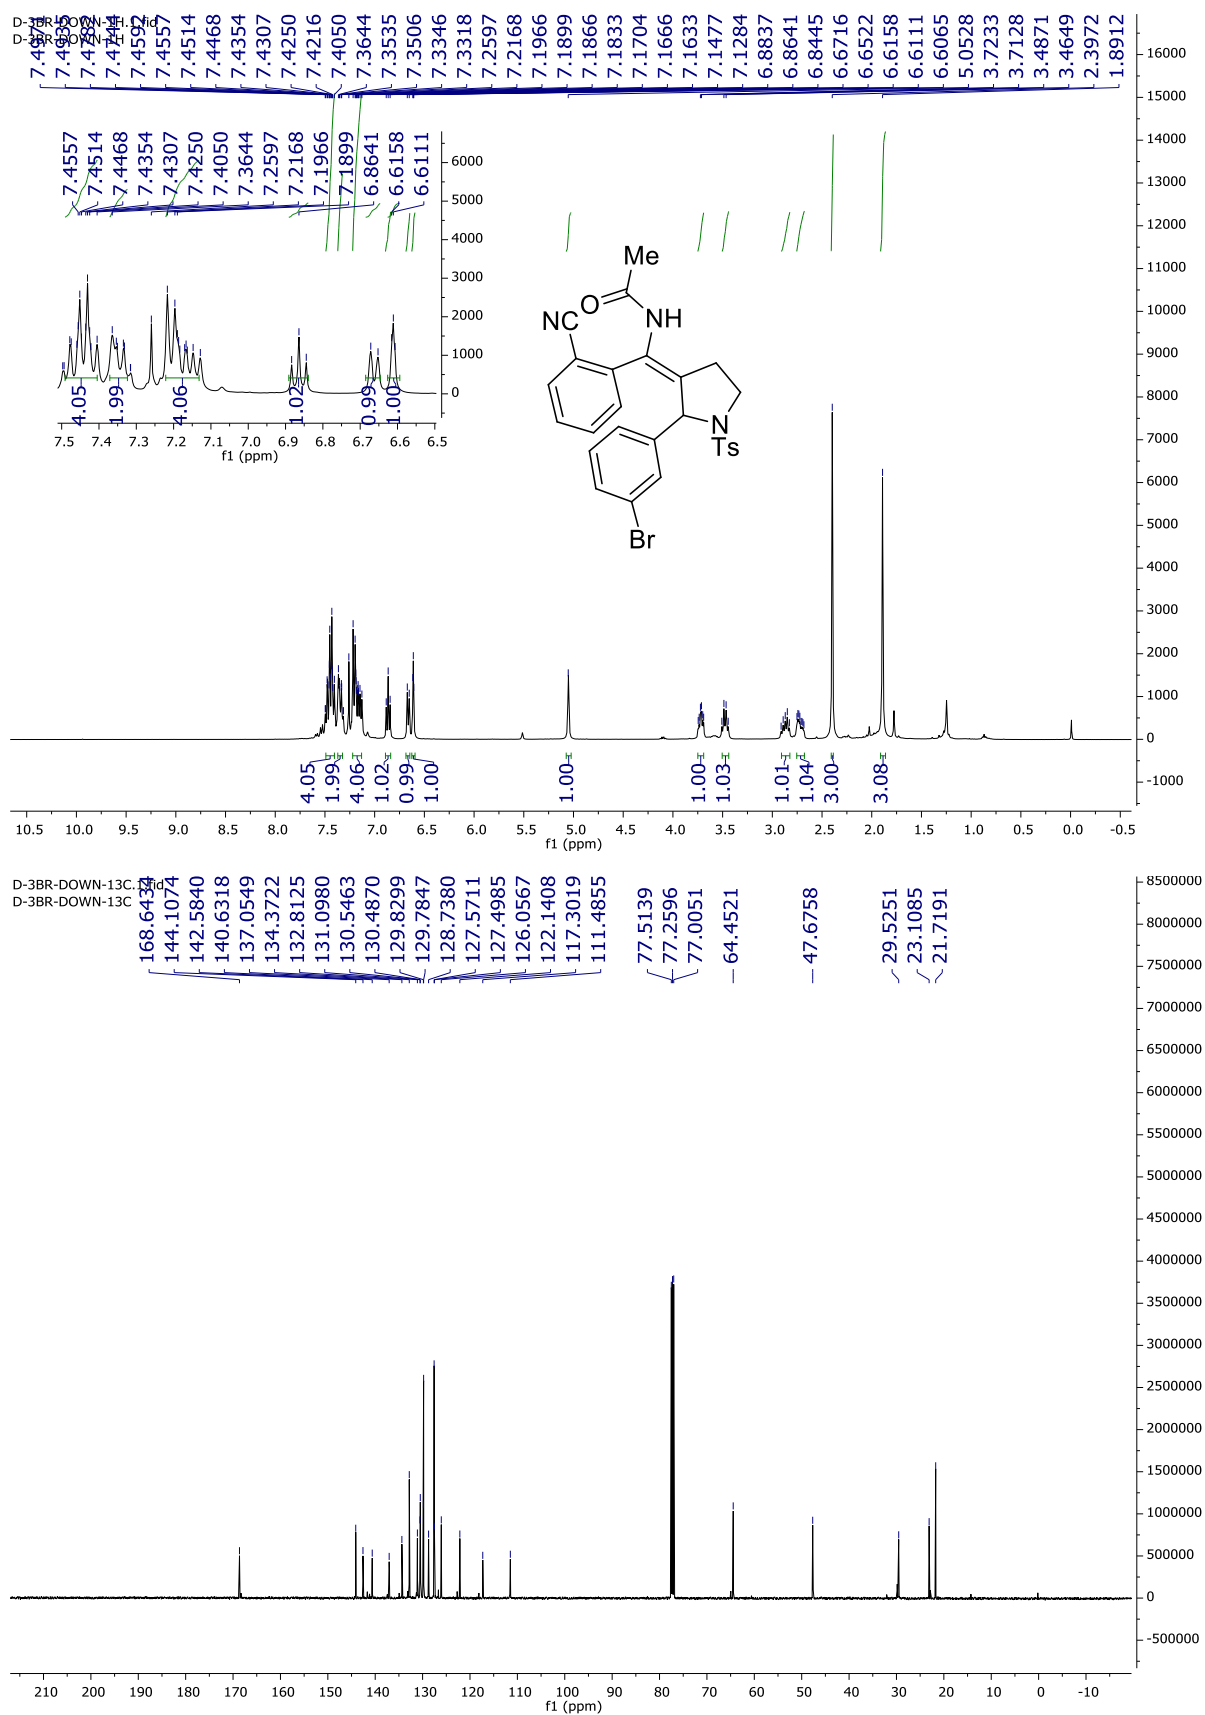

$^1\text{H}$  (400 MHz,  $\text{CDCl}_3$ ) and  $^{13}\text{C}\{^1\text{H}\}$  (150 MHz,  $\text{CDCl}_3$ ) NMR spectra of **Z-3ah**

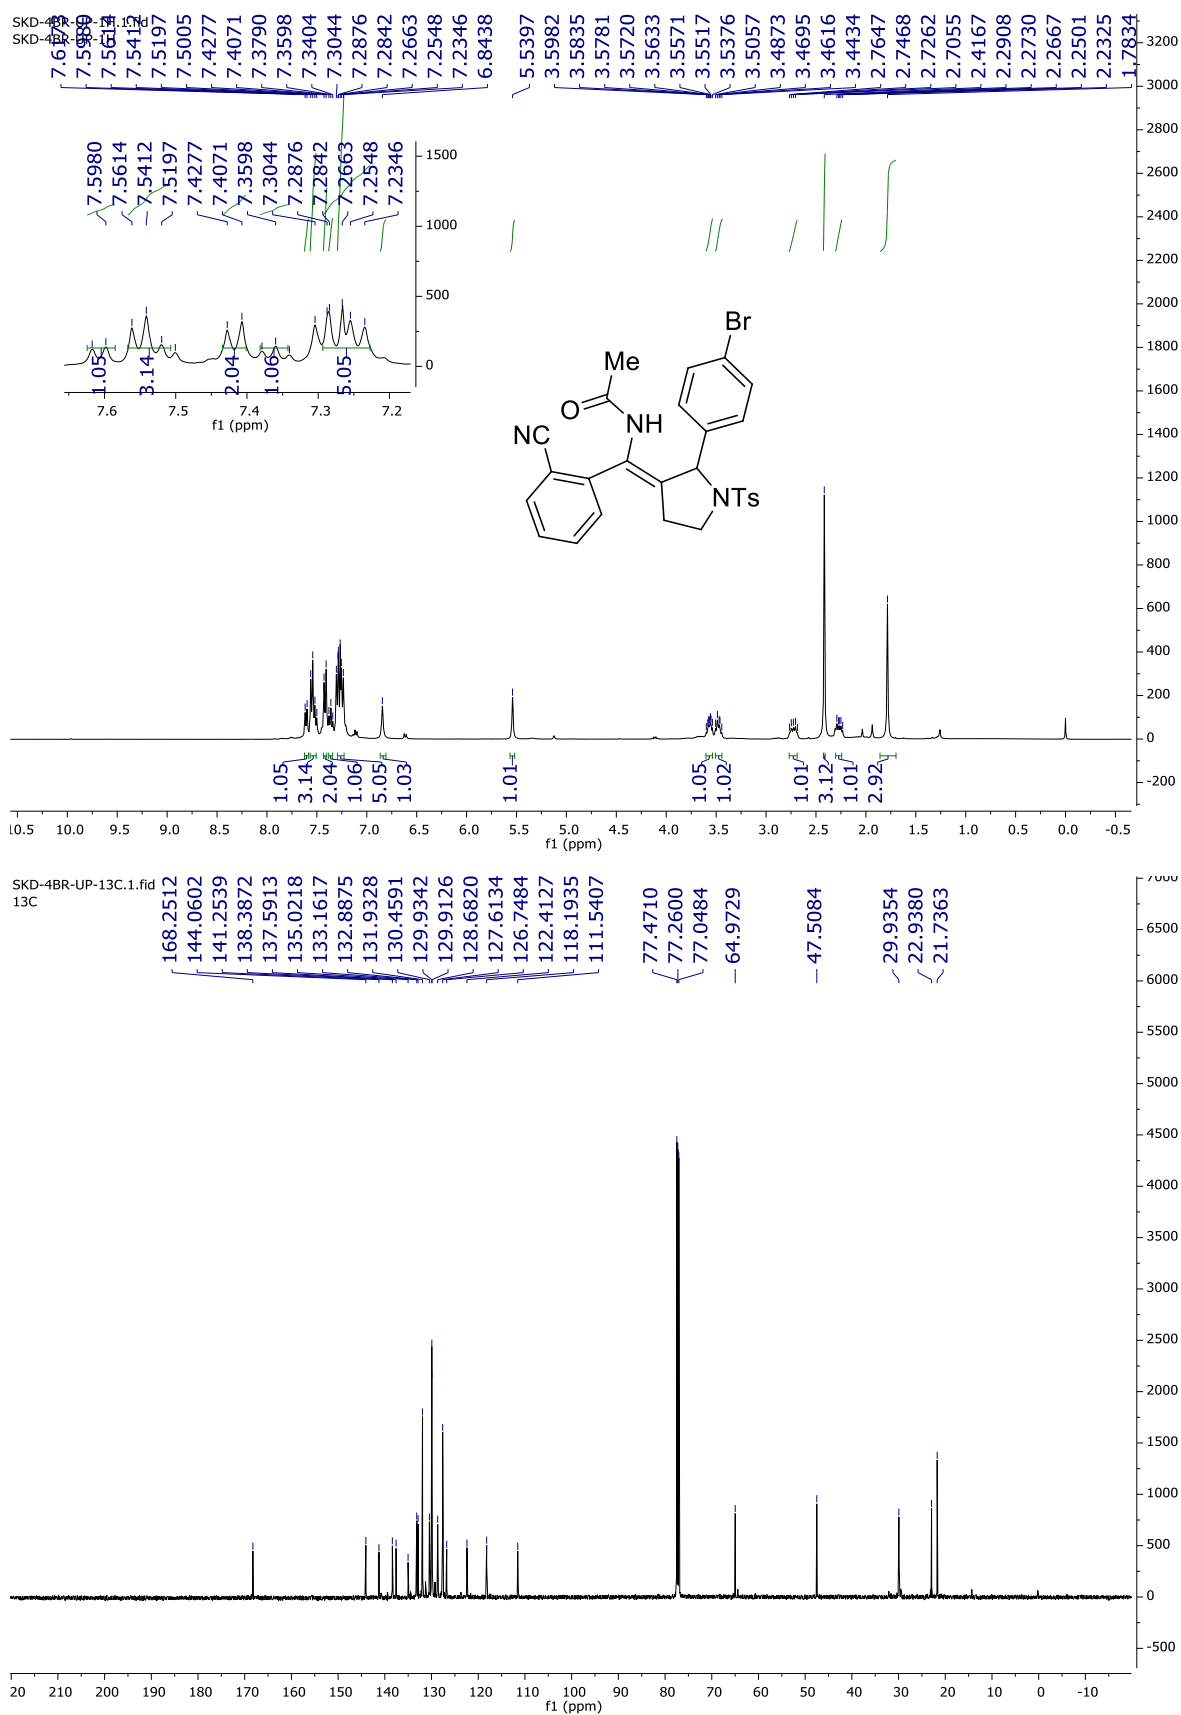

$^1\text{H}$  (400 MHz,  $\text{CDCl}_3$ ) and  $^{13}\text{C}\{^1\text{H}\}$  (150 MHz,  $\text{CDCl}_3$ ) NMR spectra of *E*-3ah

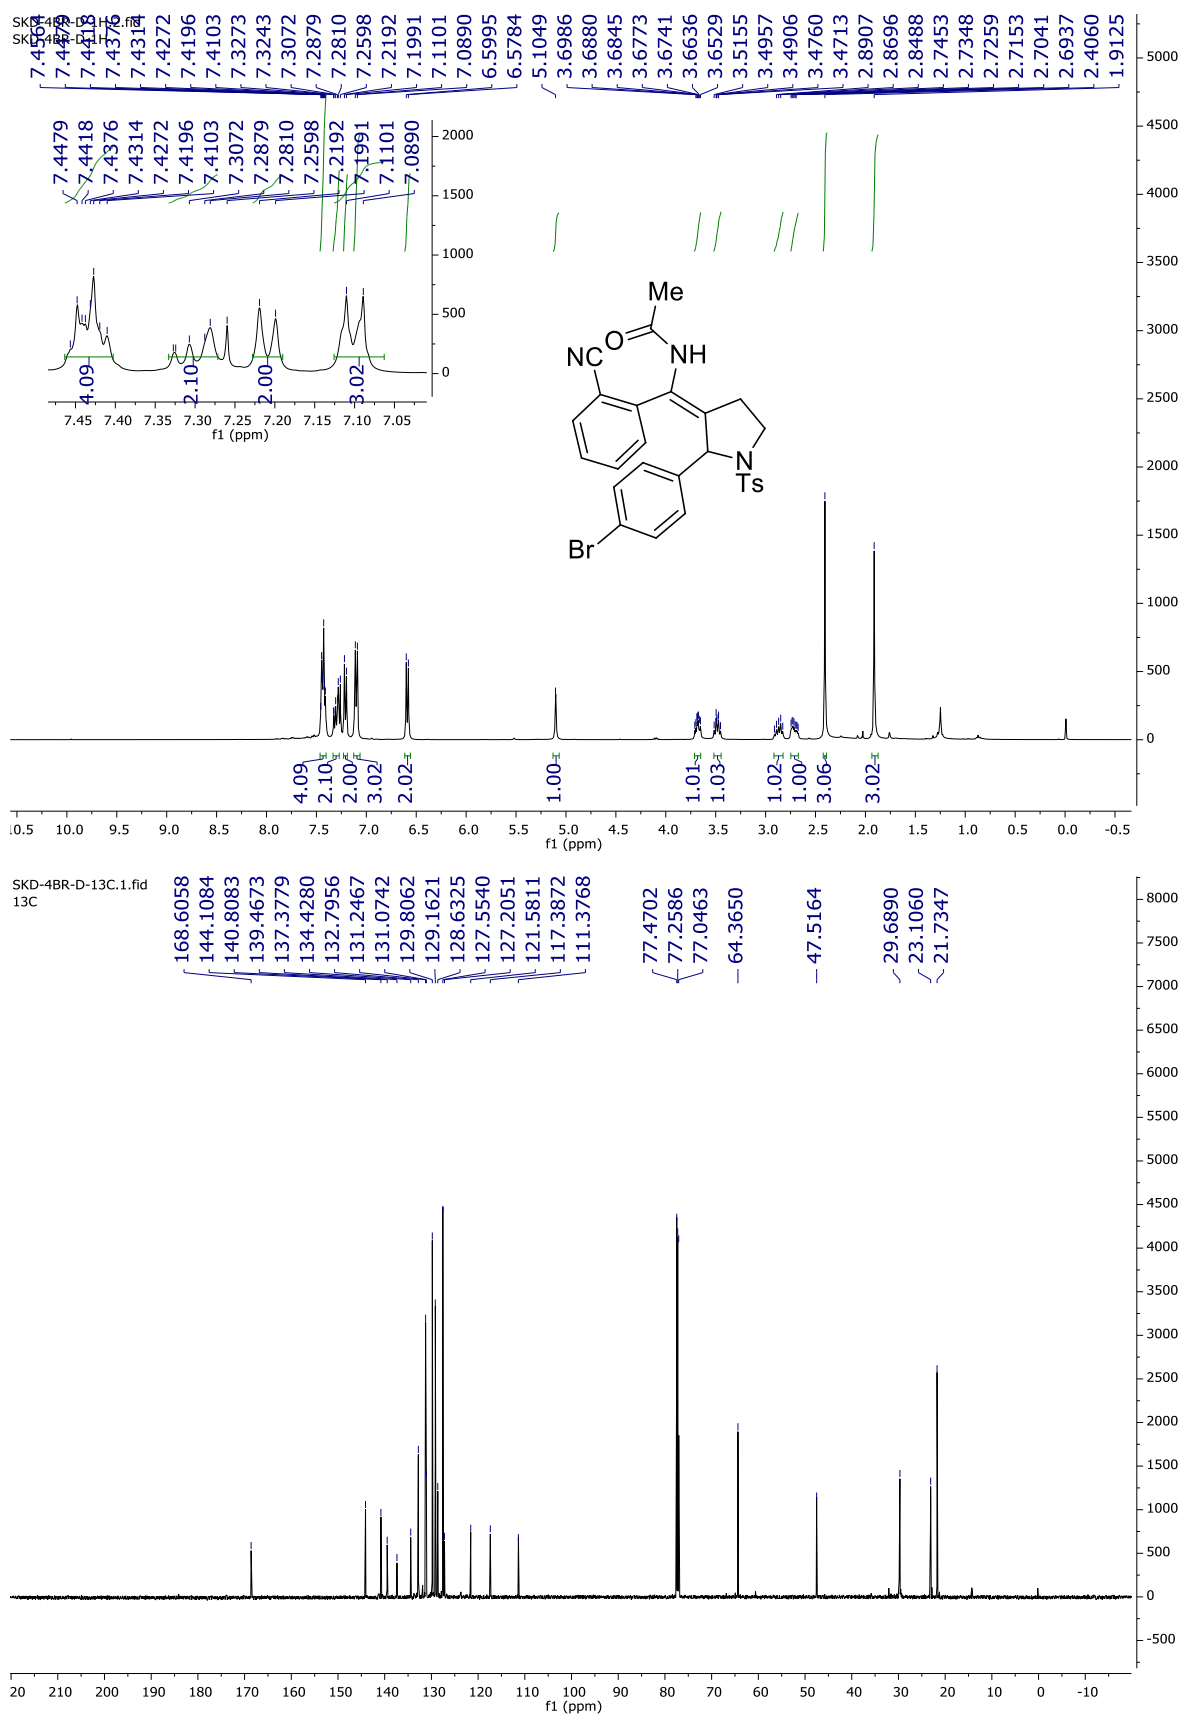

$^1\text{H}$  (400 MHz,  $\text{CDCl}_3$ ) and  $^{13}\text{C}\{^1\text{H}\}$  (150 MHz,  $\text{CDCl}_3$ ) NMR spectra of **Z-3ai**

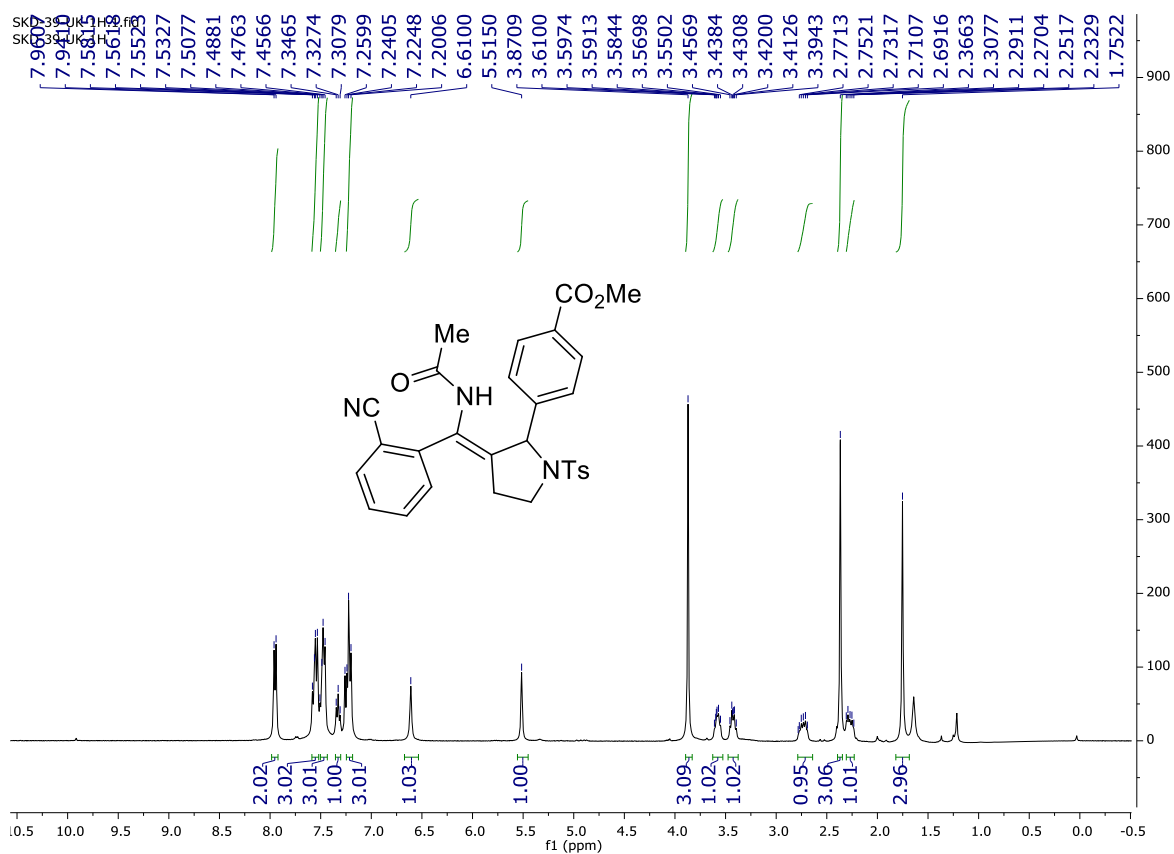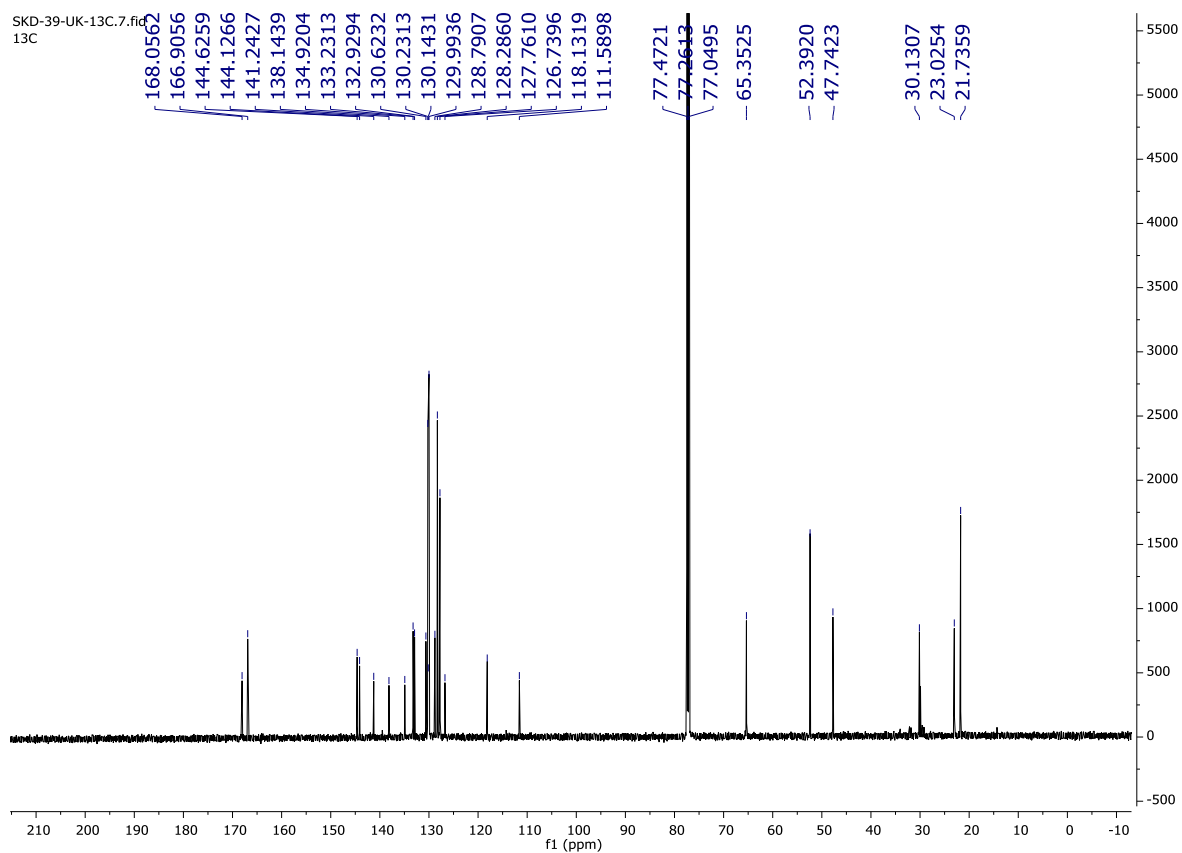



$^1\text{H}$  (400 MHz,  $\text{CDCl}_3$ ) and  $^{13}\text{C}\{^1\text{H}\}$  (125 MHz,  $\text{CDCl}_3$ ) NMR spectra of *E*-3ai

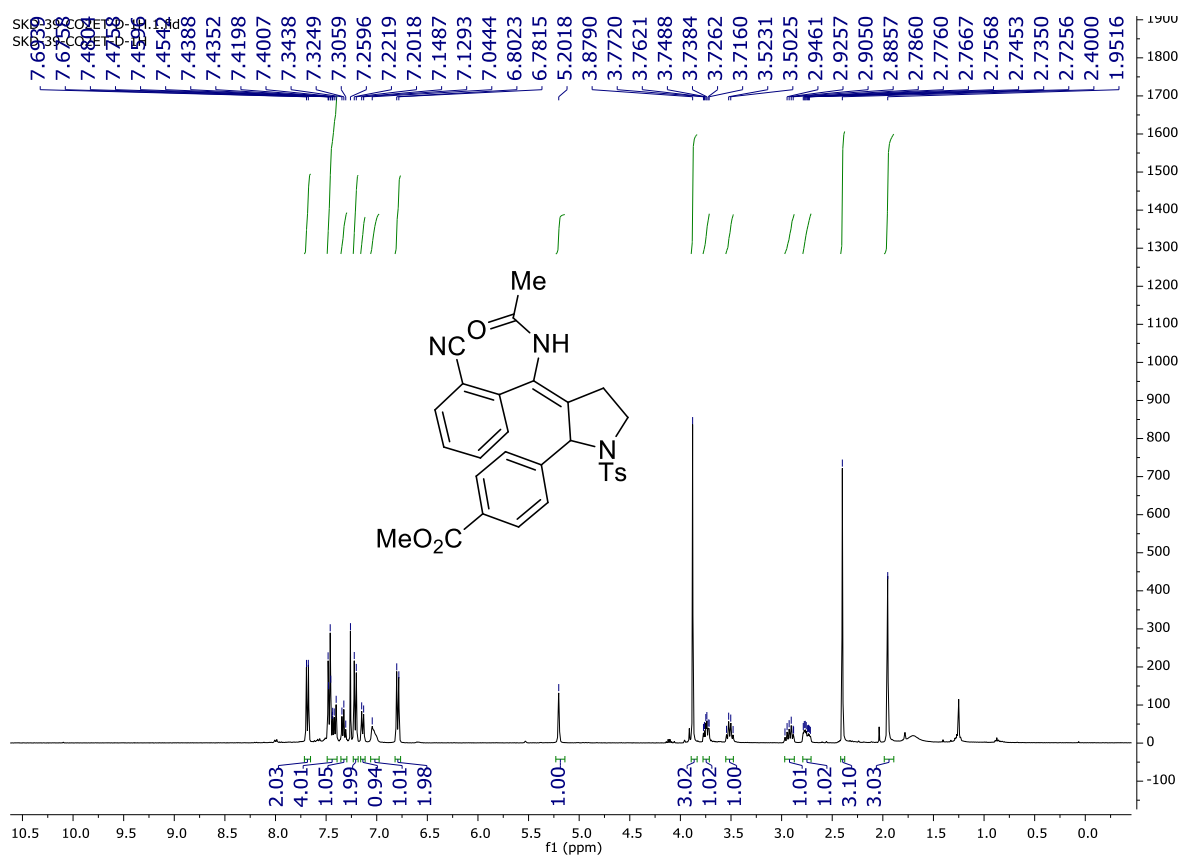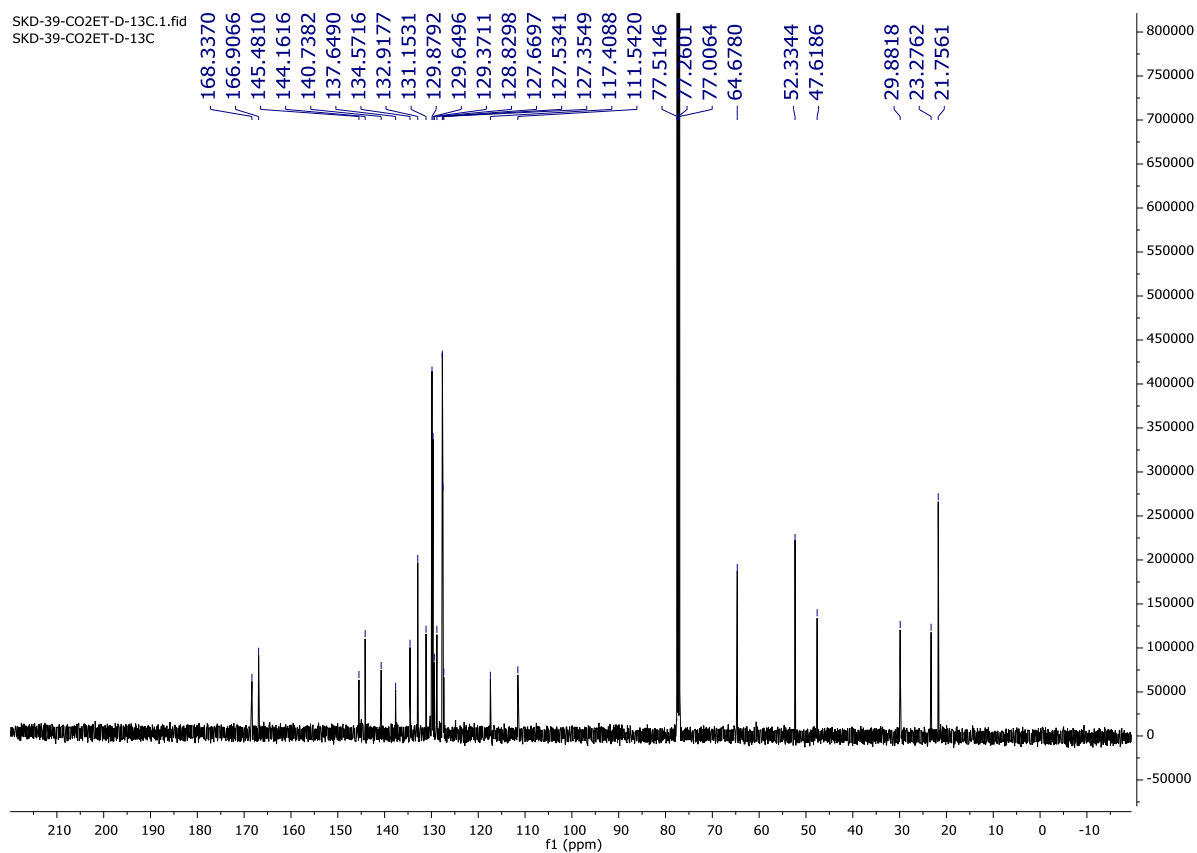

$^1\text{H}$  (400 MHz,  $\text{CDCl}_3$ ) and  $^{13}\text{C}\{^1\text{H}\}$  (125 MHz,  $\text{CDCl}_3$ ) NMR spectra of **Z-3aj**

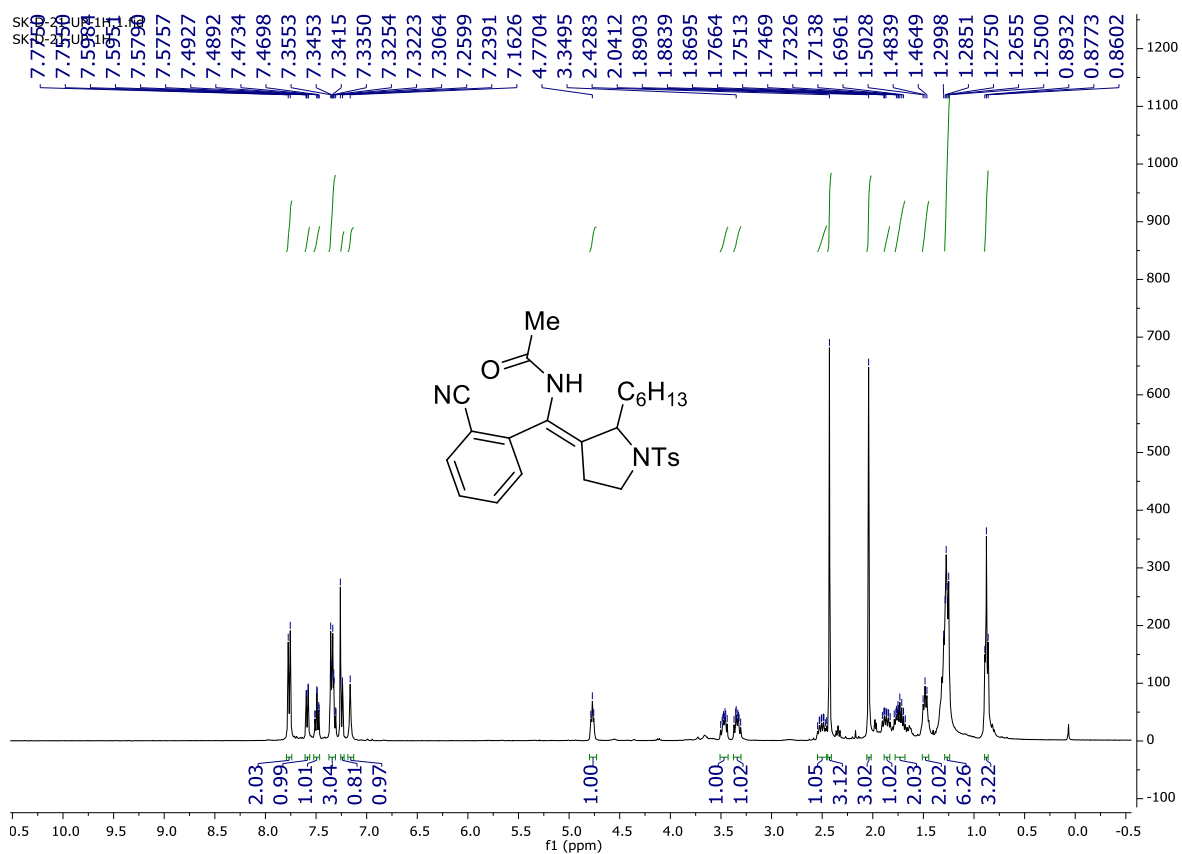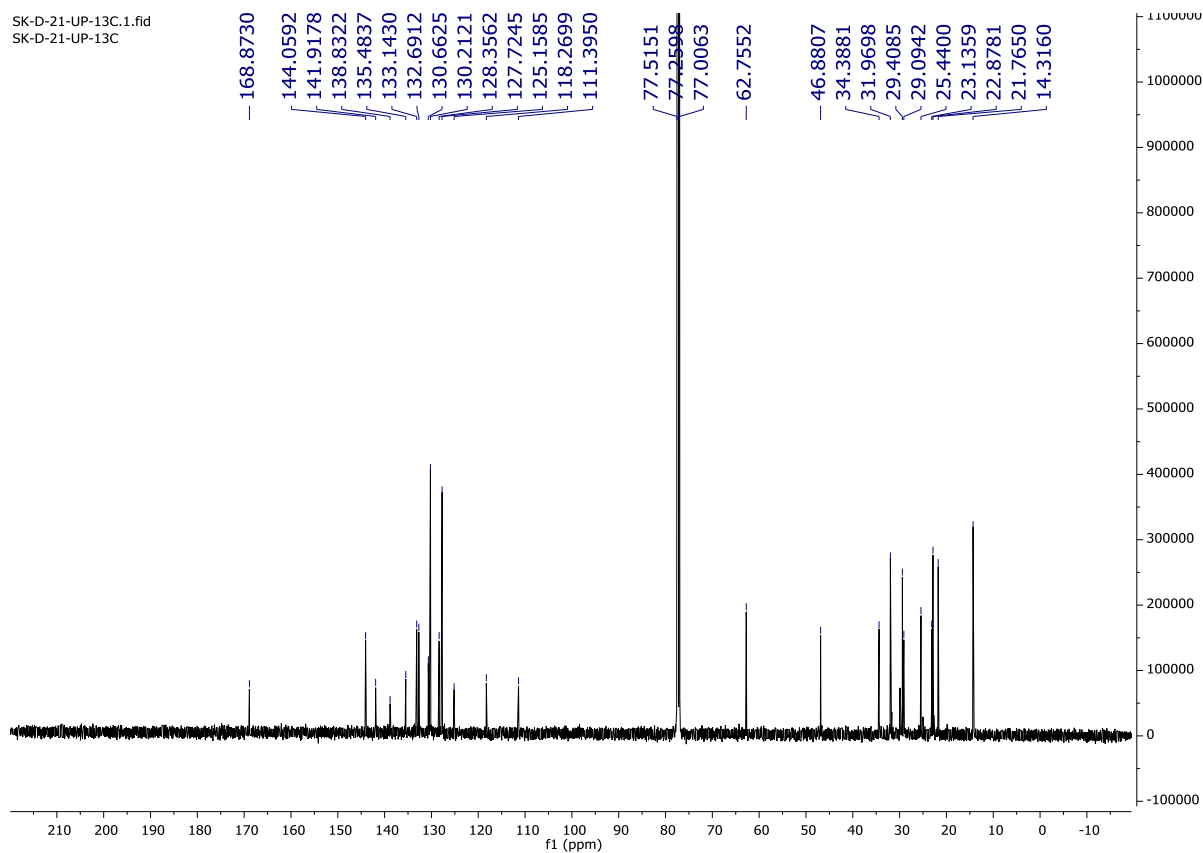

$^1\text{H}$  (400 MHz,  $\text{CDCl}_3$ ) and  $^{13}\text{C}\{^1\text{H}\}$  (125 MHz,  $\text{CDCl}_3$ ) NMR spectra of *E*-3aj

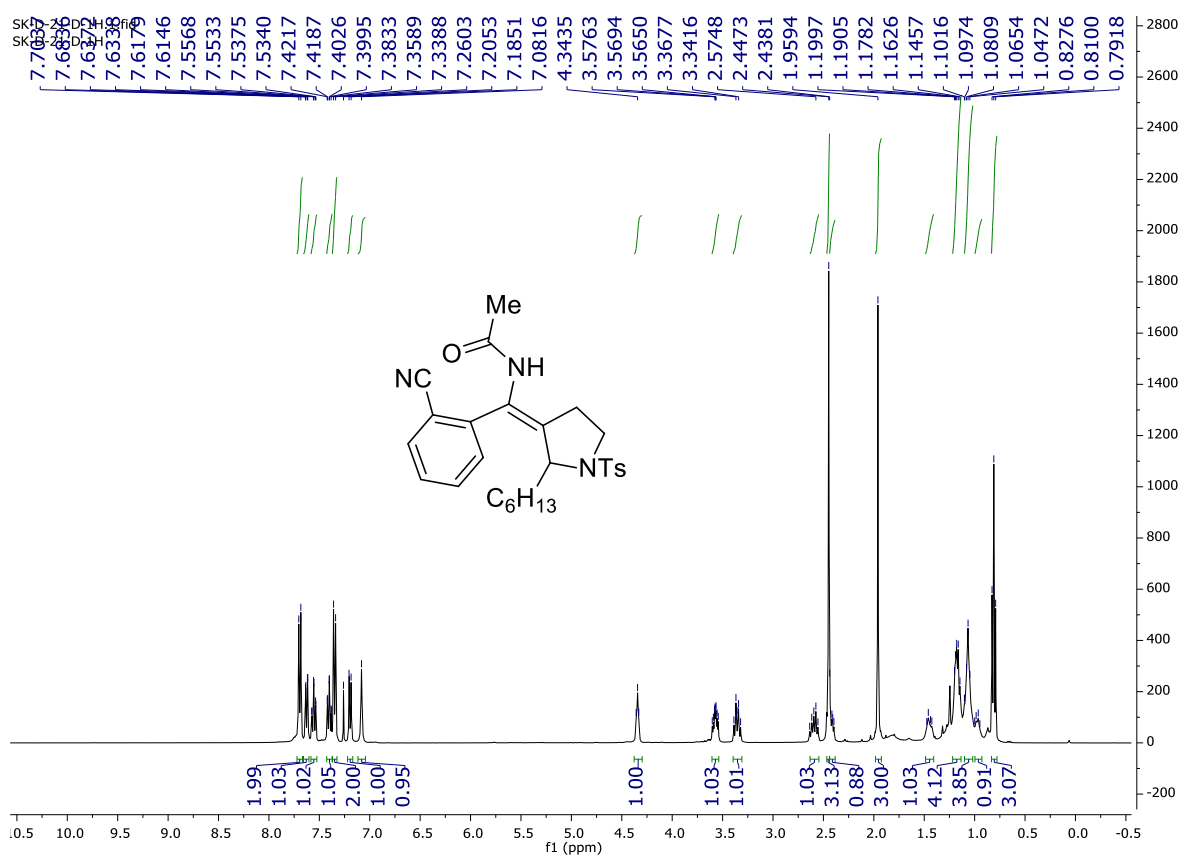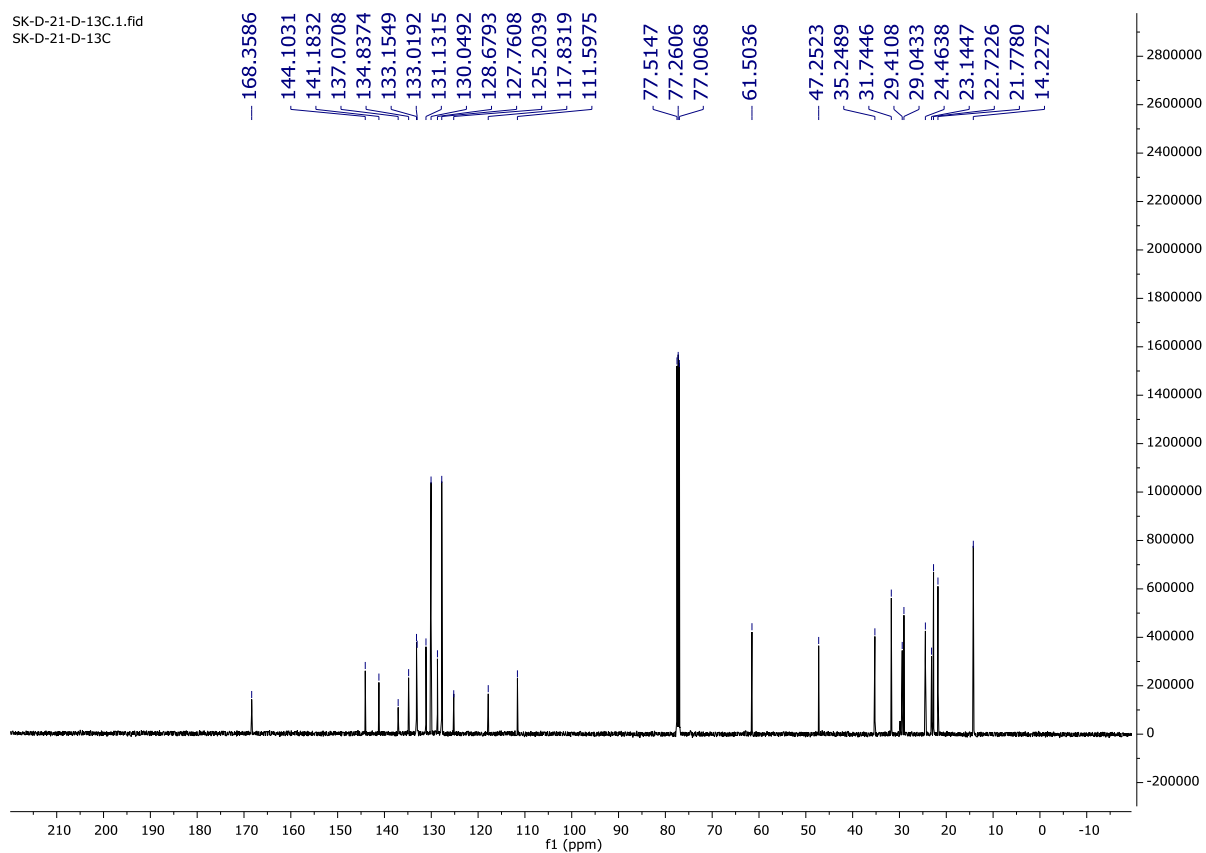

$^1\text{H}$  (400 MHz,  $\text{CDCl}_3$ ) and  $^{13}\text{C}\{^1\text{H}\}$  (125 MHz,  $\text{CDCl}_3$ ) NMR spectra of **Z-3bc**

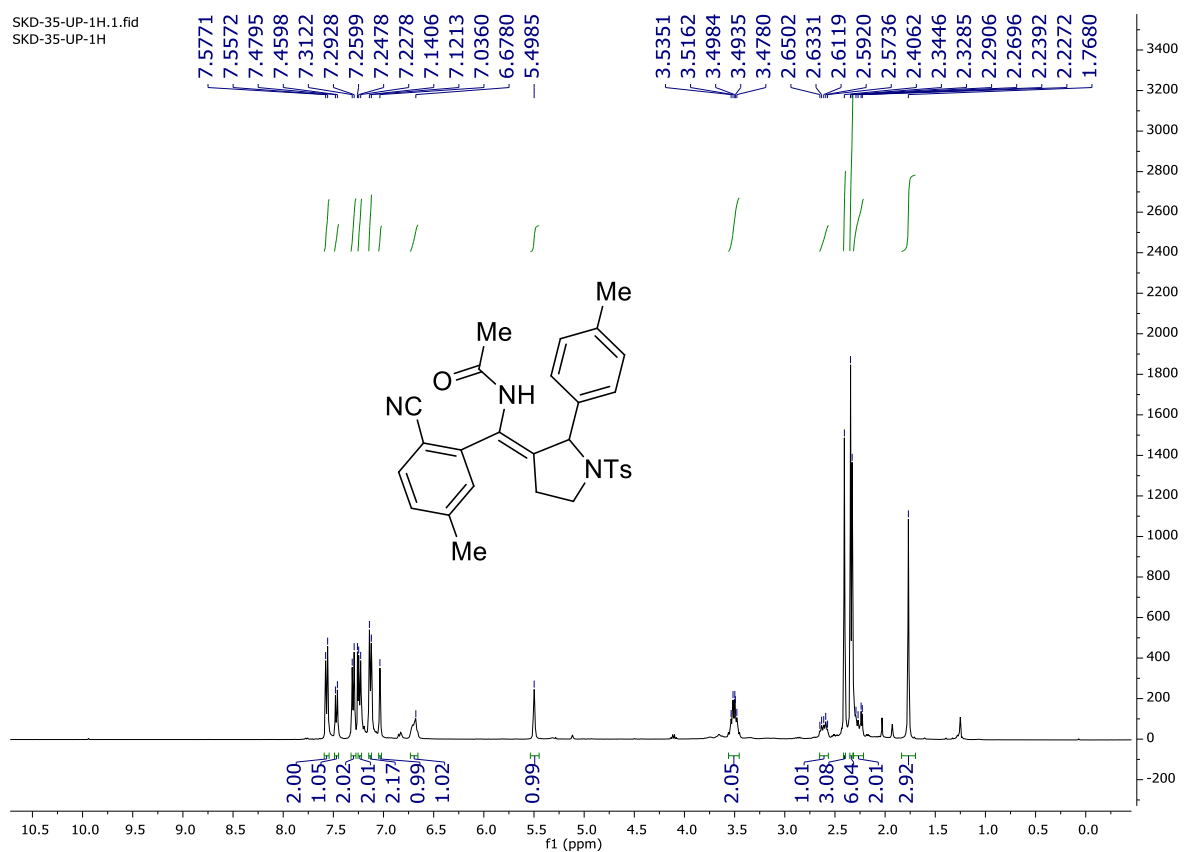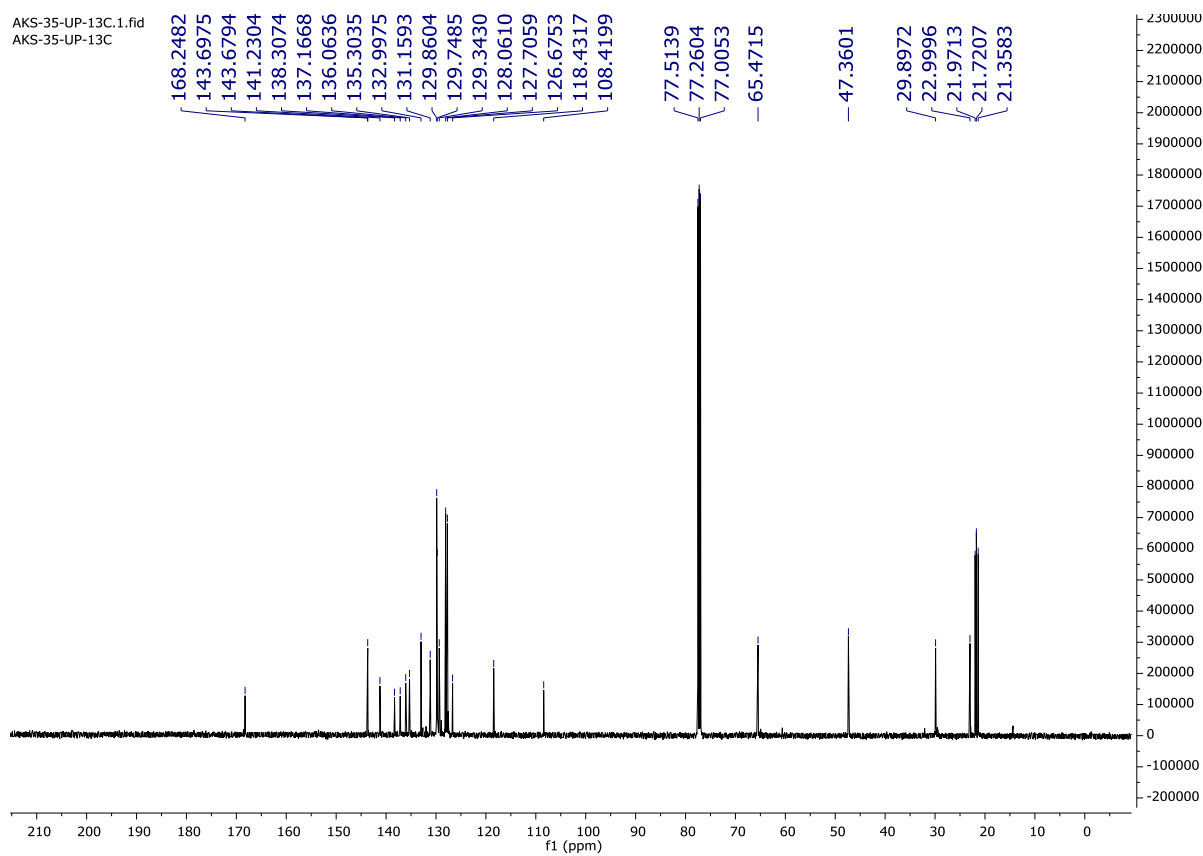

$^1\text{H}$  (400 MHz,  $\text{CDCl}_3$ ) and  $^{13}\text{C}\{^1\text{H}\}$  (125 MHz,  $\text{CDCl}_3$ ) NMR spectra of *E*-3bc

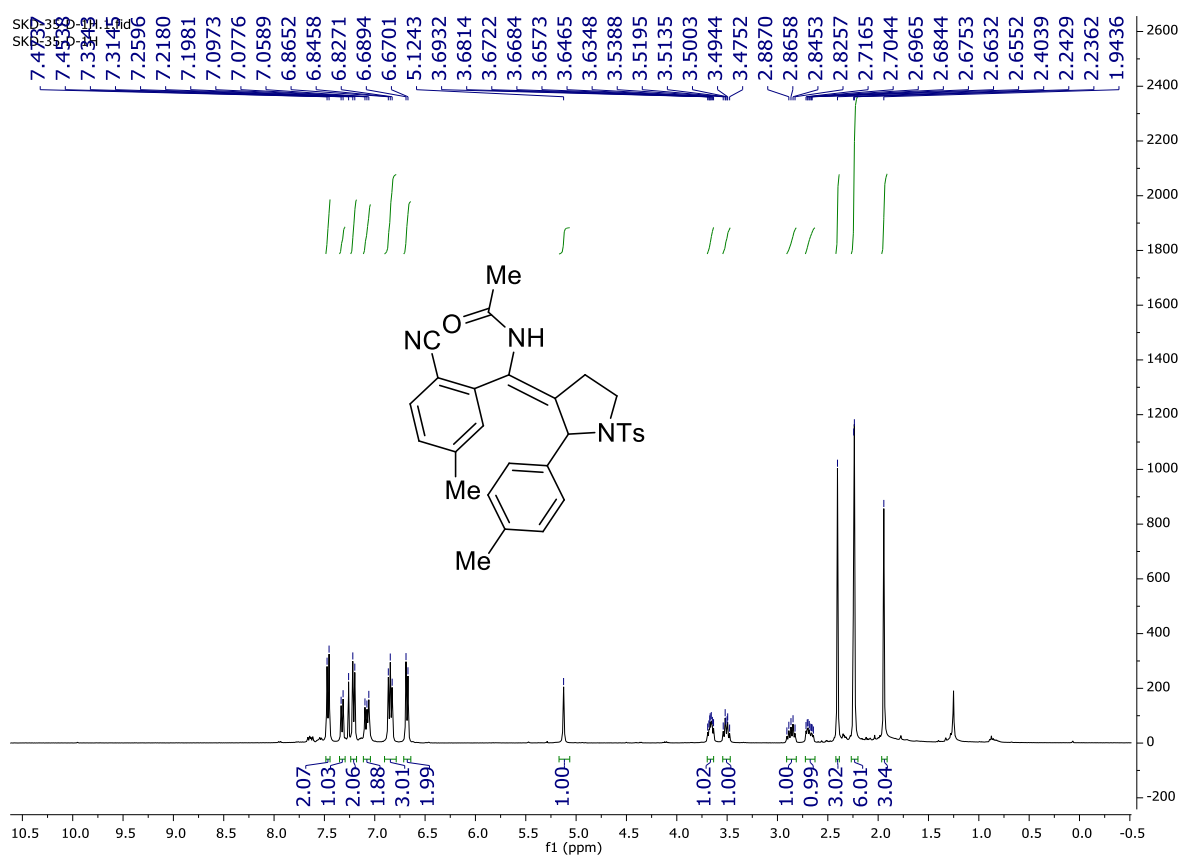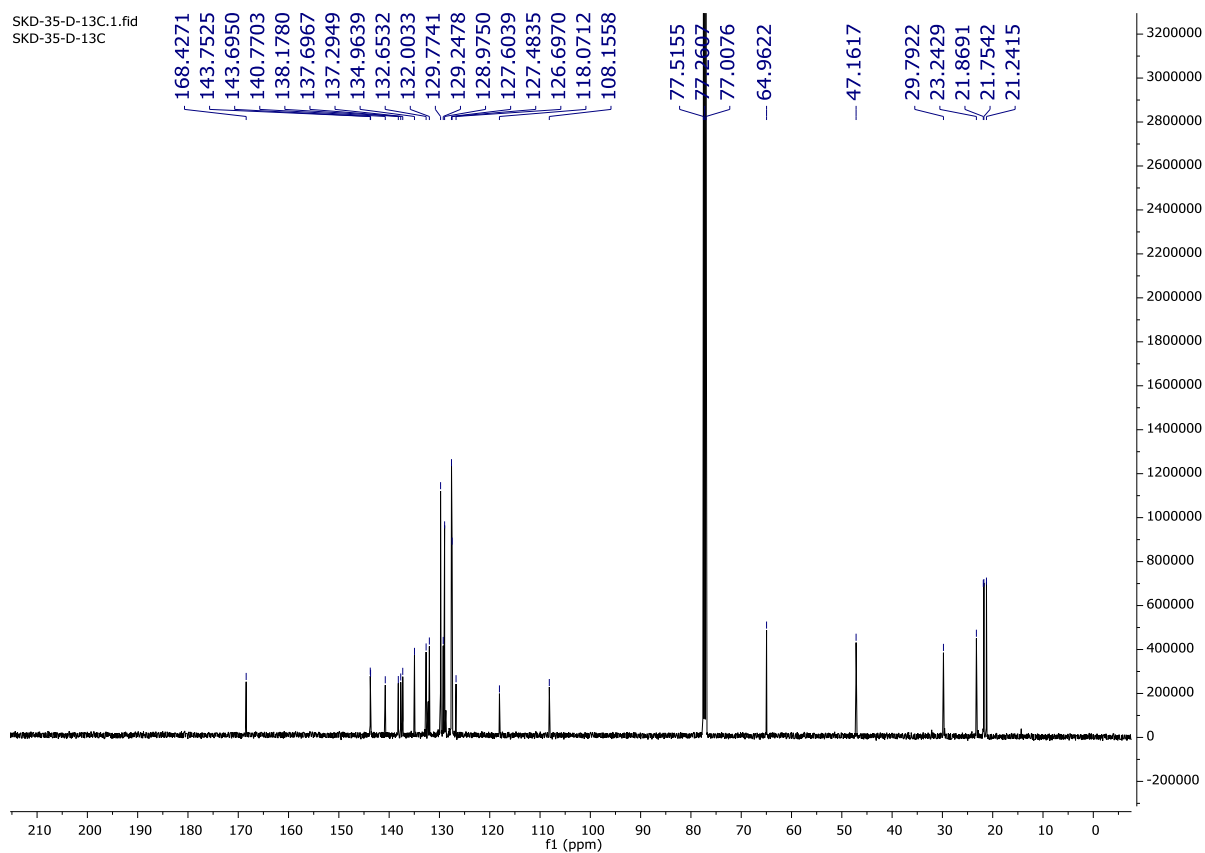

$^1\text{H}$  (400 MHz,  $\text{CDCl}_3$ ) and  $^{13}\text{C}\{^1\text{H}\}$  (125 MHz,  $\text{CDCl}_3$ ) NMR spectra of **Z-3ck**

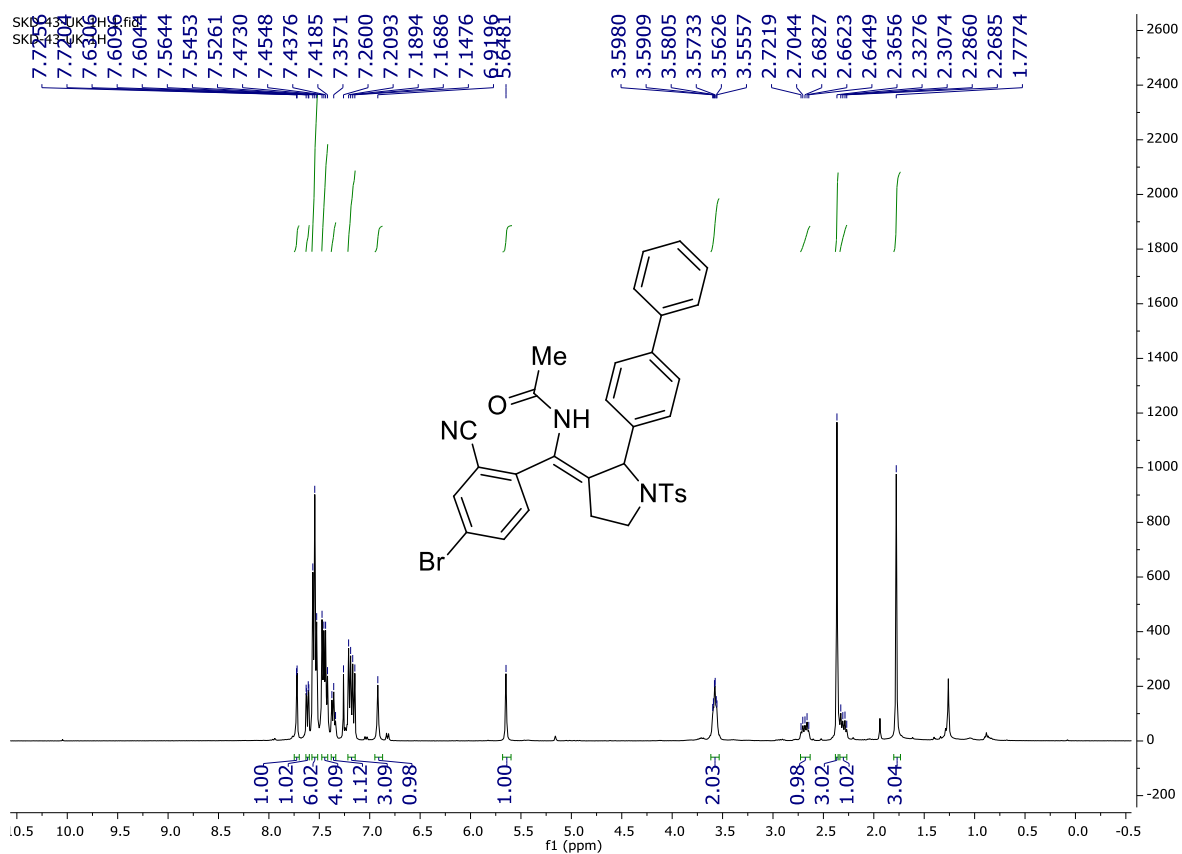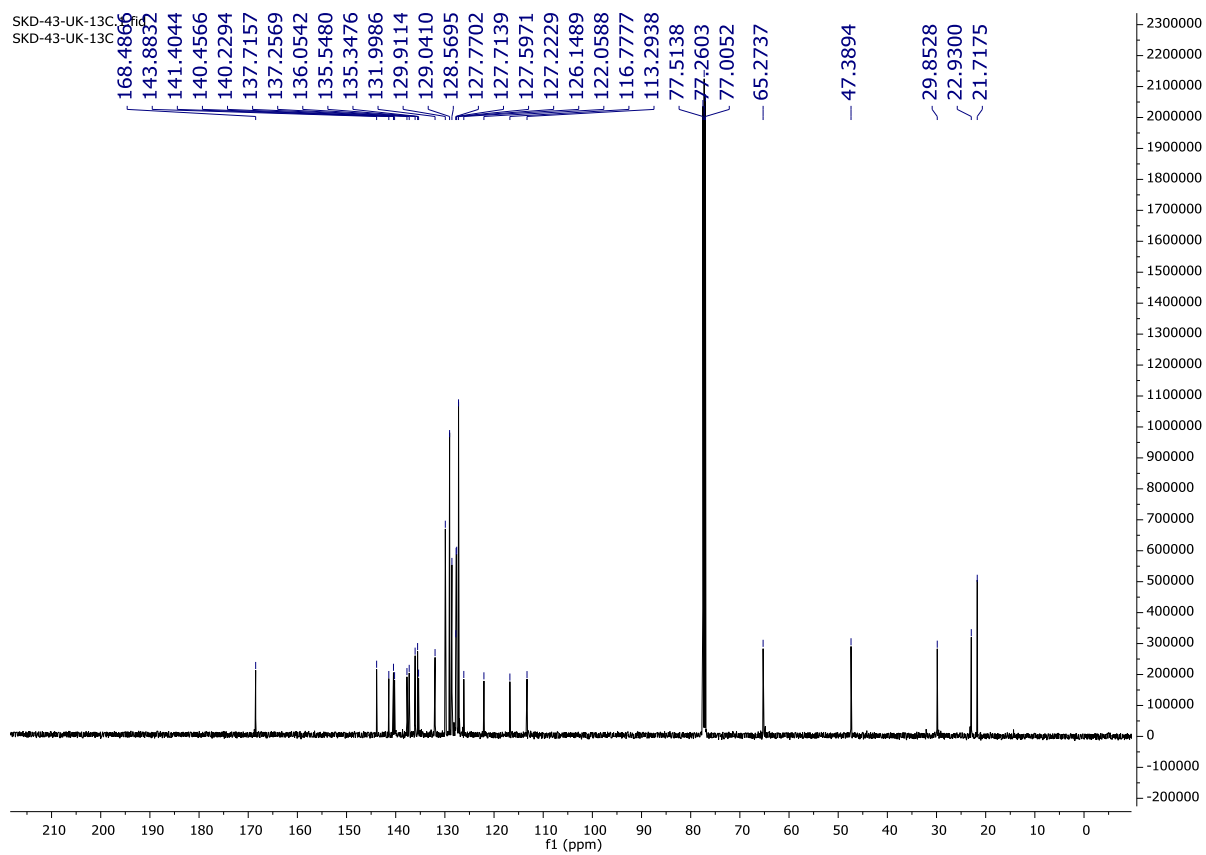

$^1\text{H}$  (400 MHz,  $\text{CDCl}_3$ ) and  $^{13}\text{C}\{^1\text{H}\}$  (125 MHz,  $\text{CDCl}_3$ ) NMR spectra of *E*-3ck

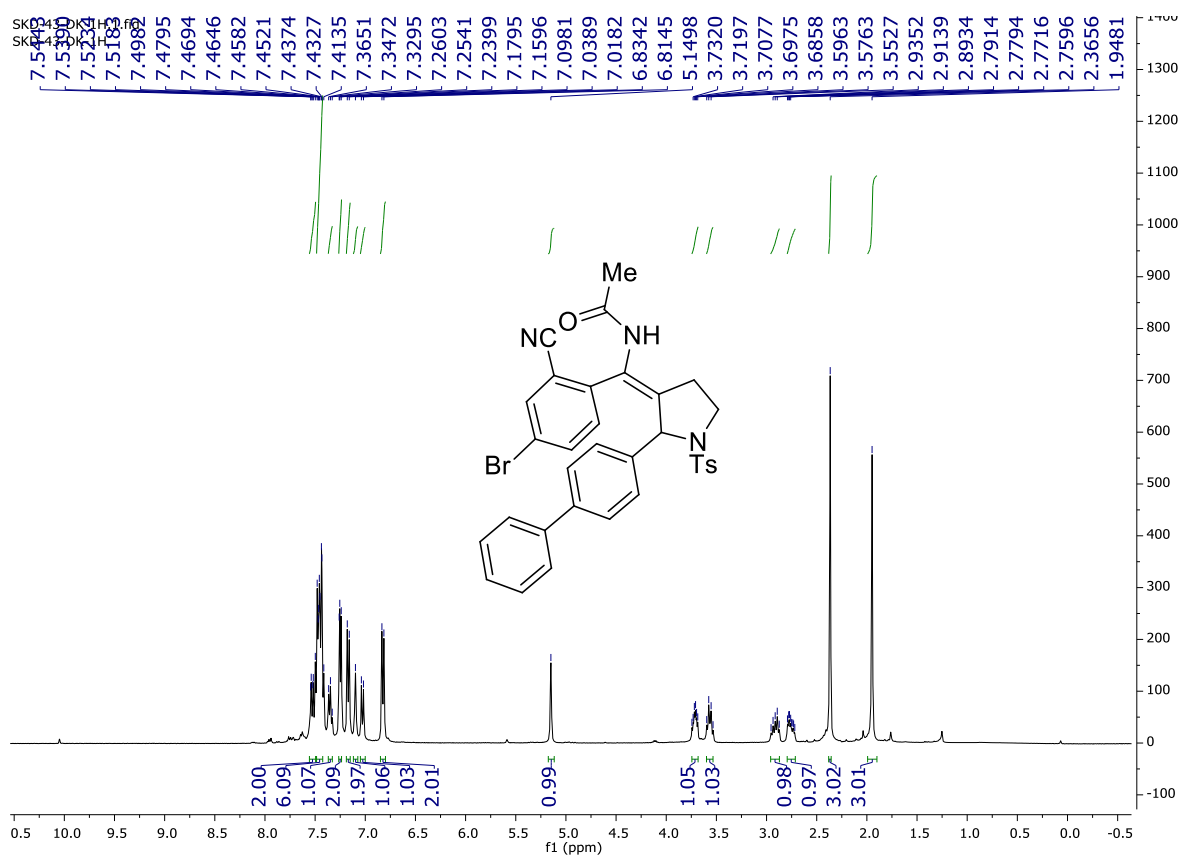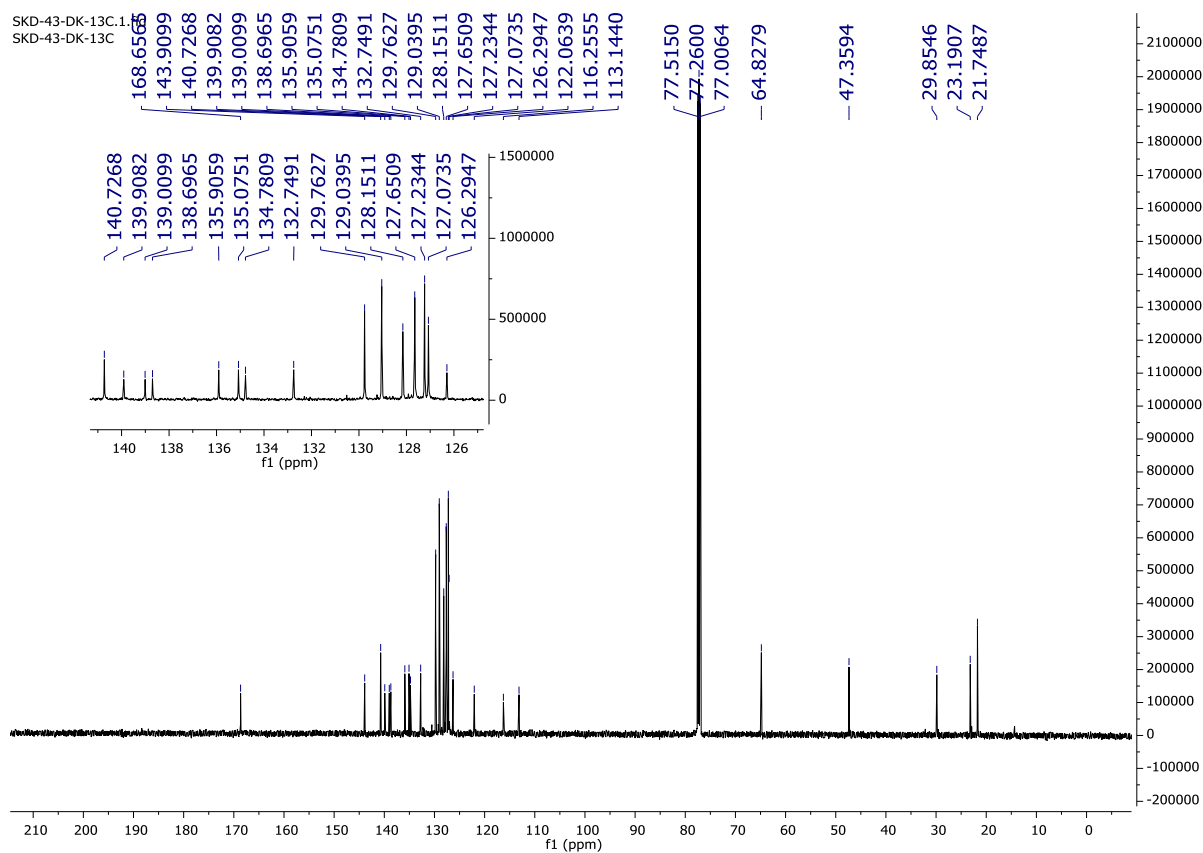

$^1\text{H}$  (400 MHz,  $\text{CDCl}_3$ ) and  $^{13}\text{C}\{^1\text{H}\}$  (125 MHz,  $\text{CDCl}_3$ ) NMR spectra of **Z-3cl**

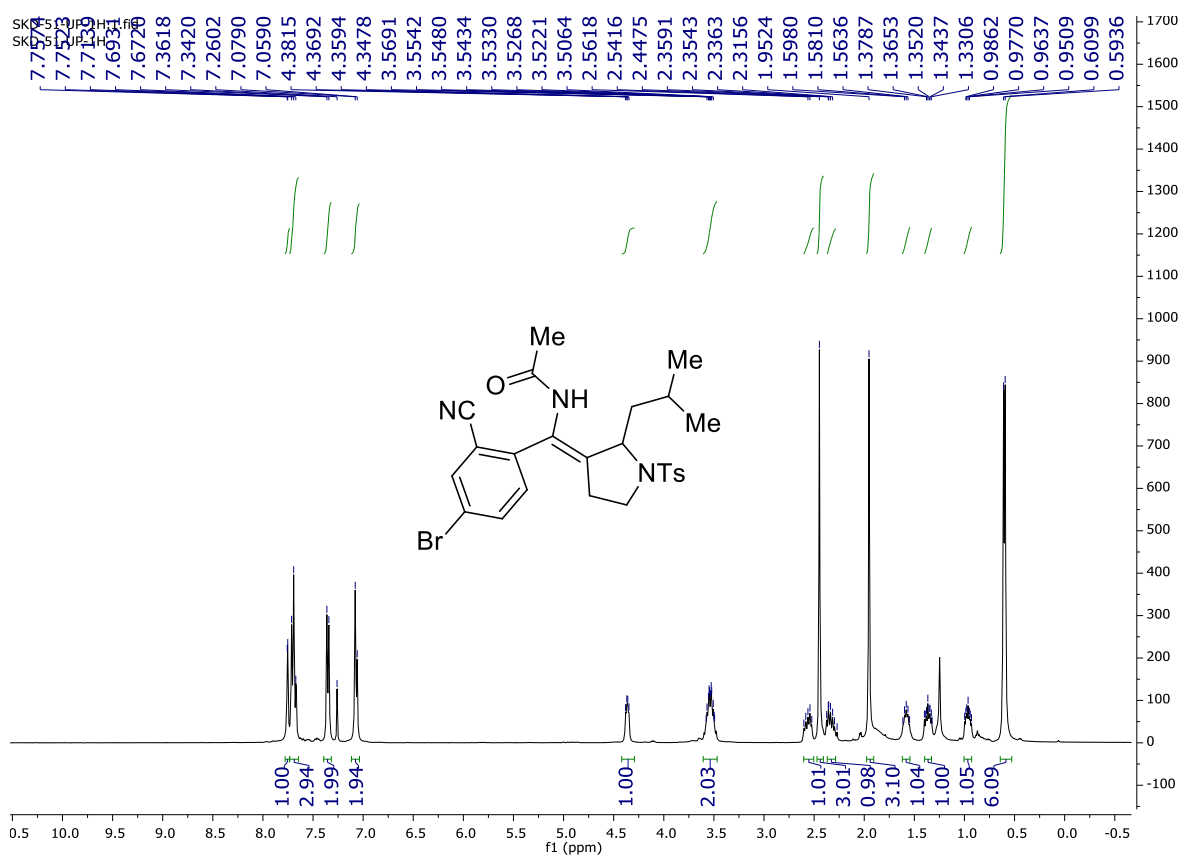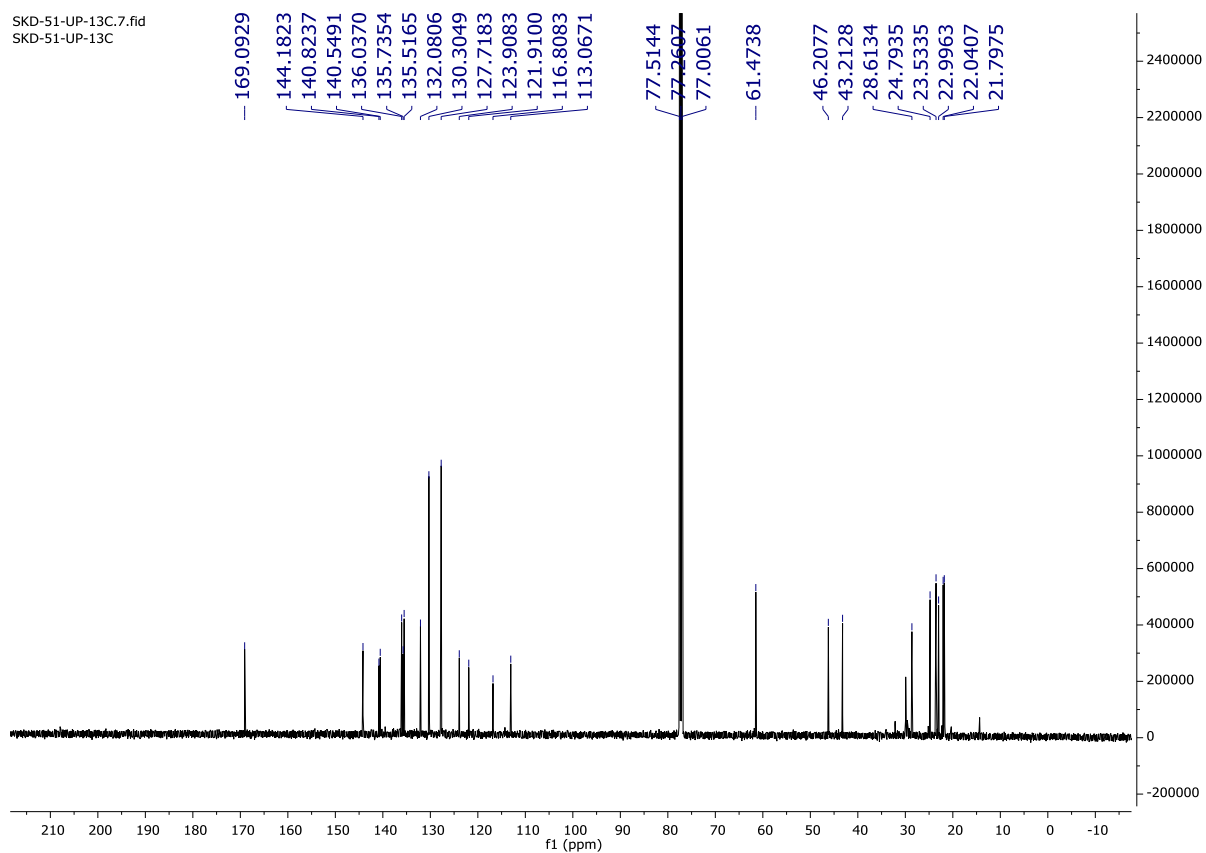



$^1\text{H}$  (400 MHz,  $\text{CDCl}_3$ ) and  $^{13}\text{C}\{^1\text{H}\}$  (125 MHz,  $\text{CDCl}_3$ ) NMR spectra of *E*-**3c1**

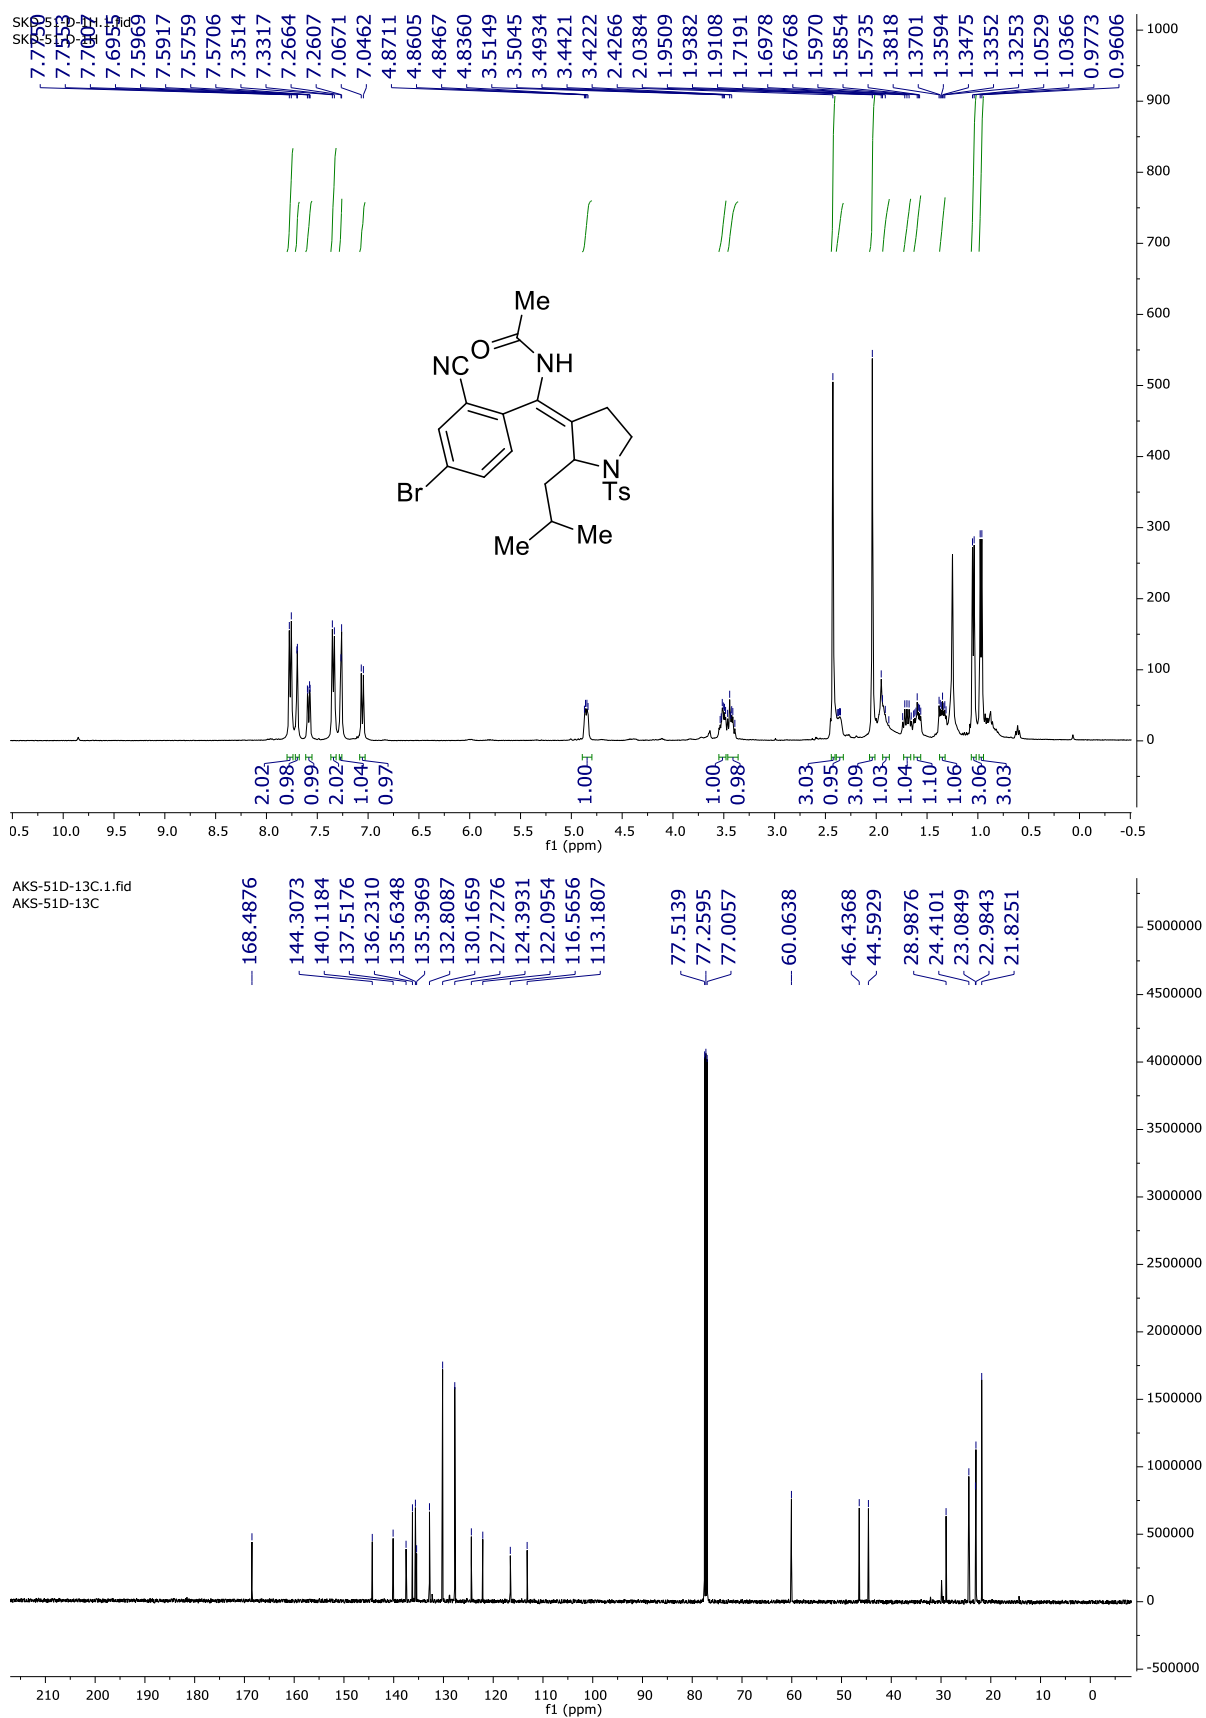



$^{19}\text{F}$  (471 MHz,  $\text{CDCl}_3$ ) NMR spectrum of **Z-3dc**

SKD-52-6F-UP-19F.1.fid  
SKD-52-6F-UP-19F

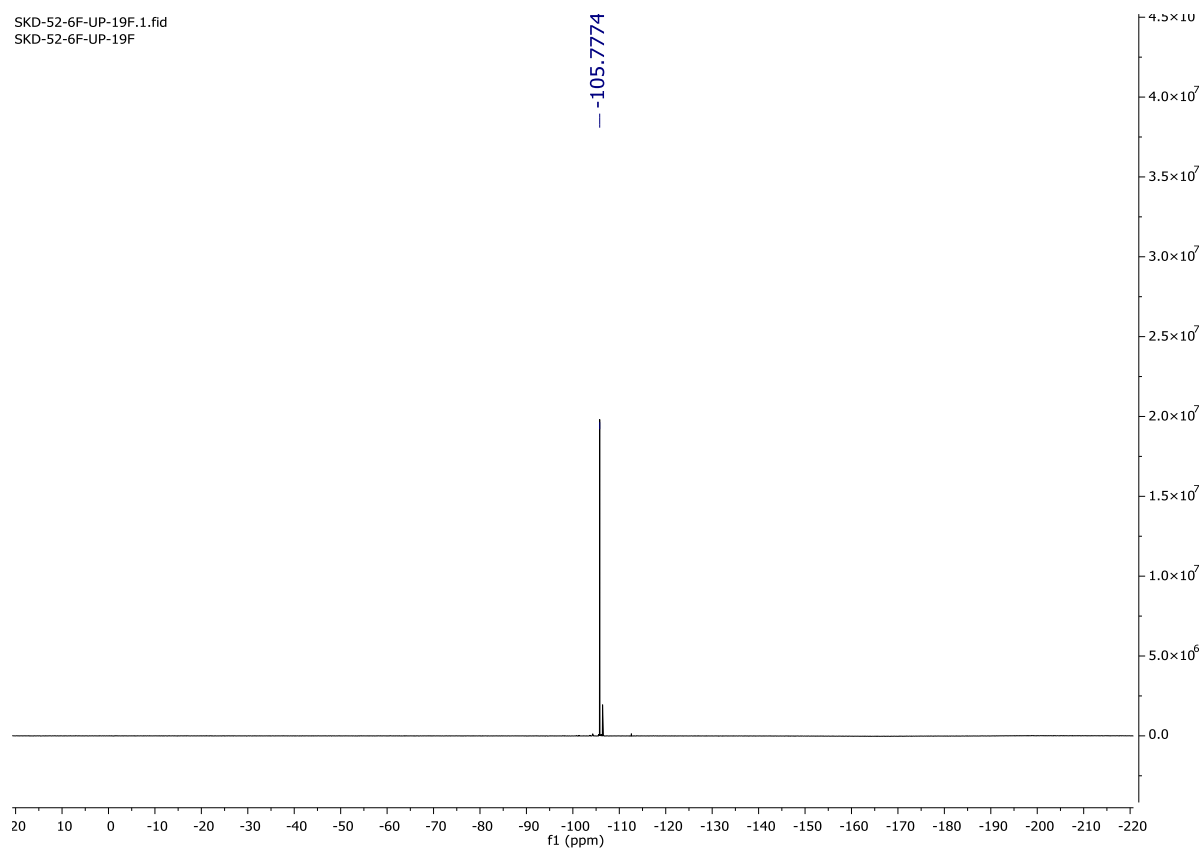

$^1\text{H}$  (400 MHz,  $\text{CDCl}_3$ ) and  $^{13}\text{C}\{^1\text{H}\}$  (150 MHz,  $\text{CDCl}_3$ ) NMR spectra of *E*-3dc

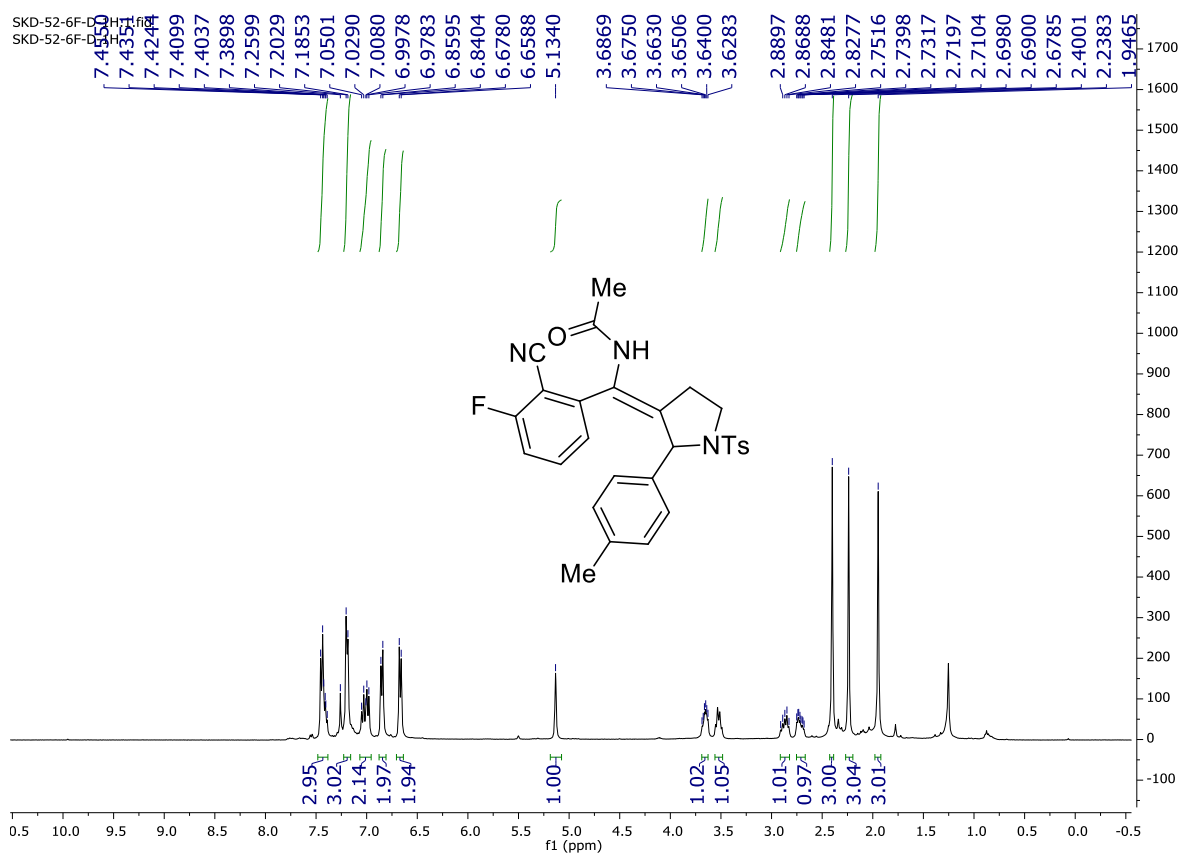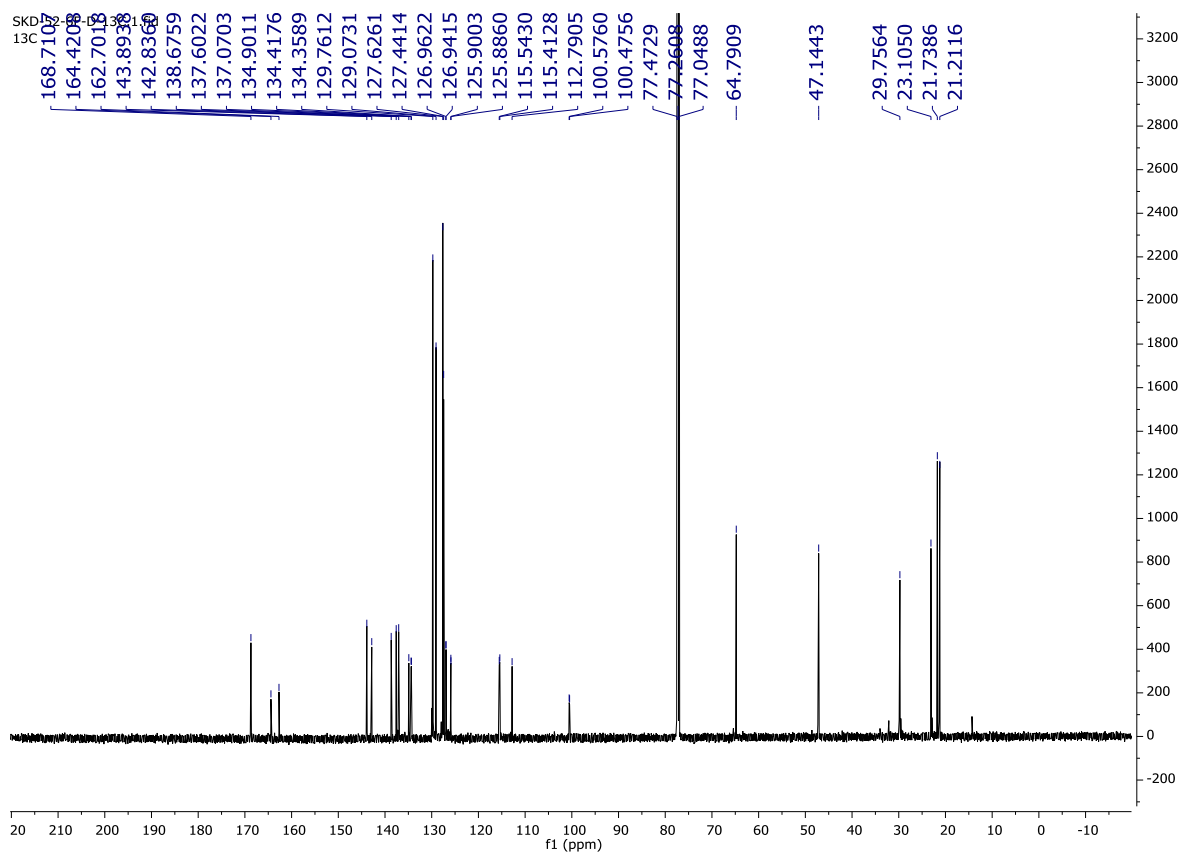

$^{19}\text{F}$  (471 MHz,  $\text{CDCl}_3$ ) NMR spectrum of *E*-3dc

SKD-52-6F-D-19F.1.fid  
SKD-52-6F-D-19F

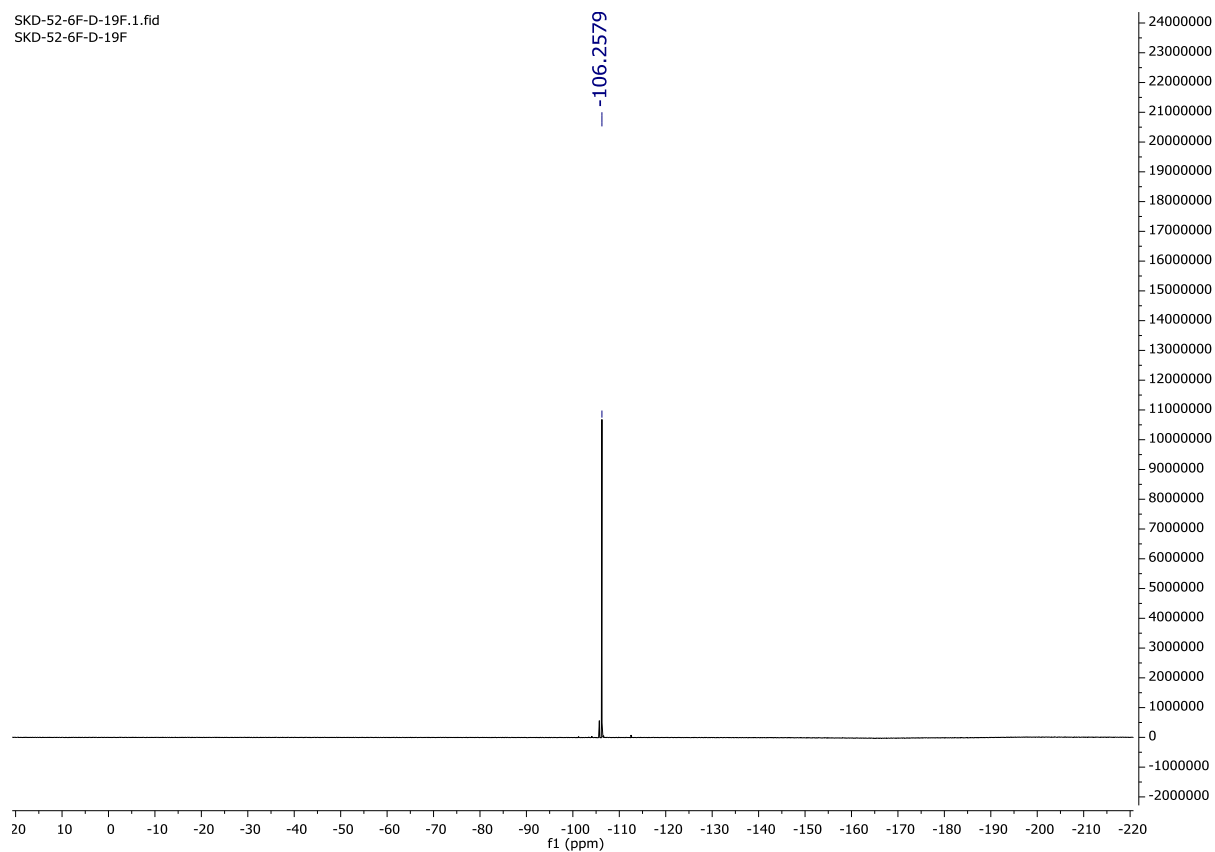

$^1\text{H}$  (400 MHz,  $\text{CDCl}_3$ ),  $^{13}\text{C}$  { $^1\text{H}$ } (150 MHz,  $\text{CDCl}_3$ ) NMR spectra of **Z-3dm**

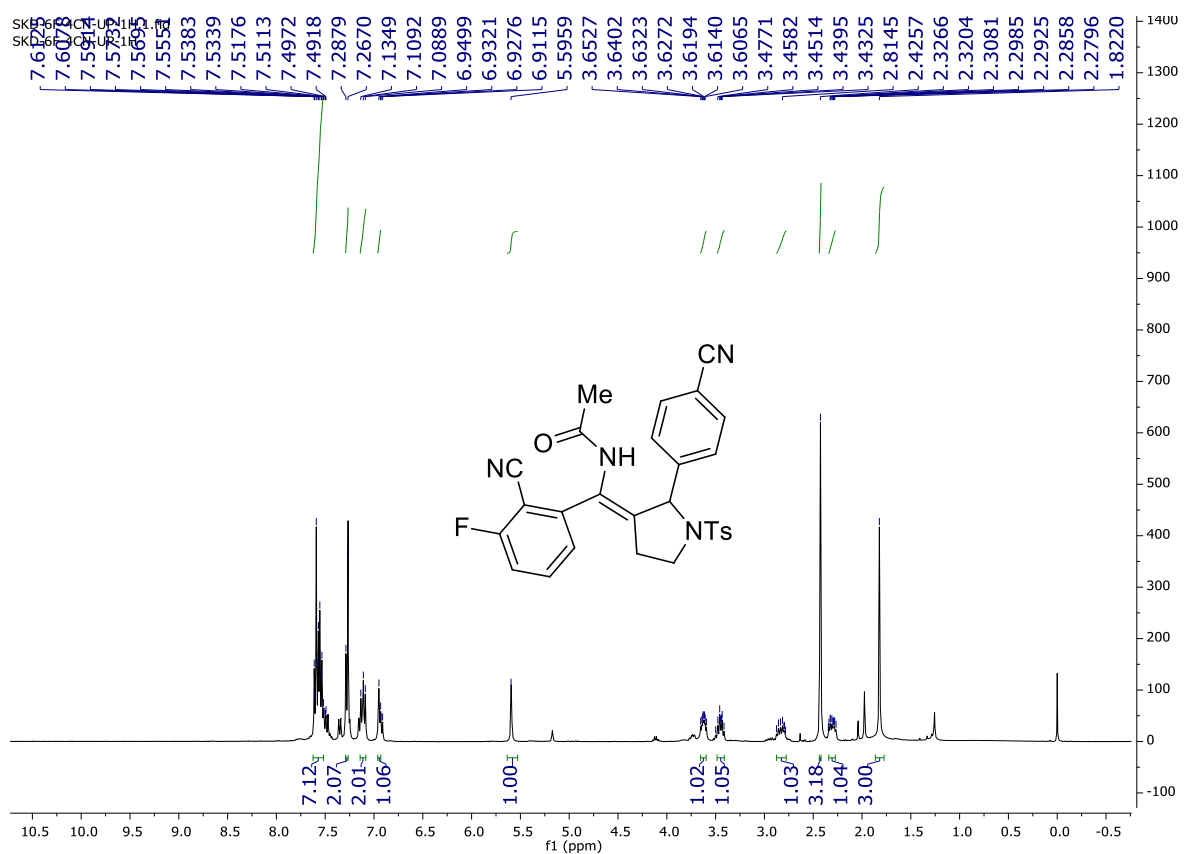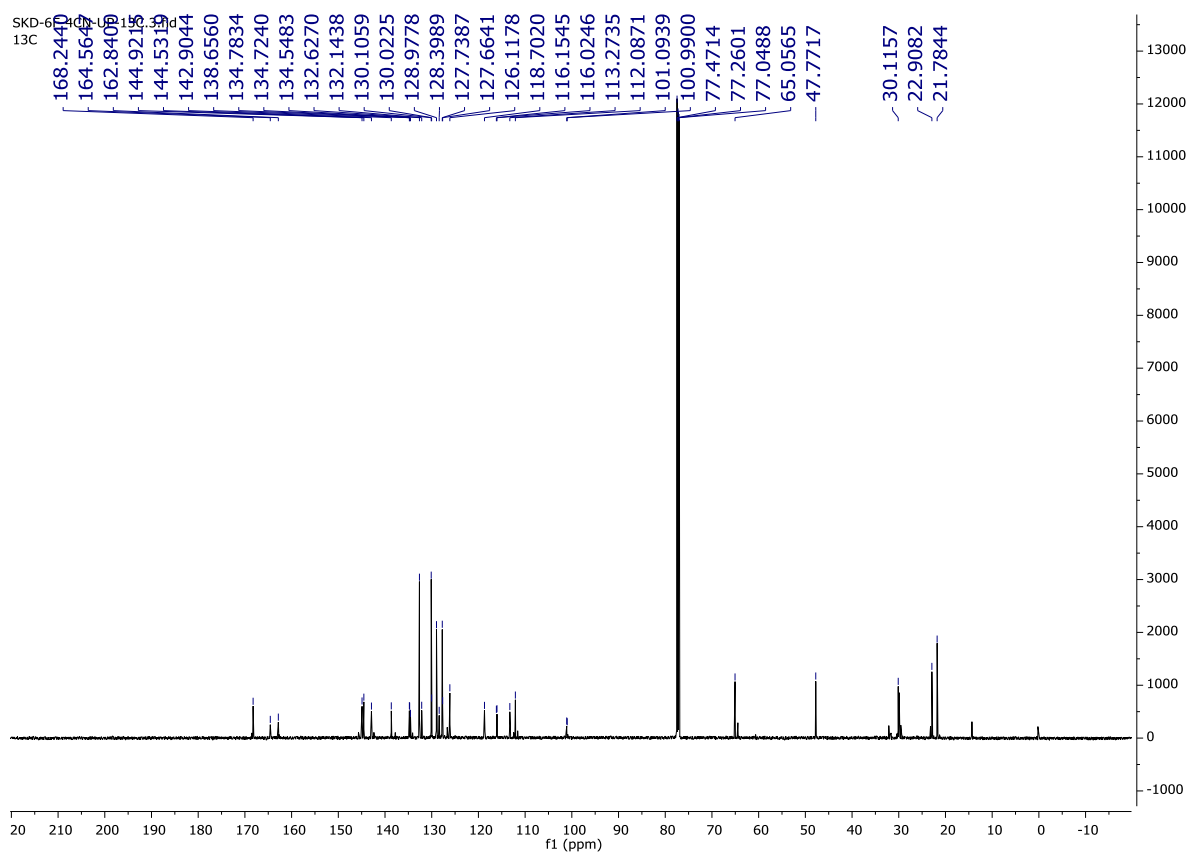

$^{19}\text{F}$  (565 MHz,  $\text{CDCl}_3$ ) NMR spectrum of **Z-3dm**

SKD-6F-4CN-UP-19F.1.fid  
19F

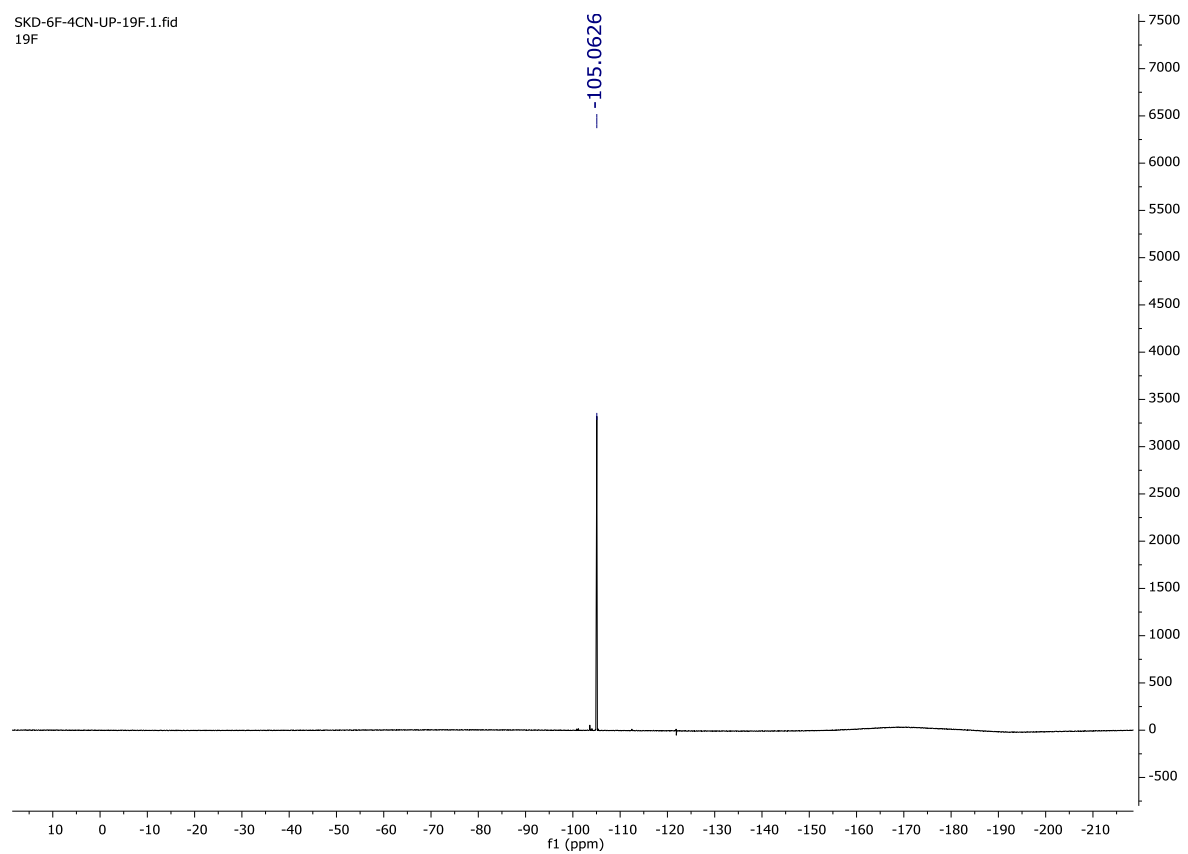

$^1\text{H}$  (400 MHz,  $\text{CDCl}_3$ ),  $^{13}\text{C}\{^1\text{H}\}$  (125 MHz,  $\text{CDCl}_3$ ) NMR spectra of *E*-3dm

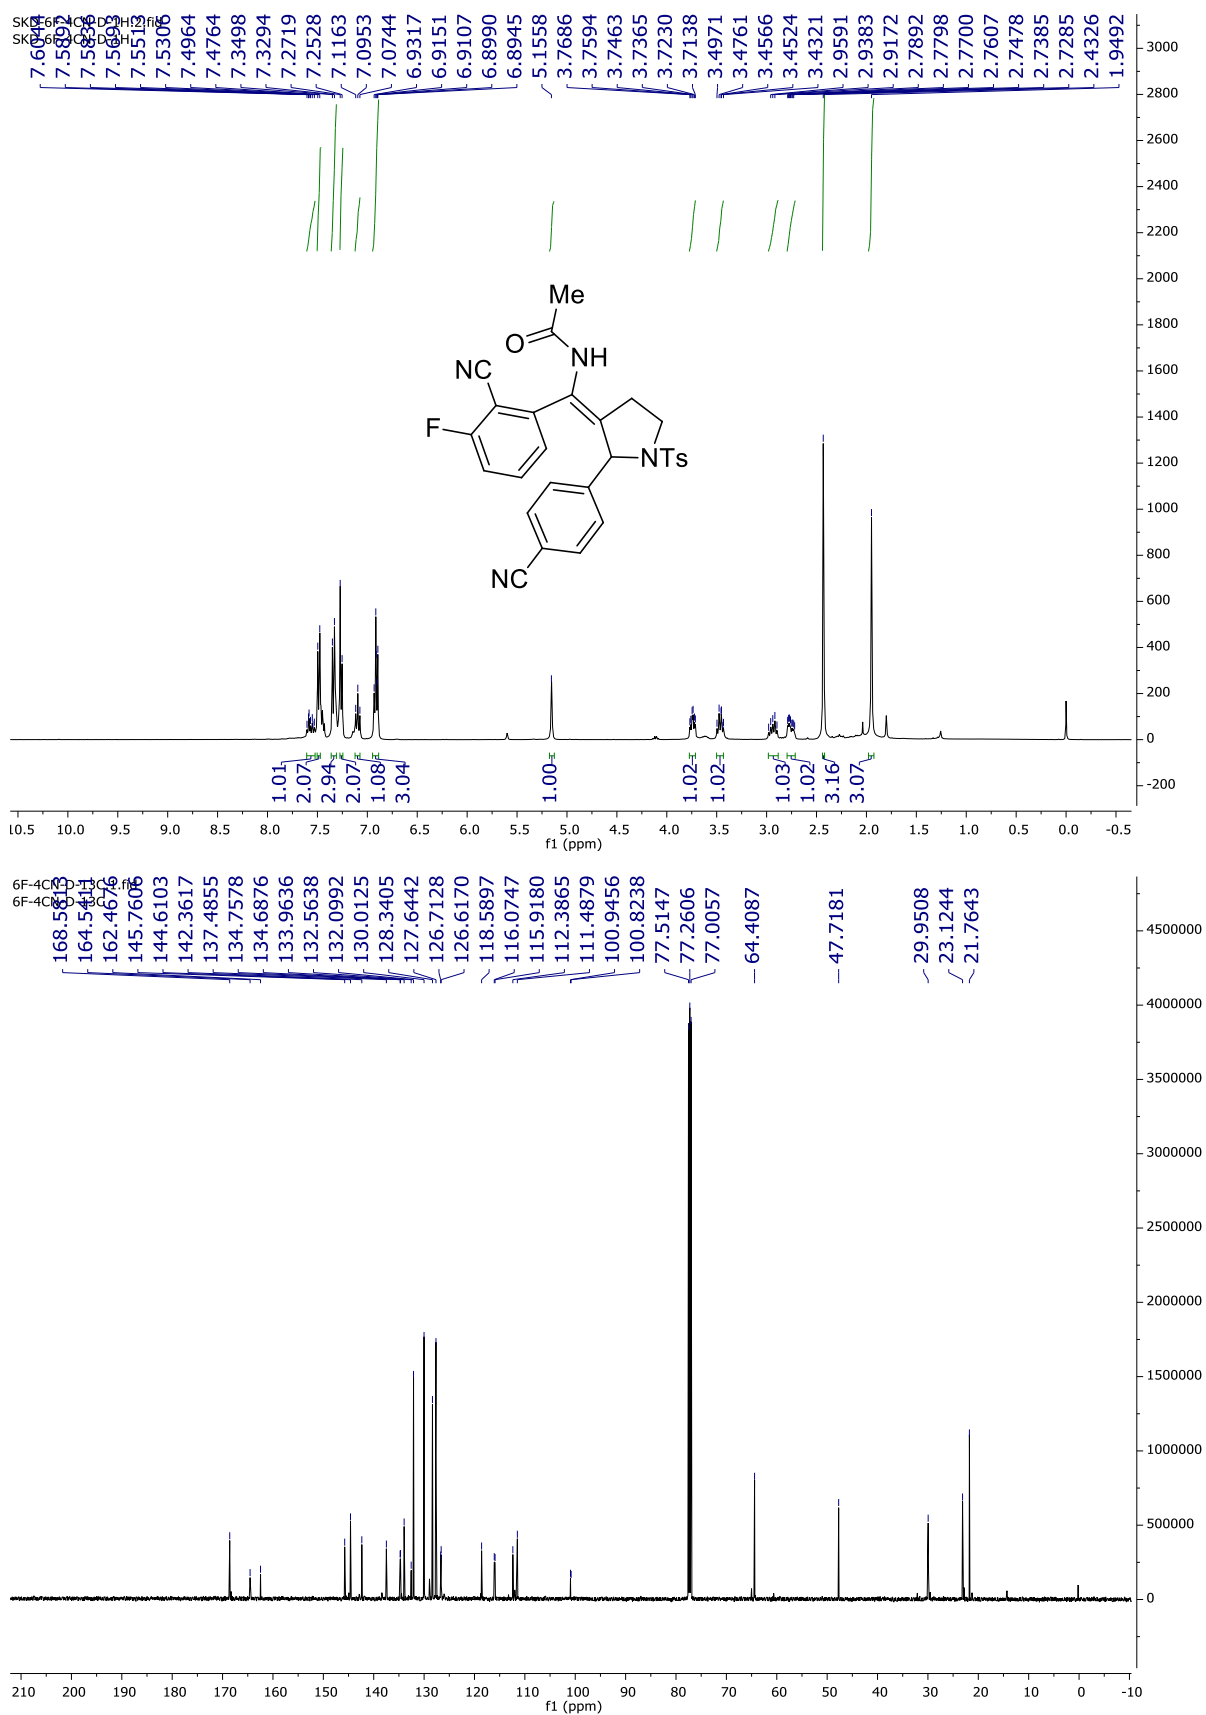



$^{19}\text{F}$  (471 MHz,  $\text{CDCl}_3$ ) NMR spectrum of *E*-3dm

6F-4CN-D-19F.3.fid  
6F-4CN-D-19F

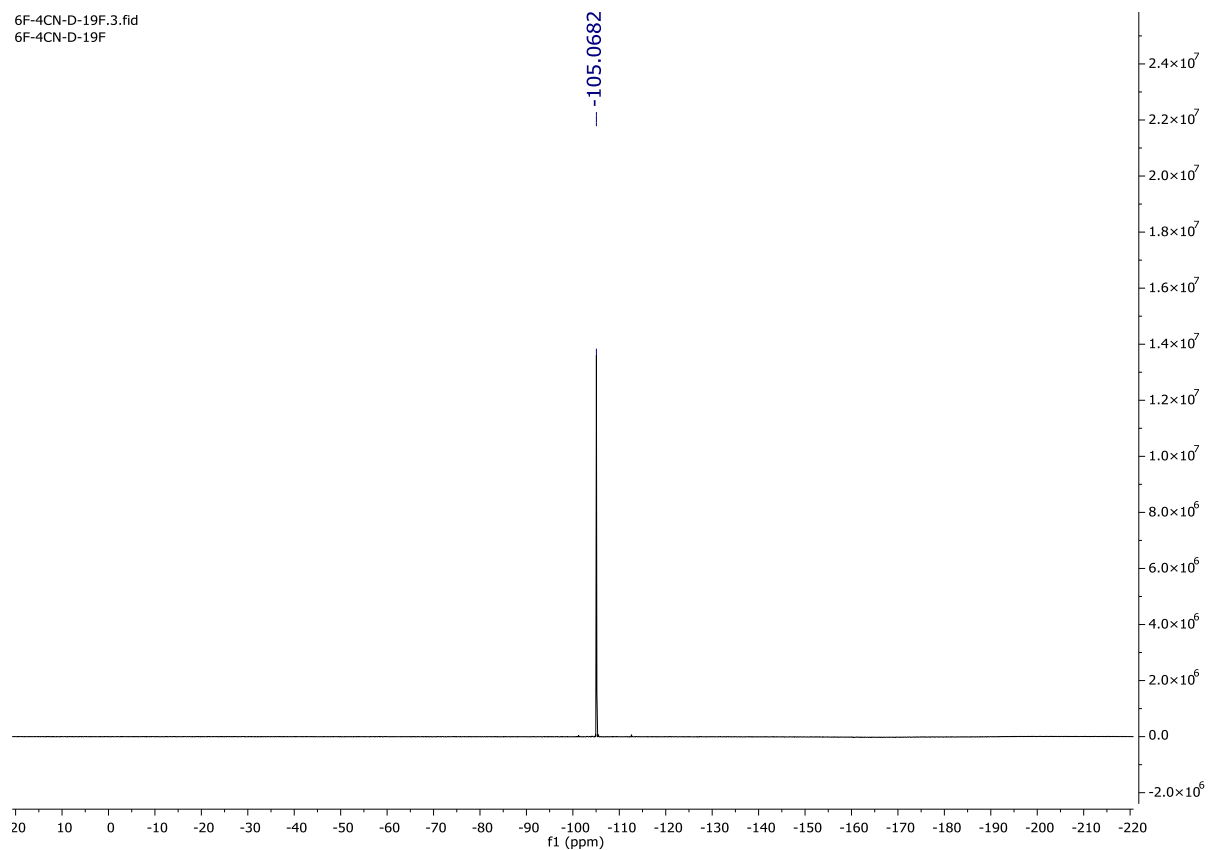

$^1\text{H}$  (500 MHz,  $\text{CDCl}_3$ ) and  $^{13}\text{C}\{^1\text{H}\}$  (125 MHz,  $\text{CDCl}_3$ ) NMR spectra of **Z-4ec**

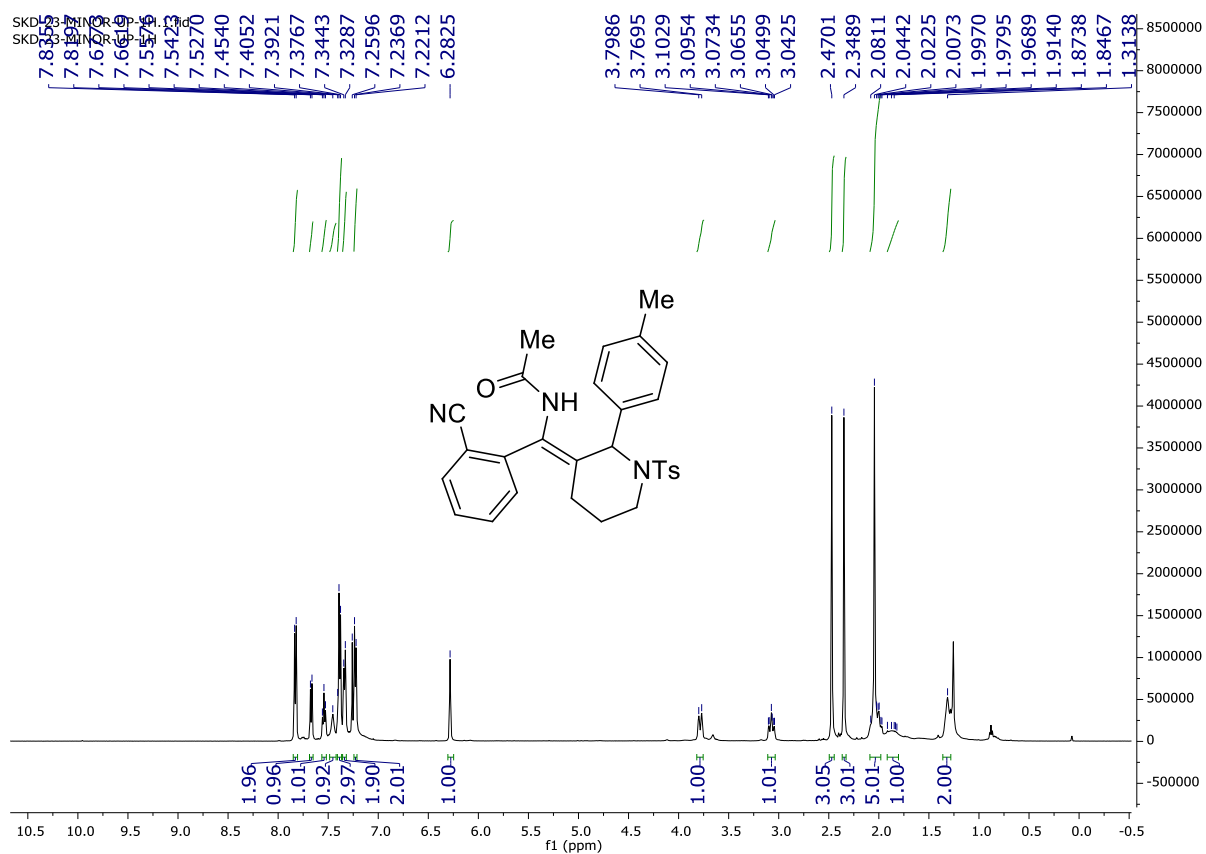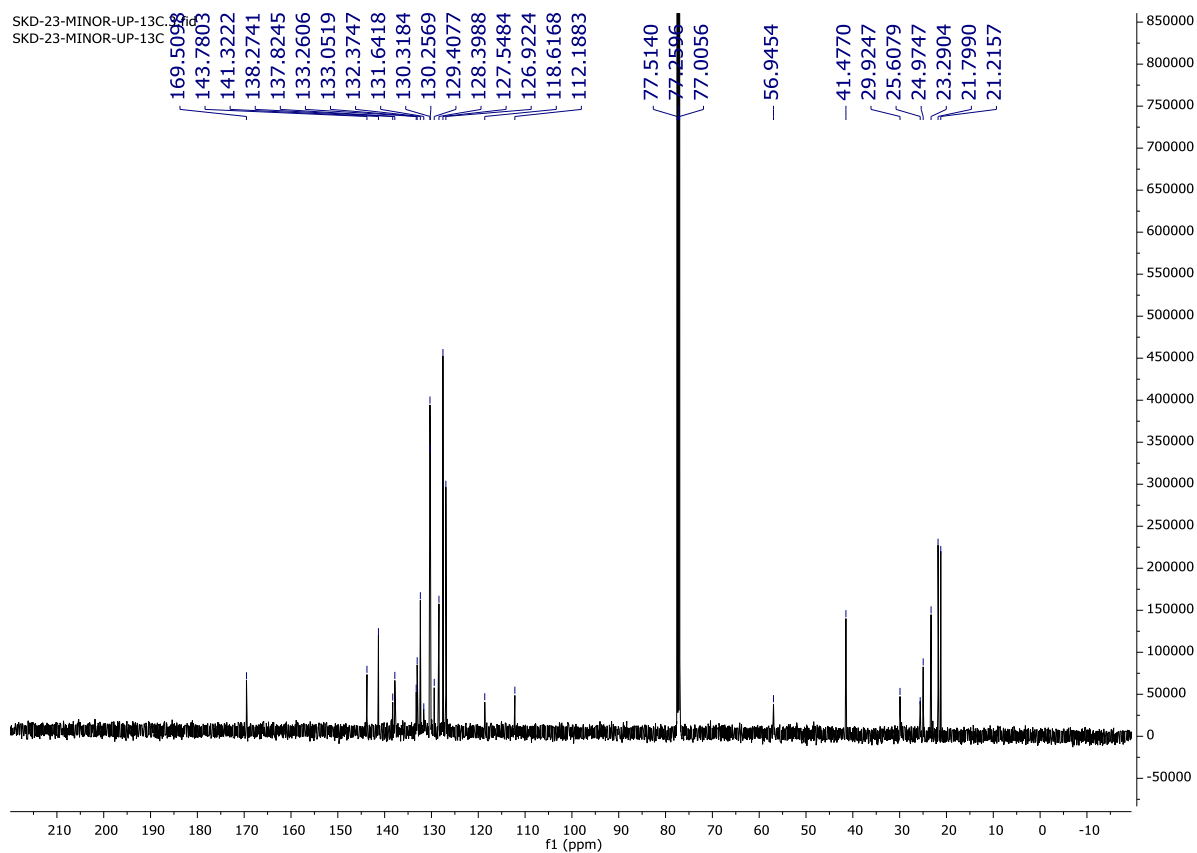

$^1\text{H}$  (400 MHz,  $\text{CDCl}_3$ ) and  $^{13}\text{C}\{^1\text{H}\}$  (125 MHz,  $\text{CDCl}_3$ ) NMR spectra of *E*-4ec

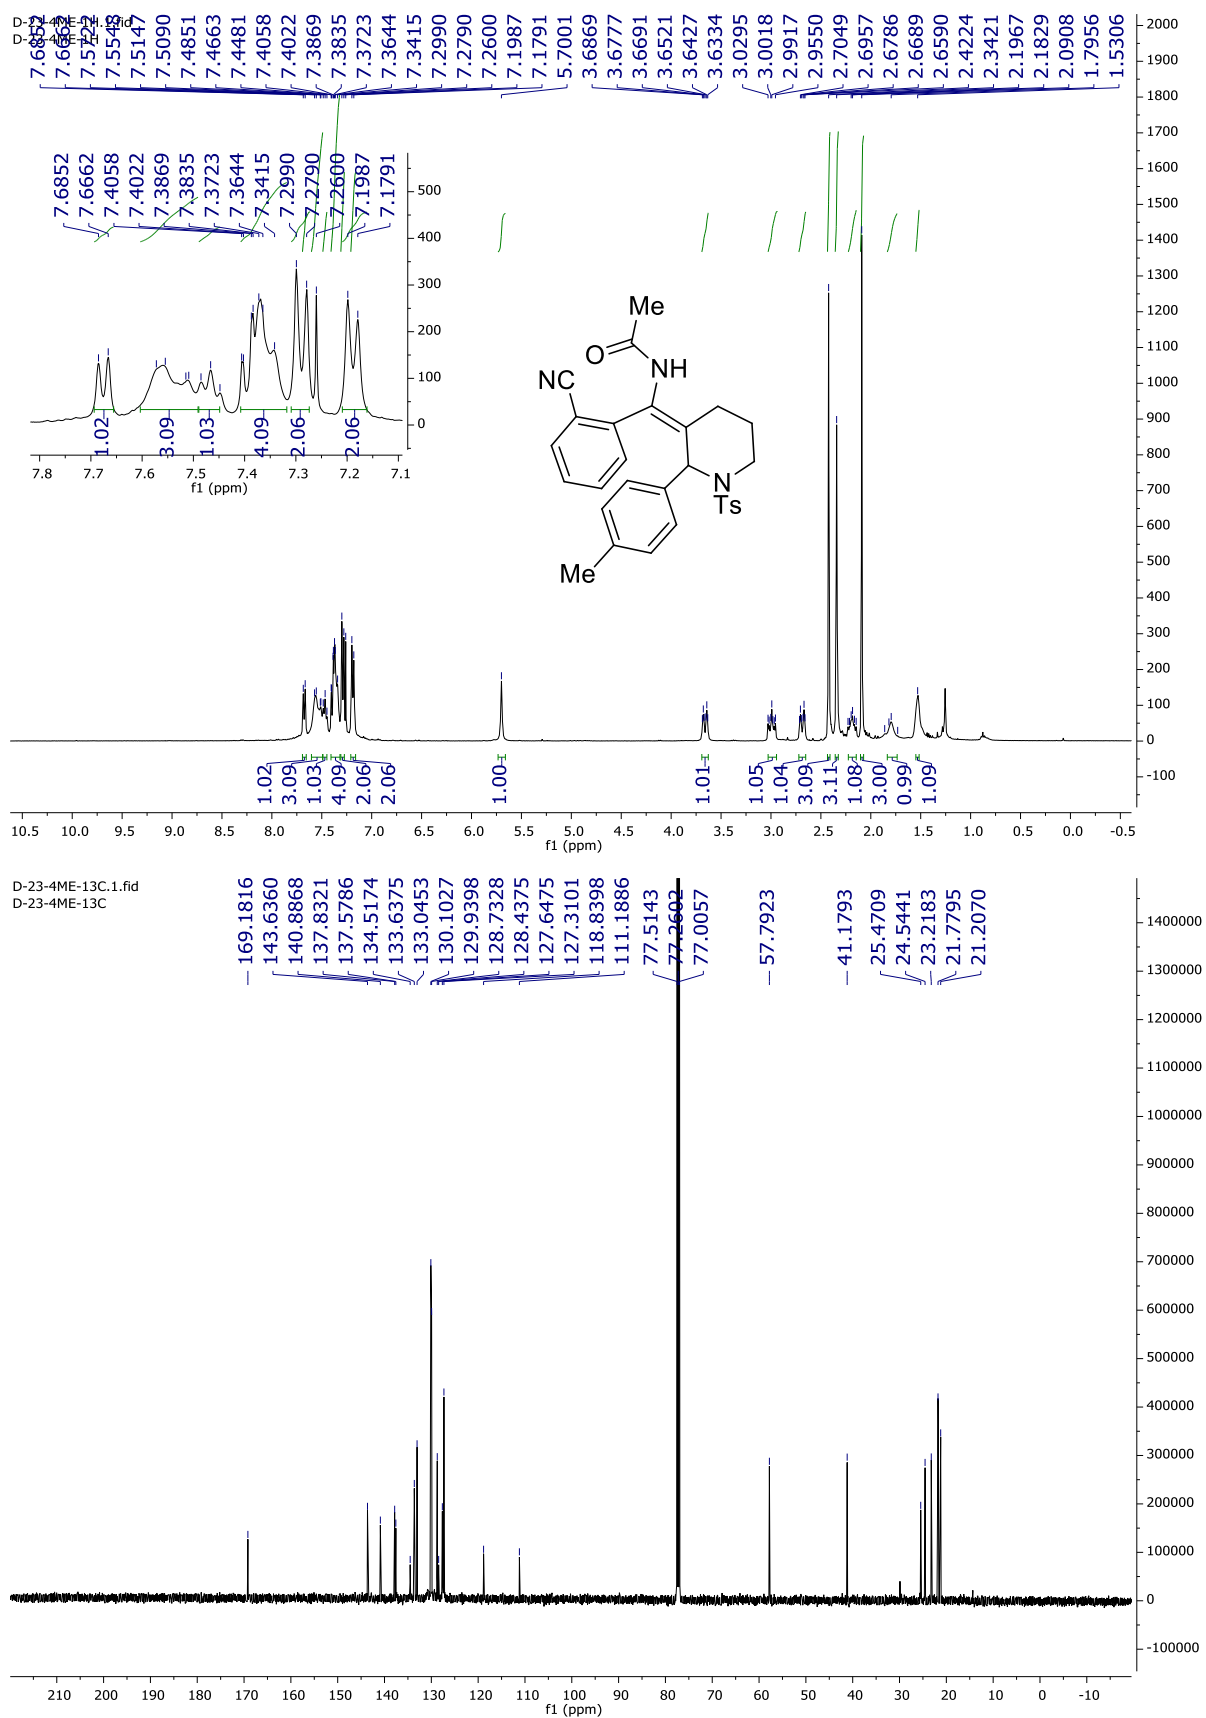

$^1\text{H}$  (400 MHz,  $\text{CDCl}_3$ ) and  $^{13}\text{C}\{^1\text{H}\}$  (125 MHz,  $\text{CDCl}_3$ ) NMR spectra of **Z-4en**

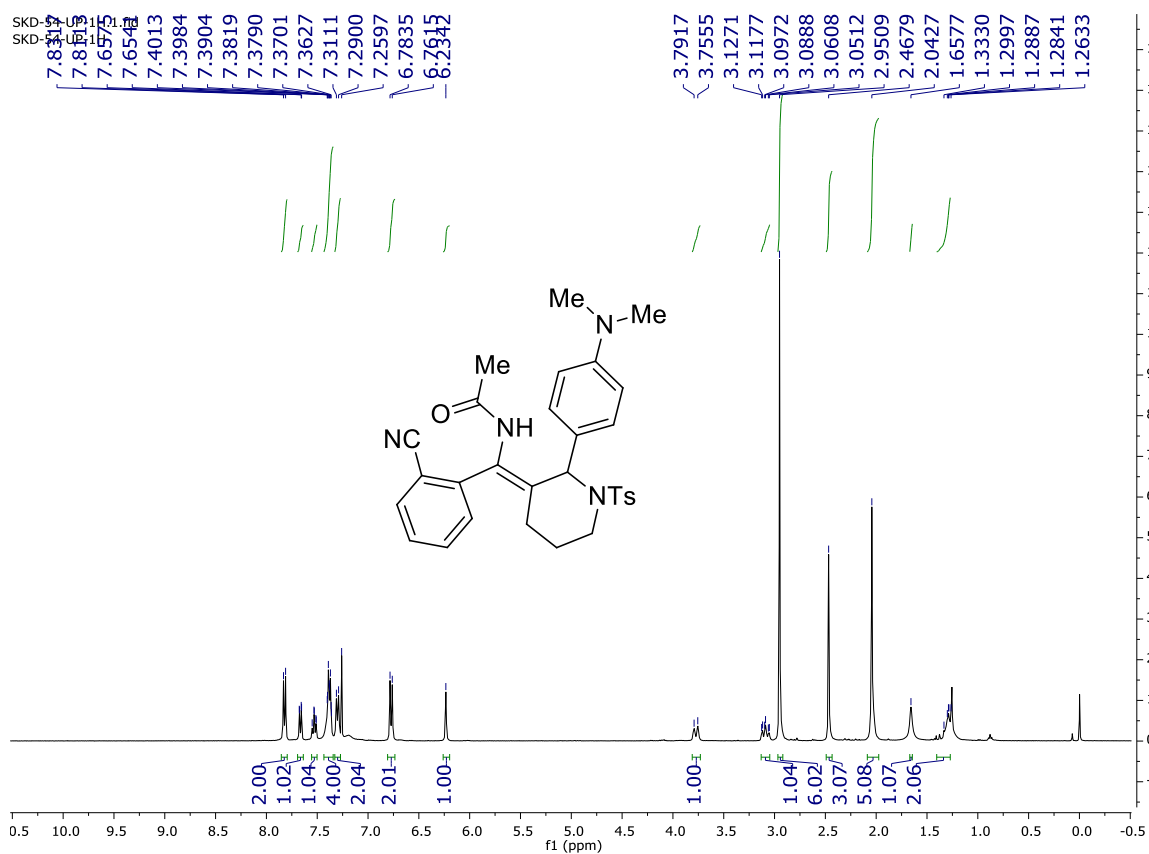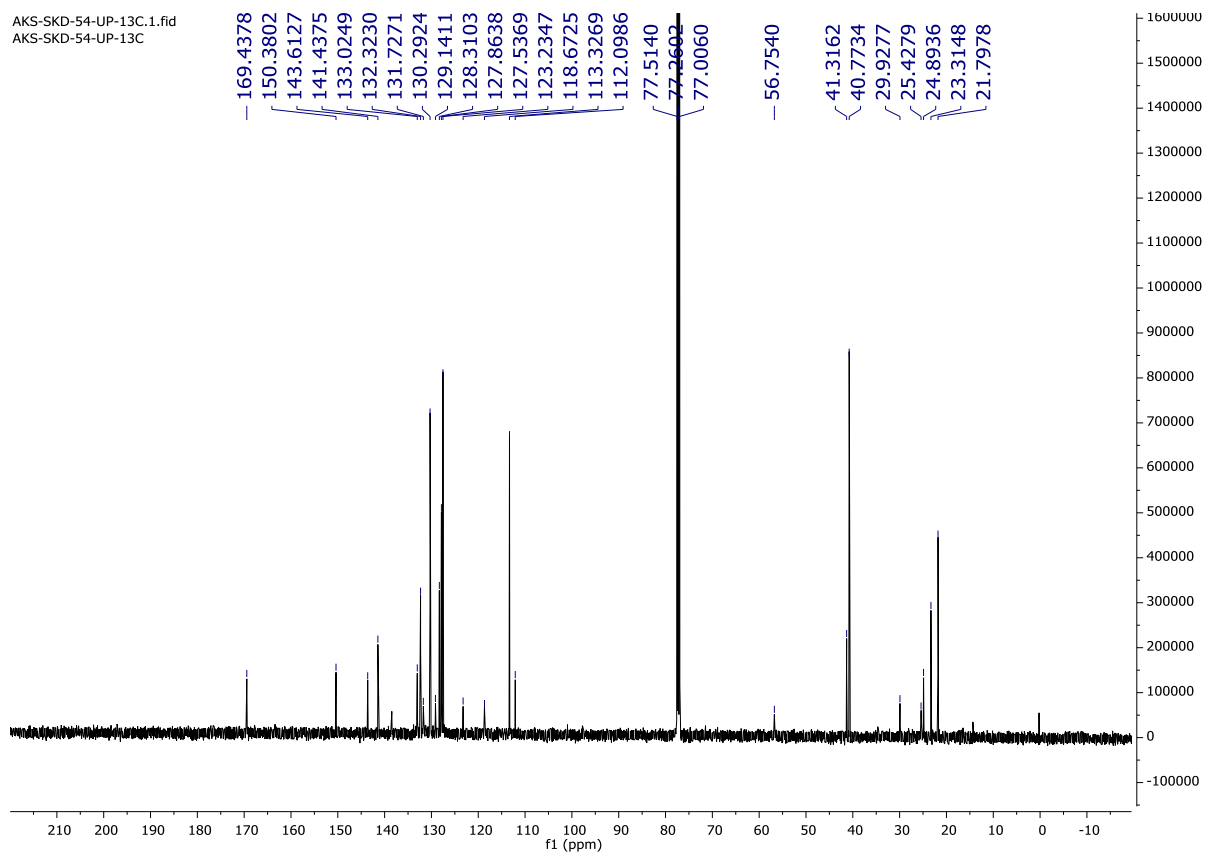

$^1\text{H}$  (400 MHz,  $\text{CDCl}_3$ ) and  $^{13}\text{C}\{^1\text{H}\}$  (125 MHz,  $\text{CDCl}_3$ ) NMR spectra of *E*-4en

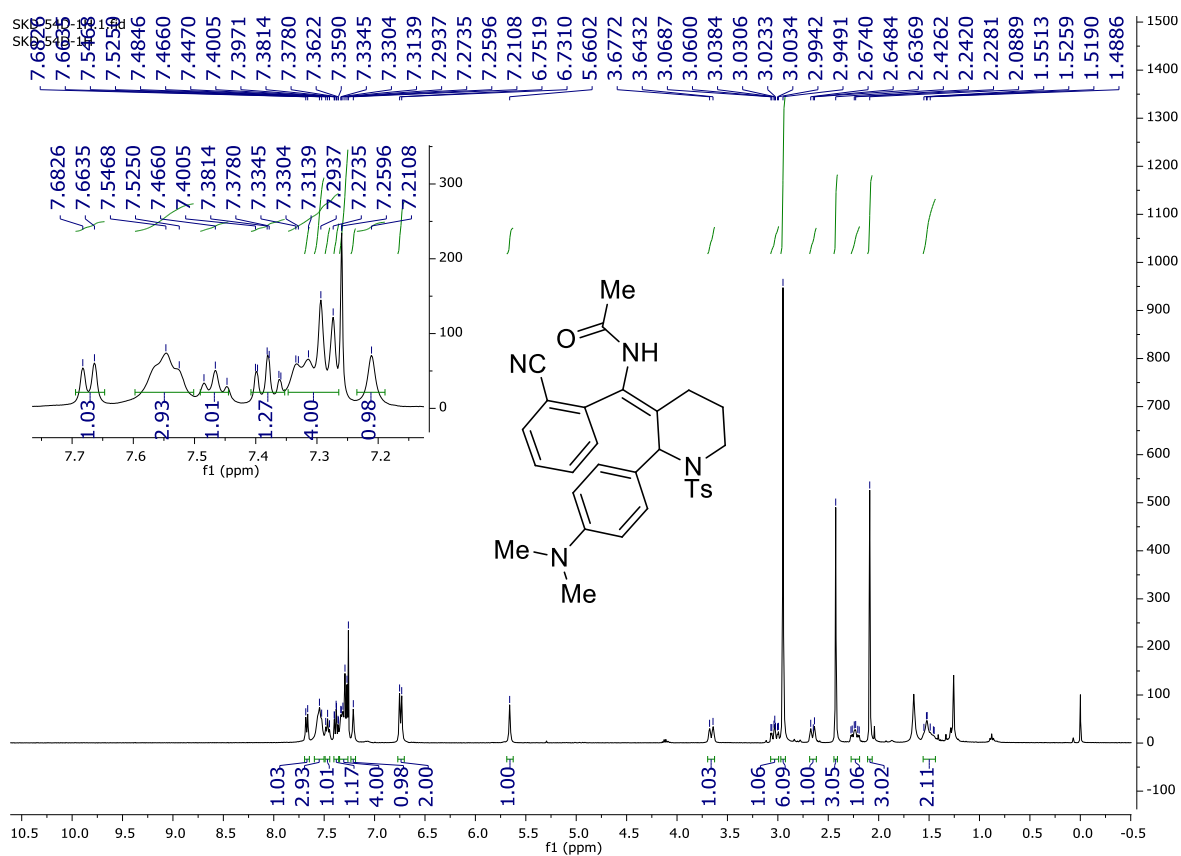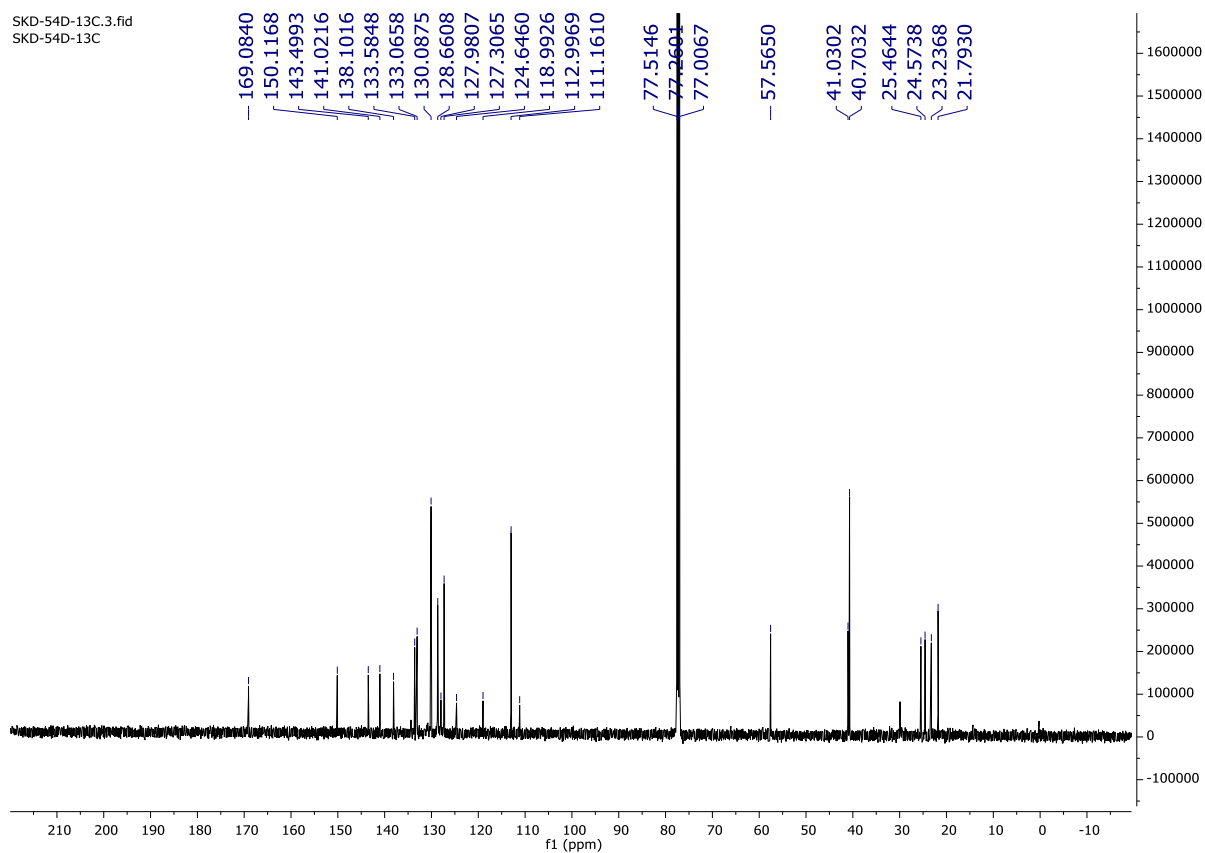

$^1\text{H}$  (400 MHz,  $\text{CDCl}_3$ ),  $^{13}\text{C}$  ( $^1\text{H}$ ) (150 MHz,  $\text{CDCl}_3$ ) NMR spectra of **Z-4eo**

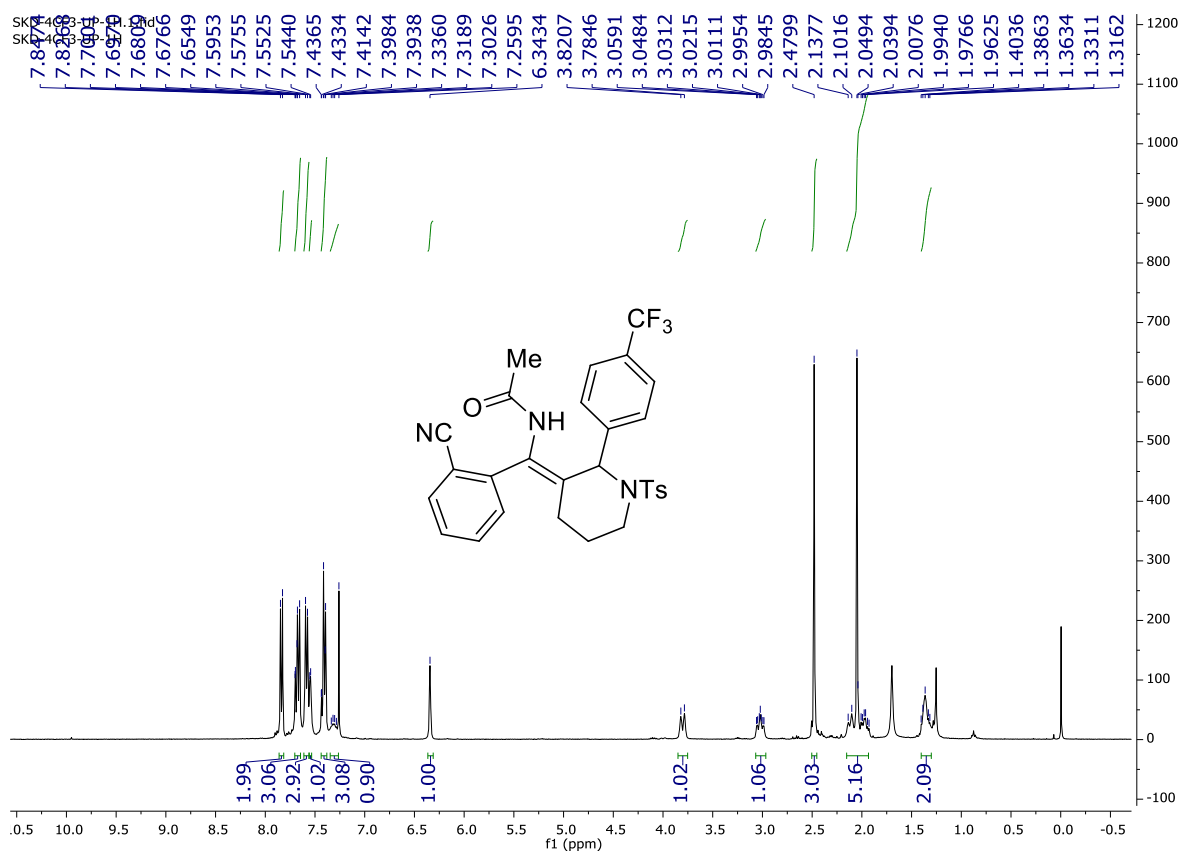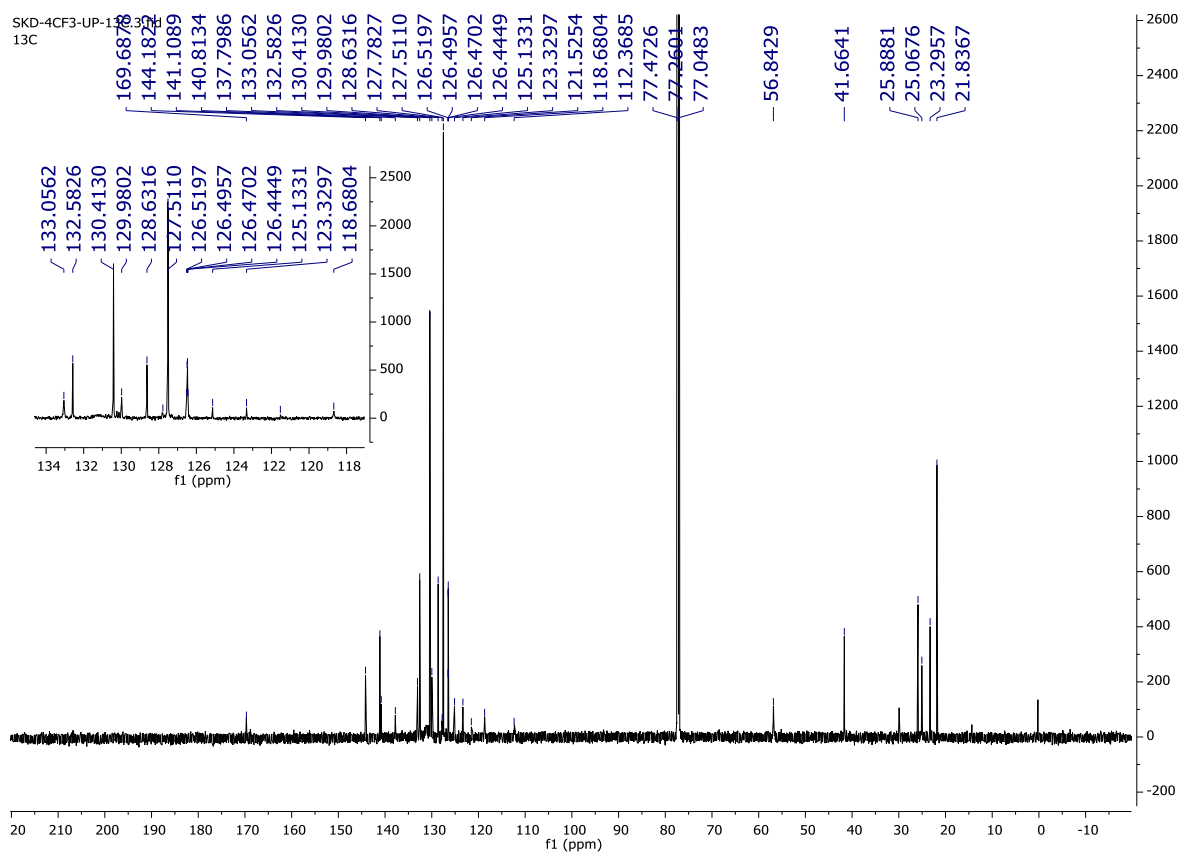

$^{19}\text{F}$  (565 MHz,  $\text{CDCl}_3$ ) NMR spectrum of **Z-4eo**

SKD-4CF3-UP-19F.1.fid  
19F

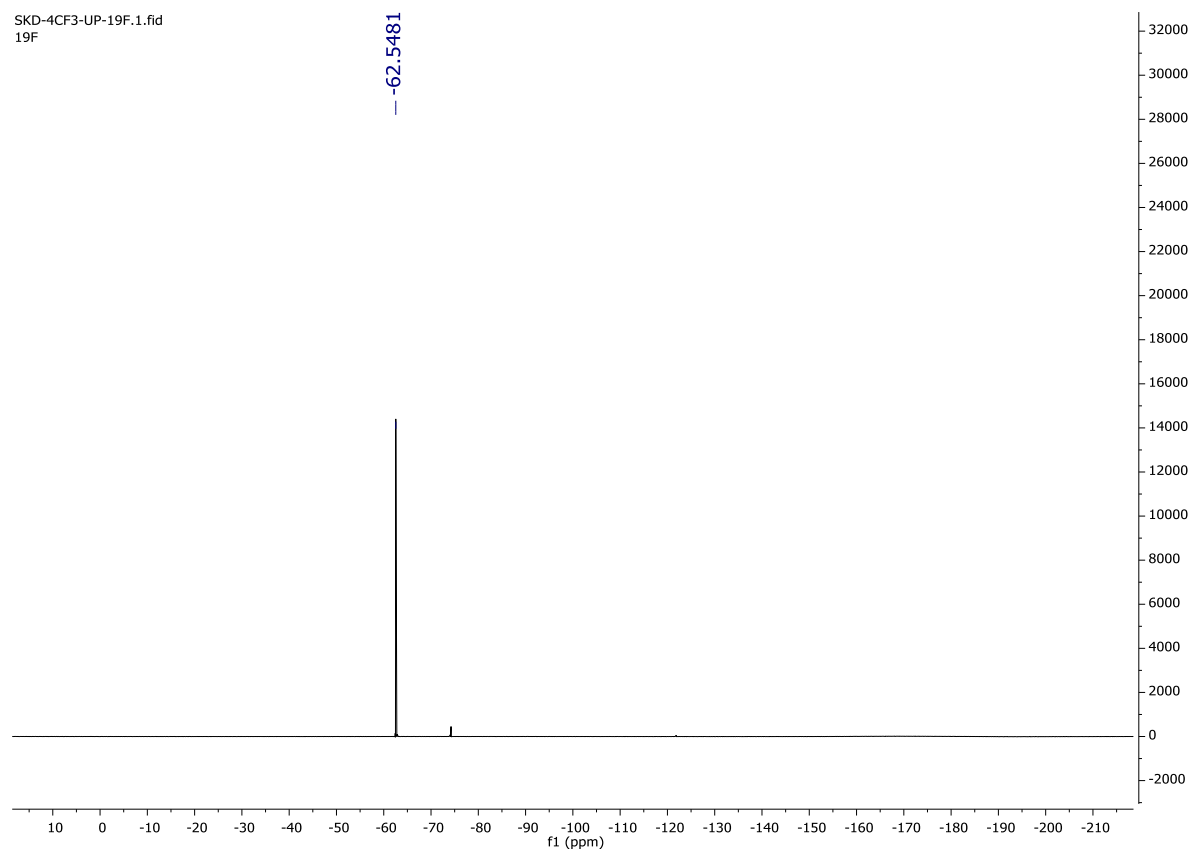

$^1\text{H}$  (400 MHz,  $\text{CDCl}_3$ ),  $^{13}\text{C}\{^1\text{H}\}$  (150 MHz,  $\text{CDCl}_3$ ) and  $^{19}\text{F}$  NMR spectra of *E-4eo*

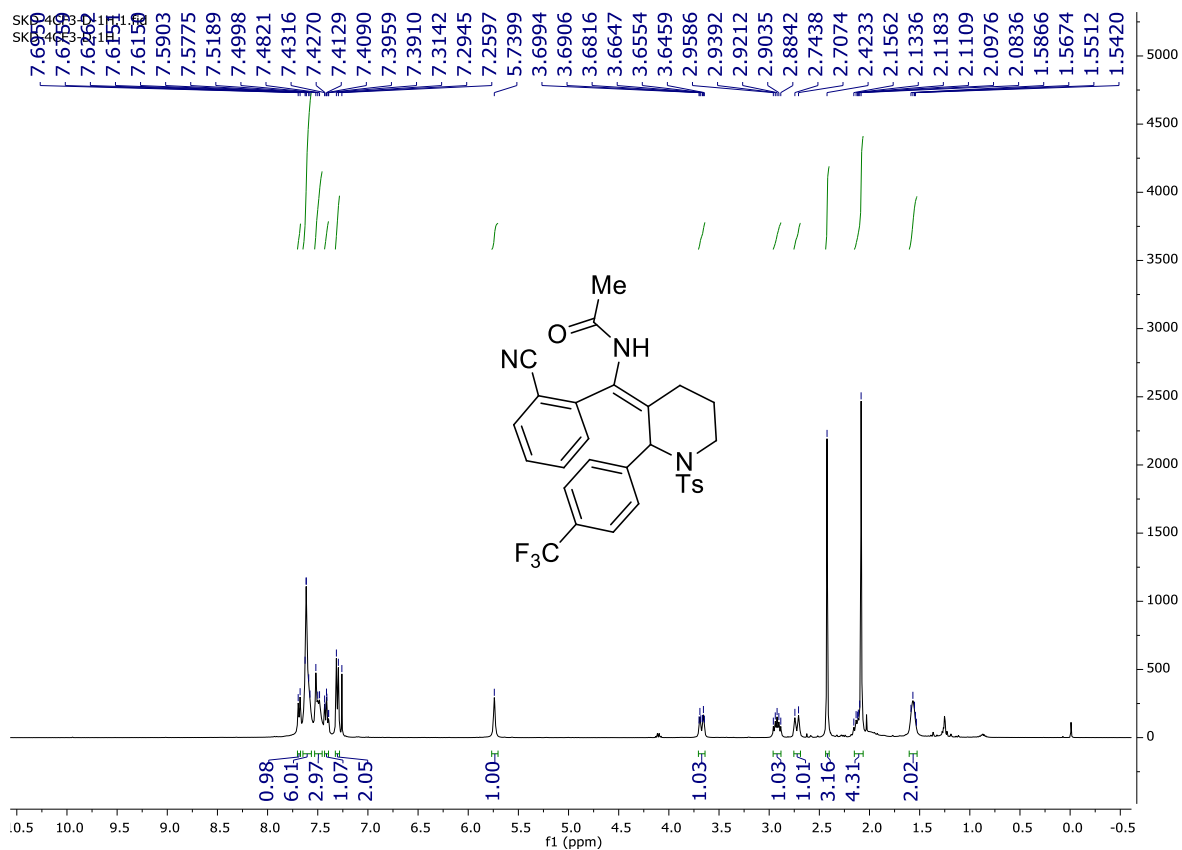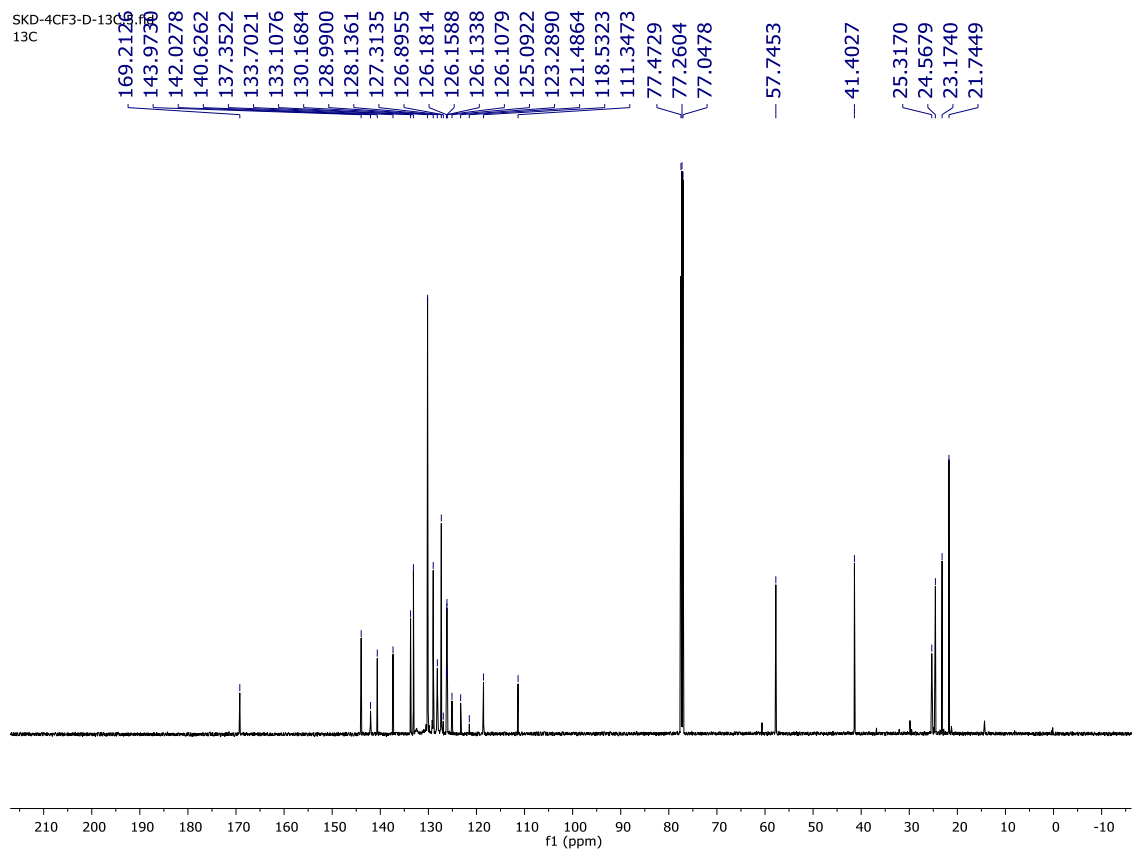



$^{19}\text{F}$  (565 MHz,  $\text{CDCl}_3$ ) NMR spectrum of *E*-4eo

SKD-4CF3-D-19F.4.fid  
19F

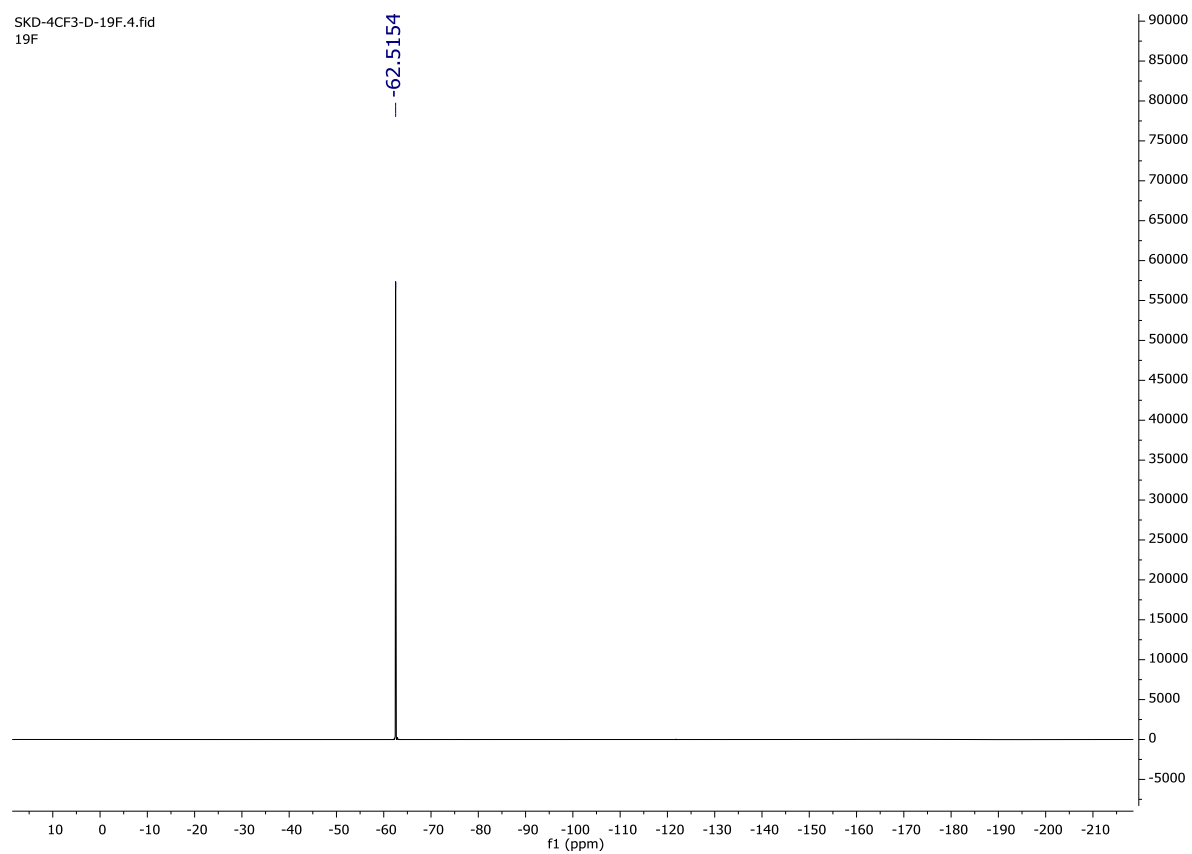

$^1\text{H}$  (400 MHz,  $\text{CDCl}_3$ ) and  $^{13}\text{C}\{^1\text{H}\}$  (125 MHz,  $\text{CDCl}_3$ ) NMR spectra of **Z-4eI**

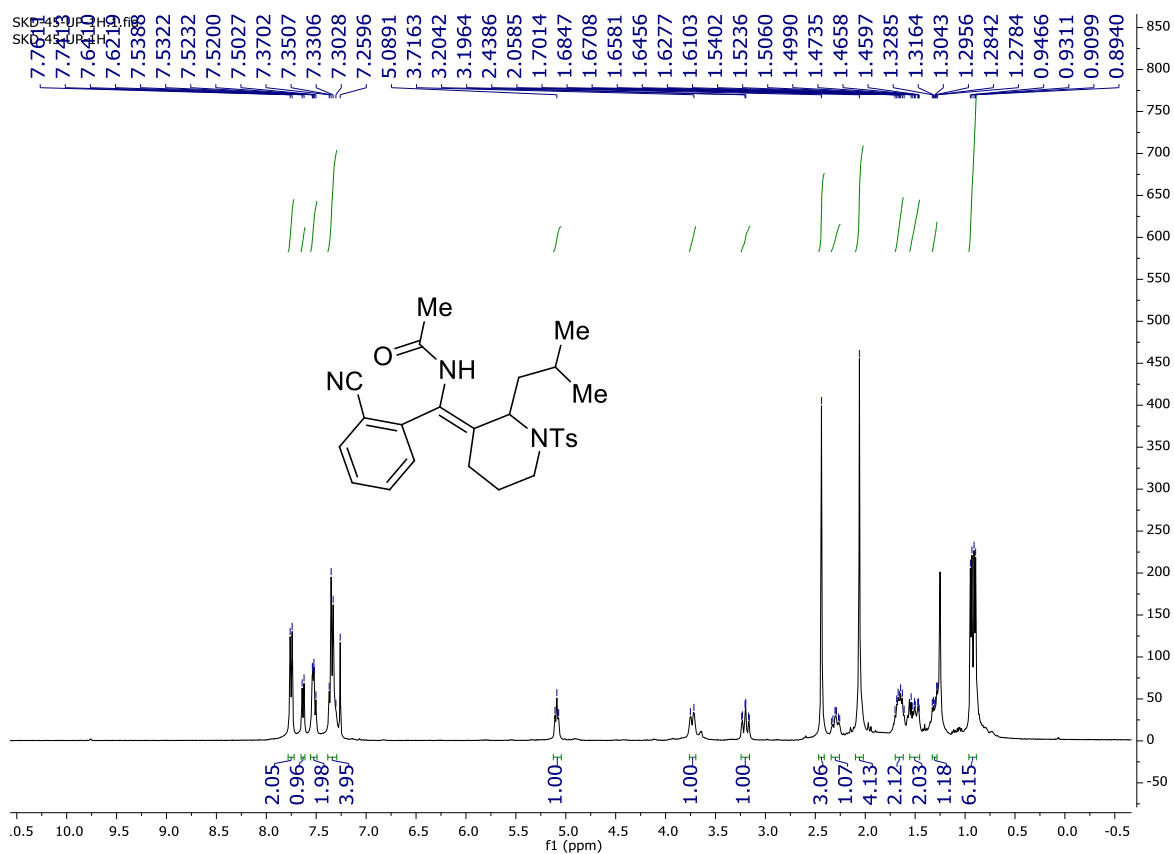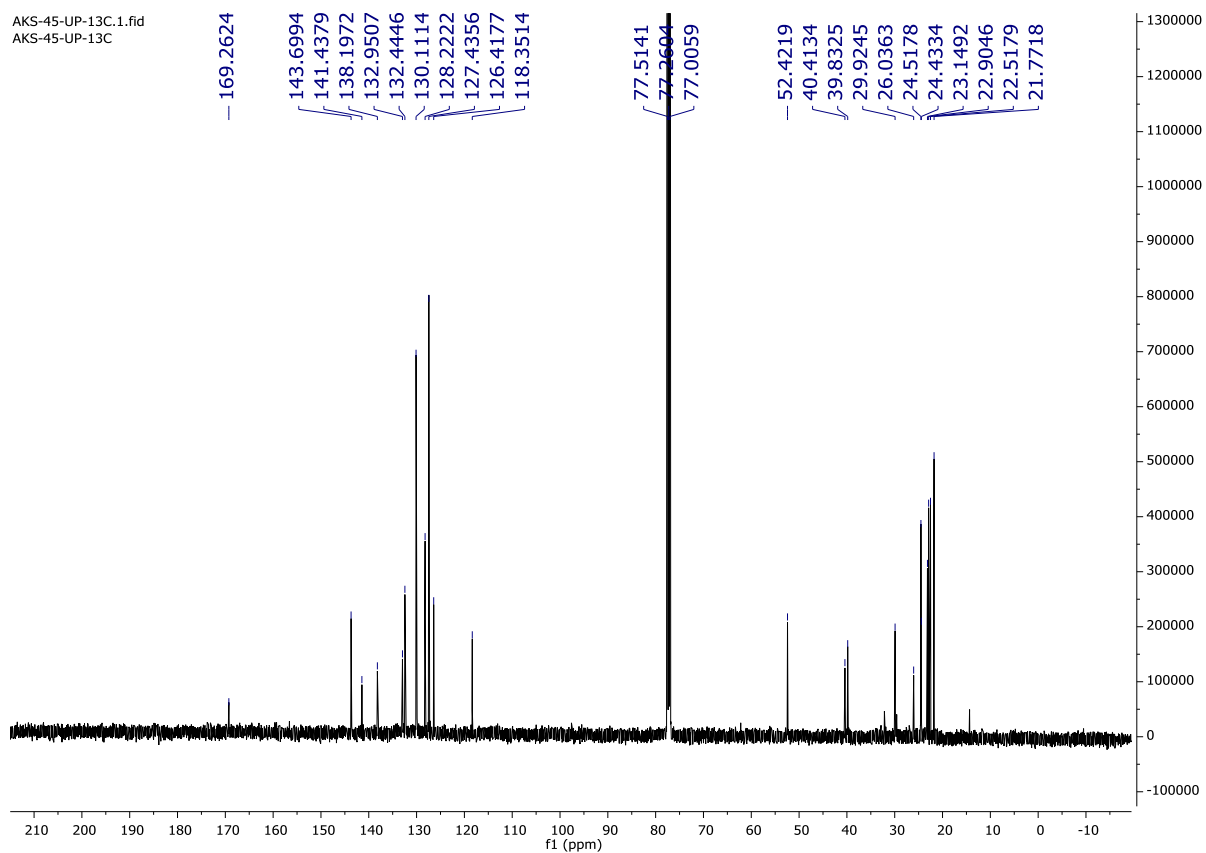

$^1\text{H}$  (400 MHz,  $\text{CDCl}_3$ ) and  $^{13}\text{C}\{^1\text{H}\}$  (125 MHz,  $\text{CDCl}_3$ ) NMR spectra of *E*-4el

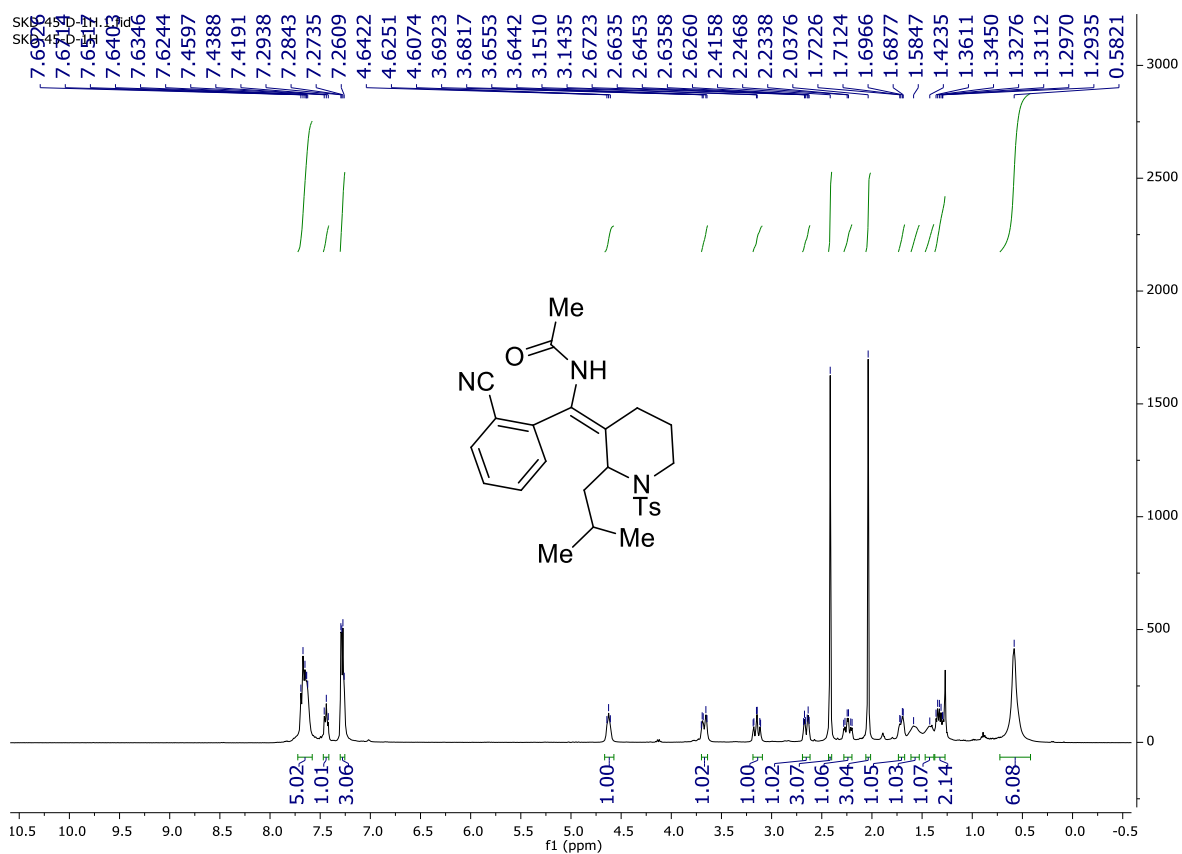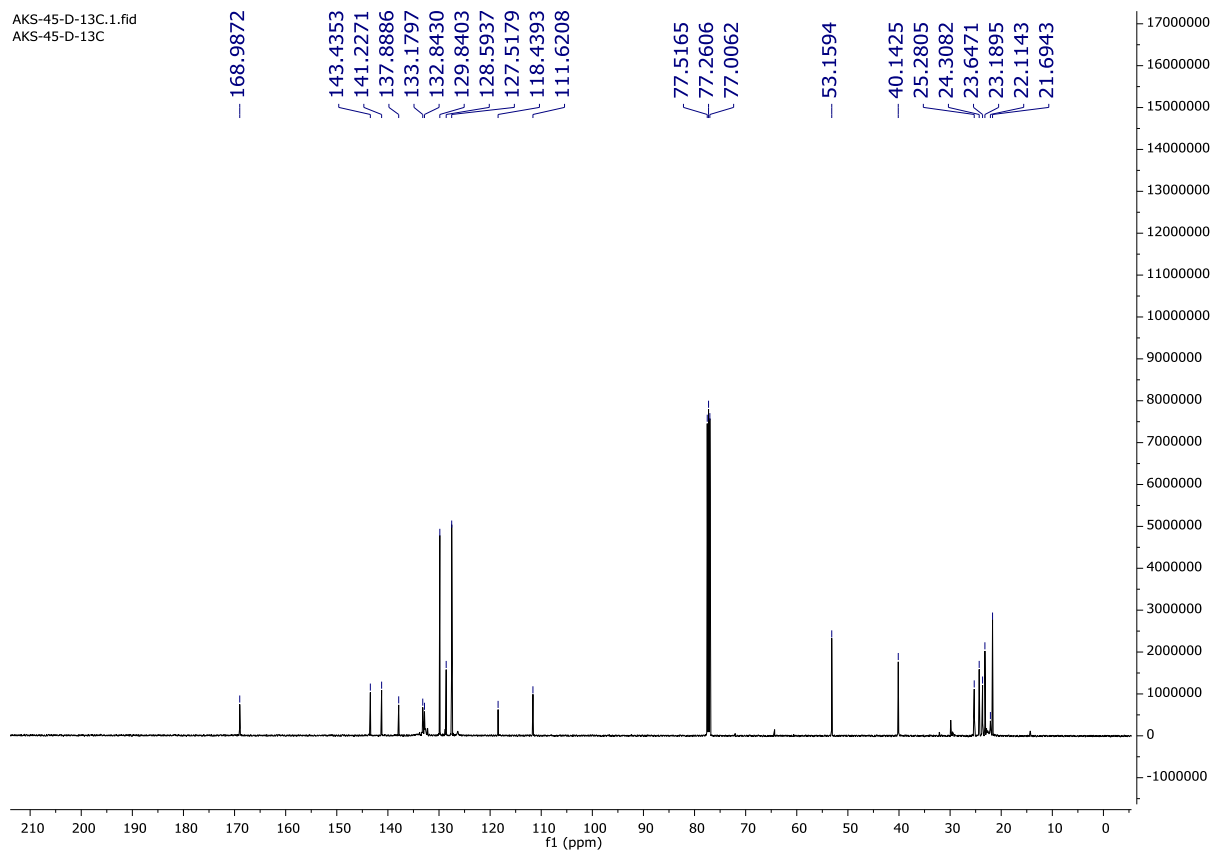

$^1\text{H}$  (400 MHz,  $\text{CDCl}_3$ ) and  $^{13}\text{C}$ { $^1\text{H}$ } (125 MHz,  $\text{CDCl}_3$ ) NMR spectra of **5fc**

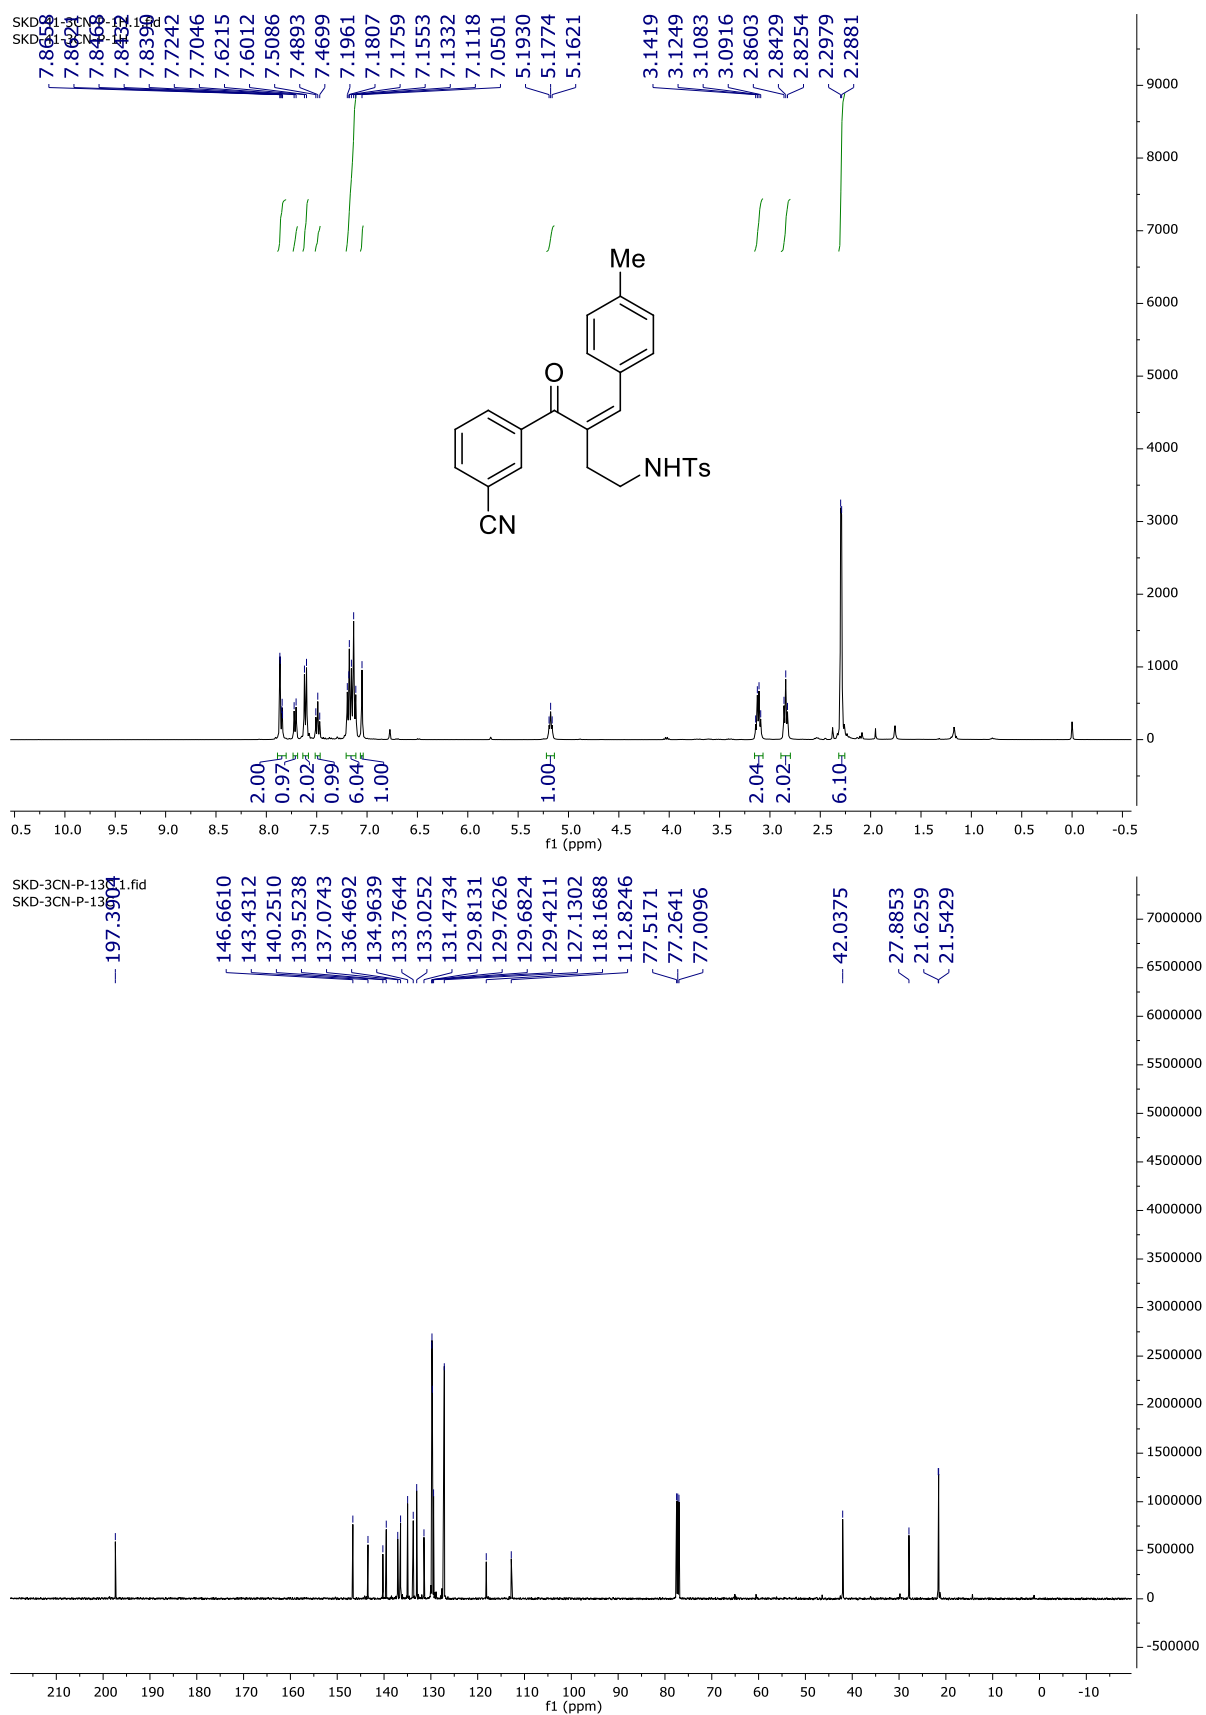

$^1\text{H}$  (600 MHz,  $\text{CDCl}_3$ ) and  $^{13}\text{C}\{^1\text{H}\}$  (150 MHz,  $\text{CDCl}_3$ ) NMR spectra of **5gc**

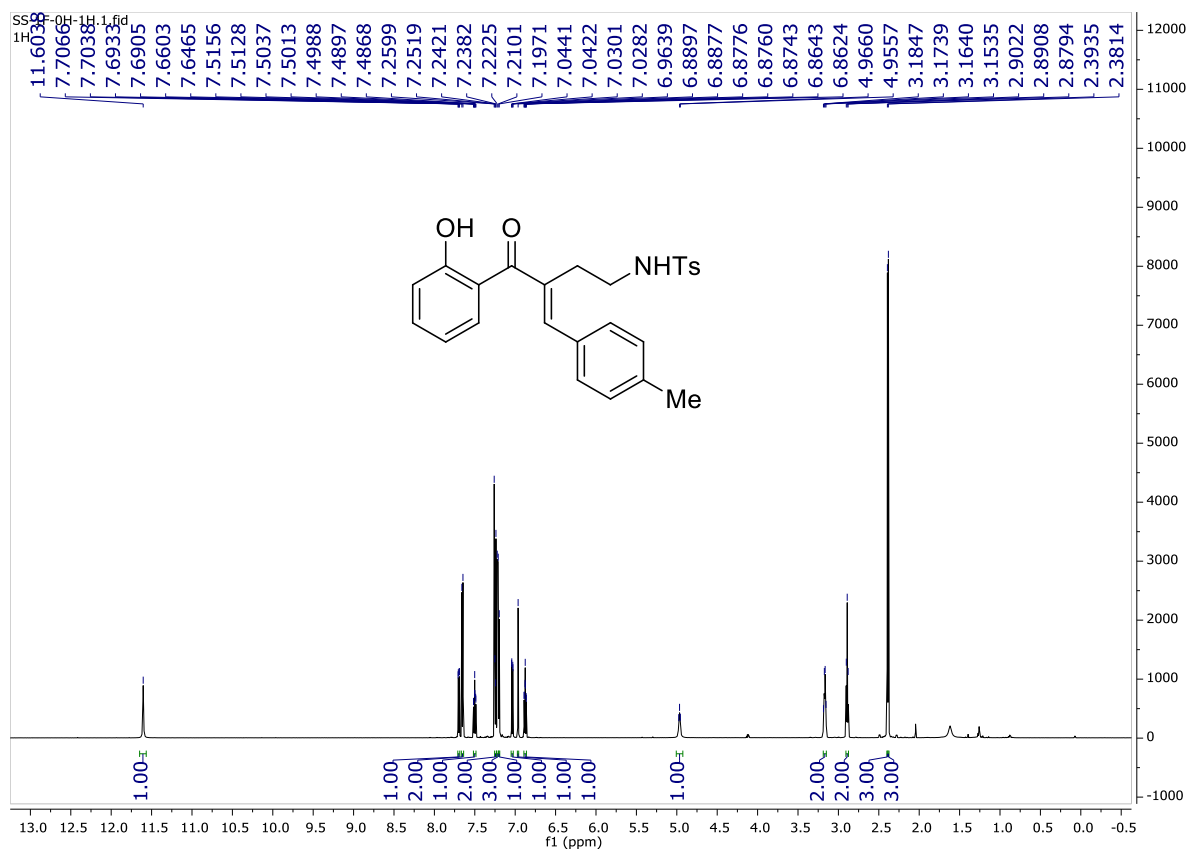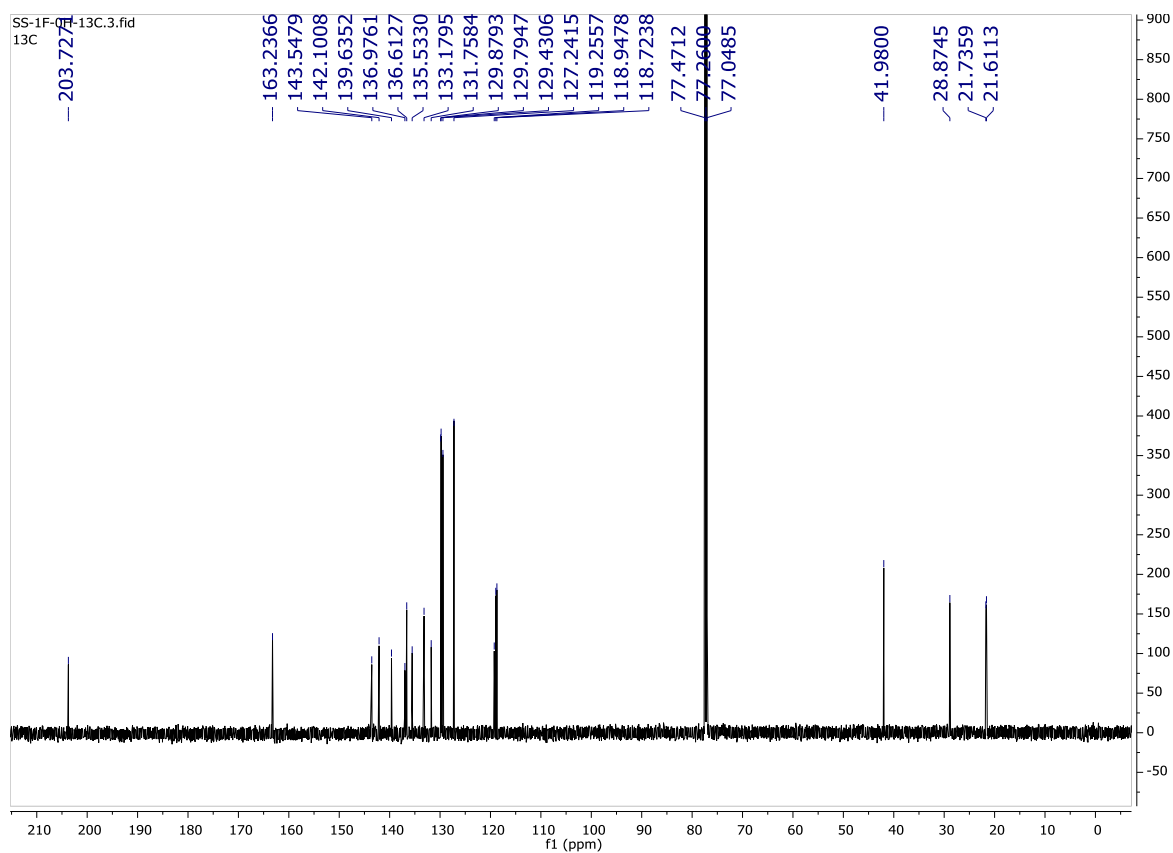

Crude <sup>1</sup>H (400 MHz, CDCl<sub>3</sub>) NMR spectrum of 3dm

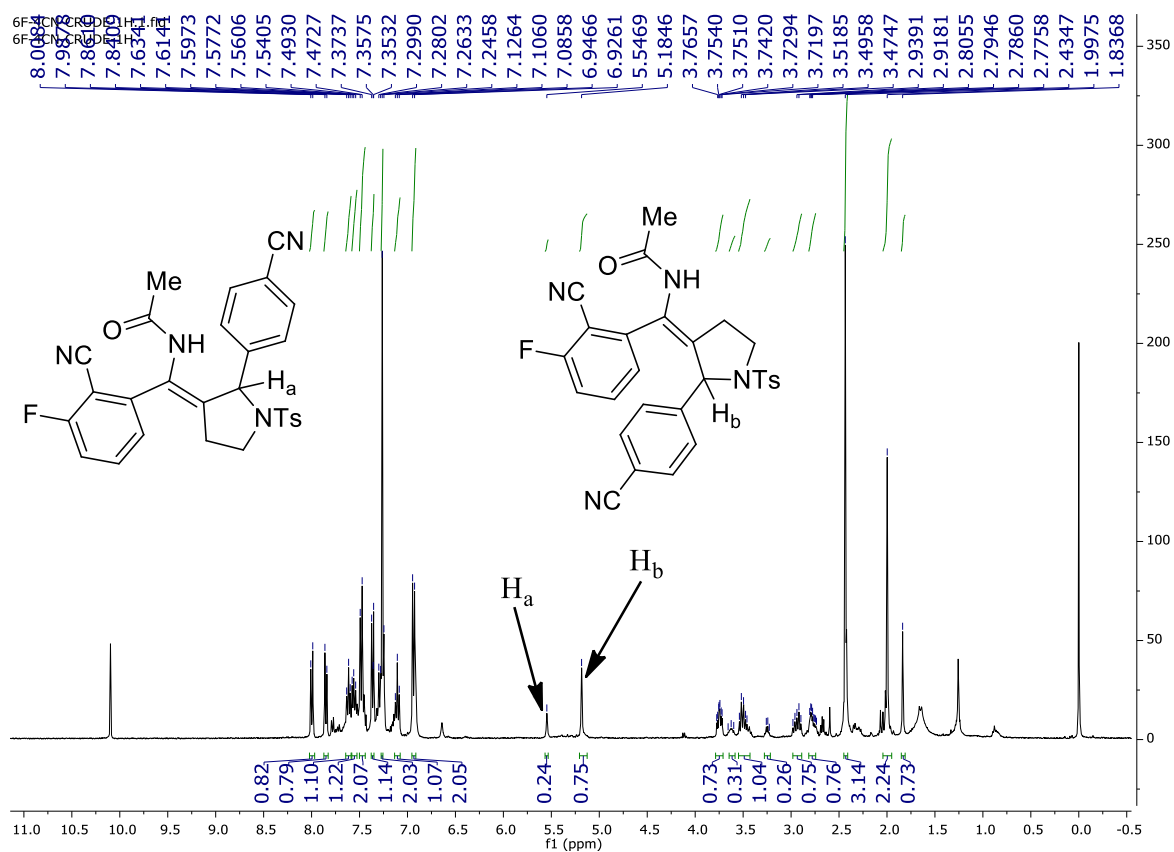

### Single crystal X-ray diffraction:

1. Single crystals of compound ***E-3ad***, was obtained by slow evaporation of hexane and ethyl acetate solution (9:1). The Bruker SMART APEX-II CCD diffractometer was used to collect the intensity data. The instrument is equipped with a fine focus 1.75 kW sealed tube Mo K $\alpha$  radiation ( $\lambda = 0.71073 \text{ \AA}$ ) at 293(3) K, with increasing  $\omega$  (width of  $0.3^\circ$  per frame) at a scan speed of 3 s/frame. The data acquisition was done with the SMART software. The SAINT and XPREP software were implemented for data integration and reduction.<sup>1</sup> Multiscan empirical absorption corrections were employed to the data using the program SADABS.<sup>2</sup> Structures were solved by direct methods using SHELXS- 2016 and refined with full-matrix least-squares on F2 using SHELXL- 2016/6.<sup>3</sup> Structural illustrations have been drawn with ORTEP-3 for Windows.<sup>4</sup> The detailed data collection and structure refinement are summarized in Table S1, CCDC 2287207 (for ***E-3ad***), contained supplementary crystallographic data for this paper.

### Reference:

- 1) SMART; SAINT; XPREP; Siemens Analytical X-ray Instruments Inc.: Madison, WI, 1995.
- 2) Sheldrick, G. M. SADABS: Software for Empirical Absorption Correction University of Gottingen, Institut fur Anorganische Chemieder Universitat: Gottingen, Germany, 1999.
- 3) Sheldrick, G. M. SHELXS-2014, Program for the crystal structure solution; University of Göttingen: Göttingen, Germany, 2014.
- 4) Farrugia, L. J. XRDIF: simulation of X-ray diffraction patterns, *J. Appl. Crystallogr.* **1997**, *30*, 565.

**Table S56: The crystal parameters of compound *E*-3ad**

|                                                     | CCDC 2287207                                                    |
|-----------------------------------------------------|-----------------------------------------------------------------|
| Formula                                             | C <sub>29</sub> H <sub>29</sub> N <sub>3</sub> O <sub>3</sub> S |
| Formula weight                                      | 499.61                                                          |
| <i>T</i> /K                                         | 297(2)                                                          |
| Crystal system                                      | monoclinic                                                      |
| Space group                                         | 'P 21/n'                                                        |
| <i>a</i> /Å                                         | 22.290(2)                                                       |
| <i>b</i> /Å                                         | 11.2327(11)                                                     |
| <i>c</i> /Å                                         | 22.560(2)                                                       |
| <i>α</i> /°                                         | 90                                                              |
| <i>β</i> /°                                         | 108.847(3)                                                      |
| <i>γ</i> /°                                         | 90                                                              |
| <i>V</i> /Å <sup>3</sup>                            | 5345.7(9)                                                       |
| <i>Z</i>                                            | 8                                                               |
| Abs. Coeff./mm <sup>-1</sup>                        | 0.156                                                           |
| Abs. Correction                                     | 'none'                                                          |
| GOF on <i>F</i> <sup>2</sup>                        | 0.981                                                           |
| Final <i>R</i> indices [ <i>I</i> > 2σ( <i>I</i> )] | <i>R</i> 1 = 0.0697<br><i>wR</i> 2 = 0.1717                     |
| <i>R</i> indices [all data]                         | <i>R</i> 1 = 0.1219<br><i>wR</i> 2 = 0.1972                     |



Figure S57: ORTEP diagram of compound *E*-3ad with 30% probability

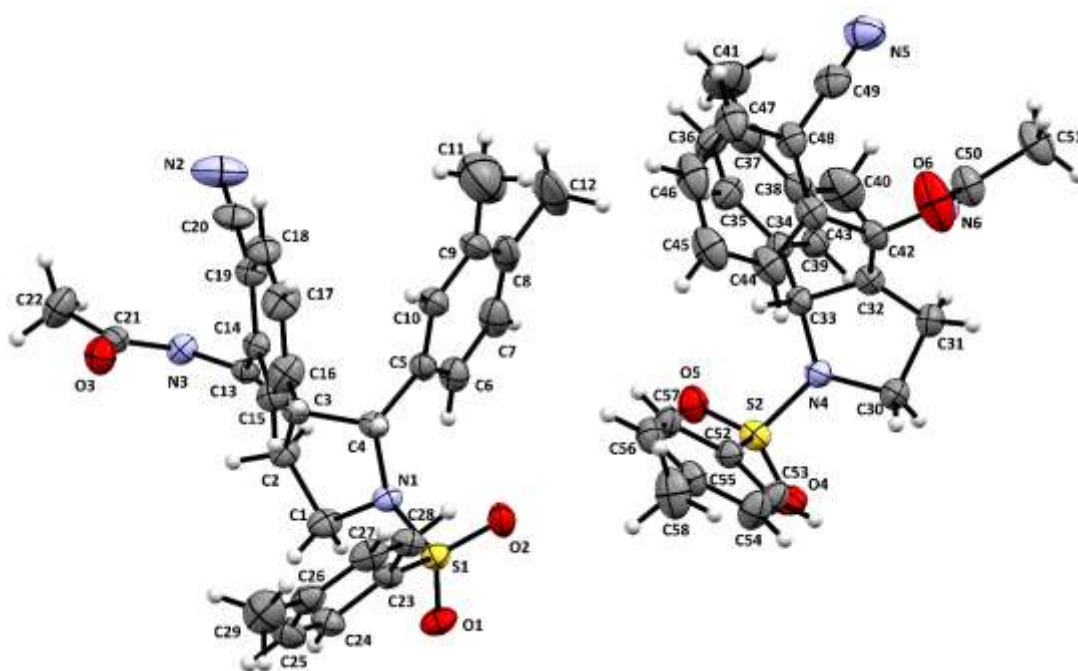

Supplement: d3ob01764h2.pdf [file d3ob01764h2.pdf]
